# Supplementary material
Source: PubMed Central journal article supplement (PMC10119774)
Supplement: jamaoncol-e230425-s001.pdf [file jamaoncol-e230425-s001.pdf]

---

## Supplementary Online Content

Mo S, Ye L, Wang D, et al. Early detection of molecular residual disease and risk stratification for stage I to III colorectal cancer via circulating tumor DNA methylation. *JAMA Oncol*. Published online April 20, 2023.  
doi:10.1001/jamaoncol.2023.0425

**eAppendix 1.** Postdefinitive Treatment Group Analysis

**eAppendix 2.** Surveillance Analysis

**eAppendix 3.** Circulating Tumor DNA Maintenance Analysis

**eAppendix 4.** ColonAiQ Assay

**eAppendix 5.** Statistical Analysis

**eAppendix 6.** Carcinoembryonic Antigen (CEA) Test and Integration of CEA With Circulating Tumor DNA

**eTable 1.** Clinicopathologic Patient Characteristics

**eTable 2.** Characteristics of Enrolled Patients

**eTable 3.** Circulating Tumor DNA Results for All 1228 Plasma Samples

**eTable 4.** Preoperative and Postoperative (POM1) Carcinoembryonic Antigen (CEA) Results

**eTable 5.** Number of Recurrent Patients According to Circulating Tumor DNA Status at Postoperative Month 1 (POM1)

**eTable 6.** Multivariable Cox Analysis of Recurrence-Free Survival by Circulating Tumor DNA and Carcinoembryonic Antigen (CEA) Status at Postoperative Month 1

**eTable 7.** Performance of 6 Methylated DNA Markers of ColonAiQ in Detecting Colorectal Cancer Recurrence

**eTable 8.** Performance Estimates of Circulating Tumor DNA and Carcinoembryonic Antigen (CEA) Status at Postoperative Month 1 for Detecting Recurrence in Single and Combined Diagnoses

---

**eTable 9.** Number of Recurring Patients According to Circulating Tumor DNA Status at Postoperative Month 1 (POM1) in Stage II and III ACT-Treated Patients in the Subgroup Analysis

**eTable 10.** Univariate Cox Analysis of Recurrence-Free Survival by Postoperative Circulating Tumor DNA Status at Postoperative Month 1 in Patients With Stage III Cancer With Different Clinical Risk Stratification and Adjuvant Chemotherapy (ACT) Treatment Durations

**eTable 11.** Compliance Rates at the Key Times

**eFigure 1.** Preoperative Detection of Circulating Tumor DNA and Carcinoembryonic Antigen (CEA) in Patients With Stage I to III Colorectal Cancer

**eFigure 2.** Patients With Recurrence in Preoperative Circulating Tumor DNA (Carcinoembryonic Antigen [CEA])–positive and Circulating Tumor DNA (CEA)–Negative Patients

**eFigure 3.** Prognostic Value by Stages

**eFigure 4.** Kaplan-Meier Estimates of Recurrence-Free Survival (RFS) Stratified by Carcinoembryonic Antigen (CEA) Status at Postoperative Month 1 for Patients Whose Preoperative CEA Levels Were Positive or Negative

**eFigure 5.** Subgroup Analysis of Circulating Tumor DNA Status in Patients With Preoperative and Postoperative Carcinoembryonic Antigen (CEA) Test

**eFigure 6.** Circulating Tumor DNA Status Postoperatively as a Prognostic Factor for Recurrence-Free Survival (RFS) in Patients With Stage III Cancer With Different Clinical Risk Stratifications and Adjuvant Chemotherapy (ACT) Treatment Durations

**eFigure 7.** Circulating Tumor DNA Status Postoperatively as a Prognostic Factor for Recurrence-Free Survival (RFS) in Patients With Stage II Cancer With Different Clinical Risk Stratifications and Adjuvant Chemotherapy (ACT) Treatment Durations

**eFigure 8.** Kaplan-Meier Estimates of Recurrence-Free Survival (RFS) Stratified by Circulating Tumor DNA Status at Postoperative Month 1 in Low-Risk Patients Without Adjuvant Chemotherapy (ACT)

---

**eFigure 9.** Postadjuvant Chemotherapy (ACT) Analysis for Detecting Colorectal Cancer Recurrence

**eFigure 10.** Risk Stratification by Circulating Tumor DNA in Patients Whose Plasma Was Collected at Both Postadjuvant Chemotherapy (ACT) and Postoperative Month 1 (POM1)

**eFigure 11.** Longitudinal Plot of Circulating Tumor DNA Status During Treatment in 299 Patients

This supplementary material has been provided by the authors to give readers additional information about their work.

---

1 **eAppendix 1. Postdefinitive Treatment Group Analysis**

2 The post-definitive treatment time point was defined as the first time point after  
3 completion of definitive therapy. For patients who underwent surgery alone, the time  
4 point was approximately 30 days after the surgery. For adjuvant chemotherapy (ACT)  
5 patients, the timepoint range of 0-5.4 months after ACT.

6  
7 **eAppendix 2. Surveillance Analysis**

8 Patients enrolled in the surveillance analysis consisted of all patients who removed  
9 time points immediately after treatment (surgery and adjuvant chemotherapy [ACT])  
10 except no-ACT-treated cases with only postoperative month 1 plasma available; also  
11 removing samples less than 6m follow-up time after the first positive timepoint after  
12 treatment.

13  
14 **eAppendix 3. Circulating Tumor DNA Maintenance Analysis**

15 Patients with at least two blood samples drawn postoperatively and consistent  
16 ColonAiQ results were enrolled in this analysis. Patients were defined as positive if  
17 the ColonAiQ tests remained unchanged and positive for all time points or as negative  
18 if the ColonAiQ tests were negative for all time points.

19  
20 **eAppendix 4. ColonAiQ Assay**

21 One tube of 8-10 mL of whole blood was collected from each patient and roughly 3-4  
22 mL of plasma was separated by a double-spin procedure. Plasma DNA extraction was  
23 performed using the QIAamp Circulating Nucleic Acid Kit (Qiagen, Hilden,  
24 Germany). DNA concentration was measured using a Qubit 3.0 fluorometer (Thermo  
25 Fisher Scientific). For bisulfite conversion, 10-20 ng of extracted DNA was converted  
26 using the EZ DNA Methylation-Lightning Kit (ZYMO RESEARCH) according to the  
27 manufacturer's instructions. The converted DNA was processed using the ColonAiQ  
28 kit (Cat. # QP010048R, Singlera Genomics (Shanghai) Ltd., Shanghai, China)

---

29 according to the manufacturer's protocol. Specifically, DNA was amplified with a pre-  
30 amplification primer pool, followed by quantitative PCR using the standard procedure  
31 in an ABI 7500 Real-Time PCR thermal cycler. The reference gene ACTB was used  
32 as an experimental quality control. The cut-off Ct for Septin9 locus 1, BCAT1,  
33 IKZF1, Septin9 locus 2, VAV3, and BCAN were 31.5, 35, 35, 35, 35, and 30,  
34 respectively. A marker was considered positive if its Ct in the test was lower than its  
35 cut-off Ct ( $Ct_{\text{test}} < Ct_{\text{cutoff}}$ ). A sample was considered positive if any of the six markers  
36 were positive.

37

### 38 **eAppendix 5. Statistical Analysis**

39 Sensitivity was defined as the number of patients with positive test results divided by  
40 the total number of patients with clinical relapse. Specificity was defined as the  
41 number of patients with negative test results divided by the total number of relapse-  
42 free patients. Statistical analyses were performed using R software v4.1.3. P values  
43 were based on 2-sided testing, and differences were considered significant at  $P < 0.05$ .

44

### 45 **eAppendix 6. Carcinoembryonic Antigen (CEA) Test and Integration of CEA With** 46 **Circulating Tumor DNA**

47 The concentration of CEA was determined by an electrochemiluminescence  
48 immunoassay using a Roche Cobas 8000 immunoassay analyzer (Roche Diagnostics,  
49 Mannheim, Germany). A sample with CEA levels of 5.2 ng/mL or above was  
50 considered positive. The integration of CEA and ctDNA was considered to be positive  
51 if a patient with a positive result in any of the two tests.

**eTable 1. Clinicopathologic Patient Characteristics**

| Patient ID | Gender | Age | TNM      | Stage | Primary tumor site | Histological type | Tumors differentiation | Vascular invasion | Perineural invasion | MMR Status | ACT | Relapse after OP month |
|------------|--------|-----|----------|-------|--------------------|-------------------|------------------------|-------------------|---------------------|------------|-----|------------------------|
| P1         | Male   | 50  | T3N2bM0  | III   | Left               | Adenoca.          | Moderated              | Yes               | Yes                 | pMMR       | Yes | NA                     |
| P2         | Female | 58  | T3N1aM0  | III   | Right              | Mucinous Adenoca. | Poor                   | No                | Yes                 | pMMR       | Yes | 5                      |
| P3         | Male   | 63  | T3N2aM0  | III   | Left               | Adenoca.          | Poor                   | Yes               | No                  | pMMR       | Yes | NA                     |
| P4         | Male   | 71  | T4aN1bM0 | III   | Left               | Adenoca.          | Moderated              | Yes               | Yes                 | pMMR       | Yes | 4                      |
| P5         | Female | 80  | T4aN2aM0 | III   | Right              | Adenoca.          | Poor                   | Yes               | Yes                 | pMMR       | Yes | 8                      |
| P6         | Female | 48  | T3N1cM0  | III   | Left               | Adenoca.          | Moderated              | Yes               | Yes                 | pMMR       | Yes | 23                     |
| P7         | Female | 67  | T3N0M0   | II    | Left               | Adenoca.          | Poor                   | No                | Yes                 | pMMR       | Yes | NA                     |
| P8         | Female | 48  | T4aN2aM0 | III   | Right              | Adenoca.          | Poor                   | Yes               | No                  | dMMR       | Yes | NA                     |
| P9         | Male   | 52  | T3N2bM0  | III   | Left               | Adenoca.          | Well                   | Yes               | No                  | pMMR       | Yes | NA                     |
| P10        | Male   | 66  | T4aN0M0  | II    | Left               | Adenoca.          | Moderated              | No                | No                  | pMMR       | Yes | NA                     |
| P11        | Male   | 65  | T3N0M0   | II    | Left               | Adenoca.          | Poor                   | No                | No                  | pMMR       | Yes | NA                     |
| P12        | Female | 69  | T3N1cM0  | III   | Left               | Adenoca.          | Poor                   | No                | No                  | pMMR       | Yes | 24                     |
| P13        | Female | 60  | T3N1cM0  | III   | Left               | Adenoca.          | Poor                   | Yes               | Yes                 | pMMR       | Yes | NA                     |
| P14        | Male   | 47  | T3N2bM0  | III   | Left               | SRCC              | Poor                   | Yes               | Yes                 | pMMR       | Yes | 15                     |
| P15        | Male   | 73  | T3N1bM0  | III   | Right              | Adenoca.          | Moderated              | Yes               | No                  | pMMR       | Yes | NA                     |
| P16        | Male   | 69  | T4bN2bM0 | III   | Right              | Mucinous Adenoca. | Moderated              | Yes               | No                  | pMMR       | Yes | 4                      |
| P17        | Male   | 77  | T3N2aM0  | III   | Right              | Adenoca.          | Well                   | No                | No                  | pMMR       | No  | NA                     |
| P18        | Female | 64  | T3N0M0   | II    | Right              | Adenoca.          | Moderated              | No                | Yes                 | pMMR       | Yes | NA                     |
| P19        | Male   | 67  | T3N2bM0  | III   | Left               | Adenoca.          | Moderated              | Yes               | No                  | pMMR       | Yes | 17                     |
| P20        | Male   | 72  | T2N0M0   | I     | Left               | Adenoca.          | Well                   | No                | No                  | pMMR       | No  | NA                     |
| P21        | Female | 77  | T1N0M0   | I     | Left               | Adenoca.          | Well                   | No                | No                  | pMMR       | No  | NA                     |
| P22        | Female | 57  | T4aN0M0  | II    | Left               | Adenoca.          | Moderated              | No                | Yes                 | pMMR       | Yes | 13                     |
| P23        | Male   | 37  | T3N0M0   | II    | Right              | Mucinous Adenoca. | Well                   | No                | No                  | pMMR       | Yes | 14                     |
| P24        | Female | 79  | T3N1aM0  | III   | Left               | Adenoca.          | Poor                   | Yes               | Yes                 | pMMR       | Yes | NA                     |
| P25        | Male   | 64  | T3N0M0   | II    | Right              | Adenoca.          | Moderated              | No                | No                  | pMMR       | Yes | 13                     |

**eTable 1. Clinicopathologic Patient Characteristics**

| Patient ID | Gender | Age | TNM      | Stage | Primary tumor site | Histological type | Tumors differentiation | Vascular invasion | Perineural invasion | MMR Status | ACT | Relapse after OP month |
|------------|--------|-----|----------|-------|--------------------|-------------------|------------------------|-------------------|---------------------|------------|-----|------------------------|
| P26        | Male   | 57  | T3N0M0   | II    | Left               | Adenoca.          | Moderated              | No                | Yes                 | pMMR       | Yes | NA                     |
| P27        | Female | 53  | T1N0M0   | I     | Left               | Adenoca.          | Well                   | No                | No                  | pMMR       | No  | 22                     |
| P28        | Male   | 59  | T3N0M0   | II    | Left               | Adenoca.          | Moderated              | No                | Yes                 | pMMR       | Yes | NA                     |
| P29        | Female | 60  | T3N0M0   | II    | Left               | Adenoca.          | Well                   | No                | No                  | pMMR       | Yes | NA                     |
| P30        | Male   | 55  | T2N0M0   | I     | Left               | Adenoca.          | Moderated              | No                | No                  | pMMR       | No  | NA                     |
| P31        | Female | 57  | T3N2bM0  | III   | Left               | Adenoca.          | Poor                   | No                | No                  | pMMR       | Yes | NA                     |
| P32        | Male   | 41  | T3N2bM0  | III   | Left               | Adenoca.          | Moderated              | Yes               | Yes                 | pMMR       | Yes | 8                      |
| P33        | Male   | 69  | T4aN2aM0 | III   | Right              | Mucinous Adenoca. | Poor                   | Yes               | Yes                 | pMMR       | Yes | 5                      |
| P34        | Male   | 73  | T4bN2bM0 | III   | Left               | Adenoca.          | Poor                   | No                | No                  | pMMR       | Yes | 15                     |
| P35        | Male   | 58  | T3N0M0   | II    | Left               | Adenoca.          | Poor                   | Yes               | No                  | pMMR       | Yes | 16                     |
| P36        | Female | 54  | T2N0M0   | I     | Right              | Adenoca.          | Poor                   | Yes               | Yes                 | pMMR       | No  | NA                     |
| P37        | Male   | 65  | T3N1bM0  | III   | Left               | Adenoca.          | Moderated              | Yes               | Yes                 | pMMR       | Yes | NA                     |
| P38        | Female | 57  | T1N2bM0  | III   | Left               | Adenoca.          | Moderated              | No                | No                  | pMMR       | Yes | NA                     |
| P39        | Male   | 68  | T1N0M0   | I     | Right              | Adenoca.          | Well                   | No                | No                  | pMMR       | No  | NA                     |
| P40        | Male   | 64  | T4aN1aM0 | III   | Left               | Adenoca.          | Moderated              | Yes               | Yes                 | pMMR       | Yes | NA                     |
| P41        | Male   | 60  | T3N0M0   | II    | Right              | Adenoca.          | Well                   | No                | No                  | dMMR       | No  | NA                     |
| P42        | Female | 58  | T3N0M0   | II    | Left               | Adenoca.          | Moderated              | Yes               | No                  | pMMR       | Yes | NA                     |
| P43        | Female | 71  | T3N0M0   | II    | Left               | Adenoca.          | Moderated              | Yes               | No                  | pMMR       | Yes | NA                     |
| P44        | Female | 66  | T3N0M0   | II    | Left               | Adenoca.          | Moderated              | Yes               | No                  | pMMR       | Yes | NA                     |
| P45        | Male   | 38  | T3N0M0   | II    | Right              | Mucinous Adenoca. | Moderated              | No                | No                  | pMMR       | Yes | NA                     |
| P46        | Male   | 57  | T3N0M0   | II    | Left               | Adenoca.          | Moderated              | No                | No                  | pMMR       | Yes | NA                     |
| P47        | Male   | 80  | T3N2aM0  | III   | Left               | Adenoca.          | Moderated              | Yes               | Yes                 | pMMR       | Yes | NA                     |
| P48        | Male   | 65  | T2N1bM0  | III   | Left               | Musinous          | Poor                   | Yes               | Yes                 | pMMR       | Yes | NA                     |
| P49        | Female | 44  | T3N1bM0  | III   | Left               | Adenoca.          | Poor                   | Yes               | Yes                 | pMMR       | Yes | 7                      |
| P50        | Male   | 56  | T3N2aM0  | III   | Left               | Mucinous Adenoca. | Poor                   | Yes               | No                  | pMMR       | Yes | NA                     |

**eTable 1. Clinicopathologic Patient Characteristics**

| Patient ID | Gender | Age | TNM      | Stage | Primary tumor site | Histological type | Tumors differentiation | Vascular invasion | Perineural invasion | MMR Status | ACT | Relapse after OP month |
|------------|--------|-----|----------|-------|--------------------|-------------------|------------------------|-------------------|---------------------|------------|-----|------------------------|
| P51        | Male   | 64  | T1N0M0   | I     | Left               | Adenoca.          | Moderated              | No                | No                  | pMMR       | No  | NA                     |
| P52        | Female | 57  | T4aN0M0  | II    | Right              | Adenoca.          | Poor                   | No                | Yes                 | pMMR       | Yes | NA                     |
| P53        | Female | 66  | T3N2bM0  | III   | Left               | Mucinous Adenoca. | Moderated              | No                | Yes                 | pMMR       | Yes | NA                     |
| P54        | Male   | 61  | T1N0M0   | I     | Left               | Adenoca.          | Well                   | No                | No                  | NA         | No  | NA                     |
| P55        | Male   | 40  | T3N0M0   | II    | Left               | Adenoca.          | Moderated              | Yes               | No                  | pMMR       | No  | NA                     |
| P56        | Female | 57  | T1N2aM0  | III   | Left               | Adenoca.          | Moderated              | Yes               | No                  | pMMR       | Yes | NA                     |
| P57        | Male   | 42  | T4aN2aM0 | III   | Left               | Musinous          | Poor                   | Yes               | No                  | dMMR       | Yes | NA                     |
| P58        | Male   | 60  | T3N0M0   | II    | Left               | Adenoca.          | Moderated              | No                | No                  | pMMR       | Yes | NA                     |
| P59        | Male   | 74  | T3N0M0   | II    | Left               | Adenoca.          | Moderated              | No                | No                  | pMMR       | Yes | NA                     |
| P60        | Male   | 70  | T3N0M0   | II    | Left               | Adenoca.          | Poor                   | Yes               | Yes                 | pMMR       | Yes | NA                     |
| P61        | Male   | 49  | T3N0M0   | II    | Left               | Adenoca.          | Moderated              | No                | No                  | pMMR       | No  | NA                     |
| P62        | Male   | 74  | T4bN1cM0 | III   | Left               | Adenoca.          | Poor                   | Yes               | Yes                 | dMMR       | Yes | 10                     |
| P63        | Male   | 79  | T3N0M0   | II    | Left               | Adenoca.          | Moderated              | No                | No                  | pMMR       | No  | NA                     |
| P64        | Female | 52  | T4aN1cM0 | III   | Left               | Adenoca.          | Poor                   | No                | Yes                 | pMMR       | Yes | NA                     |
| P65        | Female | 45  | T2N0M0   | I     | Left               | Adenoca.          | Moderated              | No                | No                  | dMMR       | No  | NA                     |
| P66        | Male   | 76  | T4aN0M0  | II    | Left               | Adenoca.          | Moderated              | No                | No                  | pMMR       | Yes | 4                      |
| P67        | Female | 59  | T2N0M0   | I     | Left               | Adenoca.          | Moderated              | No                | No                  | pMMR       | No  | NA                     |
| P68        | Male   | 67  | T2N0M0   | I     | Left               | Mucinous Adenoca. | Poor                   | No                | No                  | pMMR       | No  | NA                     |
| P69        | Female | 61  | T2N0M0   | I     | Left               | Adenoca.          | Well                   | No                | No                  | pMMR       | No  | 17                     |
| P70        | Male   | 55  | T3N1aM0  | III   | Left               | Mucinous Adenoca. | Moderated              | Yes               | No                  | pMMR       | Yes | NA                     |
| P71        | Male   | 71  | T2N0M0   | I     | Left               | Adenoca.          | Moderated              | No                | No                  | pMMR       | No  | NA                     |
| P72        | Male   | 66  | T3N1bM0  | III   | Left               | Adenoca.          | Well                   | Yes               | Yes                 | pMMR       | Yes | NA                     |
| P73        | Male   | 56  | T4aN0M0  | II    | Right              | Adenoca.          | Poor                   | Yes               | Yes                 | pMMR       | Yes | NA                     |
| P74        | Female | 76  | T3N1bM0  | III   | Right              | Adenoca.          | Poor                   | Yes               | No                  | pMMR       | Yes | NA                     |
| P75        | Male   | 56  | T3N0M0   | II    | Left               | Adenoca.          | Moderated              | No                | No                  | pMMR       | Yes | NA                     |



**eTable 1. Clinicopathologic Patient Characteristics**

| Patient ID | Gender | Age | TNM      | Stage | Primary tumor site | Histological type | Tumors differentiation | Vascular invasion | Perineural invasion | MMR Status | ACT | Relapse after OP month |
|------------|--------|-----|----------|-------|--------------------|-------------------|------------------------|-------------------|---------------------|------------|-----|------------------------|
| P76        | Male   | 38  | T3N1bM0  | III   | Left               | Adenoca.          | Moderated              | Yes               | Yes                 | pMMR       | Yes | NA                     |
| P77        | Female | 51  | T3N1bM0  | III   | Left               | Adenoca.          | Well                   | No                | No                  | pMMR       | Yes | NA                     |
| P78        | Female | 53  | T2N0M0   | I     | Left               | Adenoca.          | Moderated              | Yes               | No                  | pMMR       | No  | NA                     |
| P79        | Male   | 54  | T2N0M0   | I     | Left               | Adenoca.          | Well                   | No                | No                  | pMMR       | No  | 5                      |
| P80        | Male   | 50  | T3N0M0   | II    | Left               | Adenoca.          | Moderated              | No                | No                  | pMMR       | No  | NA                     |
| P81        | Female | 60  | T3N0M0   | II    | Left               | Adenoca.          | Moderated              | No                | No                  | pMMR       | Yes | NA                     |
| P82        | Male   | 65  | T4aN1bM0 | III   | Left               | Adenoca.          | Moderated              | Yes               | No                  | pMMR       | Yes | 4                      |
| P83        | Male   | 71  | T4aN2aM0 | III   | Right              | Mucinous Adenoca. | Poor                   | Yes               | Yes                 | pMMR       | Yes | NA                     |
| P84        | Female | 45  | T3N0M0   | II    | Left               | Adenoca.          | Moderated              | No                | No                  | pMMR       | Yes | NA                     |
| P85        | Male   | 68  | T3N0M0   | II    | Left               | Adenoca.          | Moderated              | Yes               | No                  | pMMR       | Yes | NA                     |
| P86        | Female | 47  | T1N0M0   | I     | Left               | Adenoca.          | Moderated              | Yes               | No                  | pMMR       | No  | NA                     |
| P87        | Male   | 59  | T2N0M0   | I     | Left               | Adenoca.          | Moderated              | No                | No                  | pMMR       | No  | NA                     |
| P88        | Female | 34  | T3N0M0   | II    | Left               | Mucinous Adenoca. | Moderated              | No                | No                  | dMMR       | No  | NA                     |
| P89        | Male   | 74  | T2N2aM0  | III   | Left               | Adenoca.          | Poor                   | Yes               | No                  | pMMR       | Yes | NA                     |
| P90        | Female | 74  | T3N0M0   | II    | Right              | Adenoca.          | Poor                   | No                | Yes                 | dMMR       | Yes | 6                      |
| P91        | Male   | 68  | T3N1cM0  | III   | Left               | Adenoca.          | Moderated              | No                | No                  | pMMR       | Yes | NA                     |
| P92        | Male   | 70  | T3N0M0   | II    | Left               | Adenoca.          | Moderated              | No                | No                  | pMMR       | Yes | NA                     |
| P93        | Female | 72  | T2N0M0   | I     | Left               | Adenoca.          | Well                   | No                | No                  | pMMR       | No  | NA                     |
| P94        | Male   | 67  | T1N0M0   | I     | Left               | Adenoca.          | Moderated              | No                | No                  | pMMR       | No  | NA                     |
| P95        | Male   | 44  | T3N0M0   | II    | Left               | Adenoca.          | Well                   | No                | No                  | pMMR       | No  | NA                     |
| P96        | Male   | 56  | T3N0M0   | II    | Right              | Adenoca.          | Moderated              | No                | No                  | pMMR       | Yes | NA                     |
| P97        | Female | 76  | T4aN2bM0 | III   | Right              | Adenoca.          | Moderated              | Yes               | Yes                 | pMMR       | Yes | 8                      |
| P98        | Male   | 65  | T3N0M0   | II    | Left               | Adenoca.          | Moderated              | No                | No                  | pMMR       | Yes | NA                     |
| P99        | Male   | 57  | T3N1bM0  | III   | Right              | Adenoca.          | Moderated              | Yes               | No                  | NA         | Yes | NA                     |
| P100       | Female | 55  | T2N0M0   | I     | Left               | Adenoca.          | Moderated              | No                | No                  | pMMR       | No  | NA                     |

**eTable 1. Clinicopathologic Patient Characteristics**

| Patient ID | Gender | Age | TNM      | Stage | Primary tumor site | Histological type | Tumors differentiation | Vascular invasion | Perineural invasion | MMR Status | ACT | Relapse after OP month |
|------------|--------|-----|----------|-------|--------------------|-------------------|------------------------|-------------------|---------------------|------------|-----|------------------------|
| P101       | Male   | 63  | T3N0M0   | II    | Left               | Adenoca.          | Moderated              | No                | Yes                 | pMMR       | Yes | NA                     |
| P102       | Male   | 63  | T3N1cM0  | III   | Left               | Adenoca.          | Moderated              | Yes               | Yes                 | pMMR       | Yes | 10                     |
| P103       | Male   | 48  | T2N1aM0  | III   | Left               | Adenoca.          | Moderated              | Yes               | No                  | pMMR       | Yes | 11                     |
| P104       | Male   | 68  | T2N0M0   | I     | Left               | Adenoca.          | Moderated              | Yes               | No                  | pMMR       | No  | NA                     |
| P105       | Female | 56  | T2N0M0   | I     | Left               | Adenoca.          | Moderated              | No                | No                  | pMMR       | No  | NA                     |
| P106       | Female | 66  | T4aN0M0  | II    | Left               | Mucinous Adenoca. | Poor                   | No                | No                  | pMMR       | Yes | NA                     |
| P107       | Female | 44  | T2N0M0   | I     | Left               | Adenoca.          | Moderated              | No                | No                  | pMMR       | No  | NA                     |
| P108       | Male   | 60  | T2N1aM0  | III   | Right              | Adenoca.          | Poor                   | No                | No                  | pMMR       | Yes | NA                     |
| P109       | Female | 61  | T3N2bM0  | III   | Right              | Mucinous Adenoca. | Poor                   | Yes               | Yes                 | pMMR       | Yes | 15                     |
| P110       | Male   | 68  | T3N0M0   | II    | Left               | Adenoca.          | Moderated              | No                | No                  | pMMR       | Yes | NA                     |
| P111       | Male   | 56  | T3N1aM0  | III   | Right              | Adenoca.          | Moderated              | No                | Yes                 | pMMR       | Yes | NA                     |
| P112       | Female | 60  | T3N0M0   | II    | Right              | Adenoca.          | Moderated              | No                | No                  | pMMR       | No  | NA                     |
| P113       | Female | 72  | T3N0M0   | II    | Left               | Adenoca.          | Moderated              | No                | No                  | pMMR       | No  | NA                     |
| P114       | Female | 57  | T3N0M0   | II    | Left               | Adenoca.          | Moderated              | No                | No                  | pMMR       | Yes | NA                     |
| P115       | Male   | 49  | T1N0M0   | I     | Left               | Adenoca.          | Moderated              | No                | No                  | pMMR       | No  | 17                     |
| P116       | Male   | 65  | T4aN1cM0 | III   | Left               | SRCC              | Poor                   | Yes               | No                  | pMMR       | Yes | 4                      |
| P117       | Female | 53  | T3N0M0   | II    | Right              | Adenoca.          | Poor                   | No                | No                  | pMMR       | Yes | NA                     |
| P118       | Female | 56  | T4bN2bM0 | III   | Right              | SRCC              | Poor                   | Yes               | Yes                 | pMMR       | Yes | 7                      |
| P119       | Female | 36  | T2N2aM0  | III   | Left               | Adenoca.          | Moderated              | Yes               | No                  | pMMR       | Yes | NA                     |
| P120       | Male   | 43  | T3N0M0   | II    | Left               | Adenoca.          | Moderated              | No                | Yes                 | dMMR       | Yes | NA                     |
| P121       | Female | 30  | T3N0M0   | II    | Left               | Adenoca.          | Moderated              | No                | Yes                 | pMMR       | Yes | NA                     |
| P122       | Male   | 52  | T4bN1bM0 | III   | Left               | Adenoca.          | Moderated              | No                | No                  | pMMR       | Yes | NA                     |
| P123       | Male   | 68  | T3N0M0   | II    | Left               | Adenoca.          | Moderated              | No                | No                  | pMMR       | Yes | NA                     |
| P124       | Male   | 69  | T3N0M0   | II    | Left               | Adenoca.          | Moderated              | No                | No                  | pMMR       | No  | 9                      |
| P125       | Male   | 77  | T3N1aM0  | III   | Left               | Adenoca.          | Poor                   | Yes               | No                  | pMMR       | No  | NA                     |

**eTable 1. Clinicopathologic Patient Characteristics**

| Patient ID | Gender | Age | TNM      | Stage | Primary tumor site | Histological type | Tumors differentiation | Vascular invasion | Perineural invasion | MMR Status | ACT | Relapse after OP month |
|------------|--------|-----|----------|-------|--------------------|-------------------|------------------------|-------------------|---------------------|------------|-----|------------------------|
| P126       | Male   | 63  | T2N0M0   | I     | Left               | Adenoca.          | Moderated              | No                | No                  | pMMR       | No  | 17                     |
| P127       | Female | 34  | T2N1aM0  | III   | Left               | Adenoca.          | Poor                   | No                | No                  | pMMR       | Yes | NA                     |
| P128       | Male   | 60  | T3N0M0   | II    | Left               | Adenoca.          | Moderated              | No                | No                  | pMMR       | Yes | NA                     |
| P129       | Male   | 79  | T3N0M0   | II    | Left               | Adenoca.          | Moderated              | No                | No                  | pMMR       | No  | NA                     |
| P130       | Male   | 40  | T3N0M0   | II    | Left               | Adenoca.          | Moderated              | No                | No                  | pMMR       | Yes | NA                     |
| P131       | Male   | 55  | T1N0M0   | I     | Left               | Adenoca.          | Moderated              | No                | No                  | pMMR       | No  | NA                     |
| P132       | Male   | 33  | T2N0M0   | I     | Left               | Adenoca.          | Moderated              | No                | No                  | pMMR       | No  | NA                     |
| P133       | Male   | 51  | T3N1bM0  | III   | Left               | Adenoca.          | Moderated              | No                | Yes                 | pMMR       | Yes | NA                     |
| P134       | Male   | 52  | T3N0M0   | II    | Right              | Adenoca.          | Moderated              | No                | No                  | pMMR       | No  | NA                     |
| P135       | Female | 58  | T3N1aM0  | III   | Right              | Adenoca.          | Moderated              | No                | No                  | pMMR       | Yes | NA                     |
| P136       | Male   | 60  | T4aN1bM0 | III   | Right              | Adenoca.          | Moderated              | No                | No                  | pMMR       | Yes | NA                     |
| P137       | Female | 40  | T3N0M0   | II    | Left               | Adenoca.          | Moderated              | No                | No                  | pMMR       | No  | NA                     |
| P138       | Female | 73  | T3N0M0   | II    | Right              | Adenoca.          | Moderated              | No                | No                  | NA         | No  | NA                     |
| P139       | Male   | 60  | T3N0M0   | II    | Left               | Adenoca.          | Moderated              | No                | Yes                 | NA         | Yes | NA                     |
| P140       | Male   | 67  | T4aN1bM0 | III   | Left               | Adenoca.          | Moderated              | No                | No                  | pMMR       | Yes | NA                     |
| P141       | Male   | 75  | T2N0M0   | I     | Left               | Adenoca.          | Moderated              | No                | No                  | pMMR       | No  | NA                     |
| P142       | Male   | 62  | T4bN2bM0 | III   | Left               | Adenoca.          | Poor                   | No                | No                  | pMMR       | Yes | NA                     |
| P143       | Male   | 73  | T3N0M0   | II    | Left               | Adenoca.          | Moderated              | No                | No                  | pMMR       | Yes | NA                     |
| P144       | Female | 62  | T2N1aM0  | III   | Right              | Adenoca.          | Moderated              | No                | No                  | pMMR       | Yes | NA                     |
| P145       | Male   | 76  | T1N0M0   | I     | Left               | Adenoca.          | Well                   | No                | No                  | NA         | No  | NA                     |
| P146       | Female | 76  | T3N1bM0  | III   | Left               | Adenoca.          | Poor                   | Yes               | No                  | pMMR       | Yes | NA                     |
| P147       | Female | 65  | T4aN2bM0 | III   | Left               | Adenoca.          | Moderated              | Yes               | Yes                 | pMMR       | Yes | NA                     |
| P148       | Female | 45  | T1N0M0   | I     | Left               | Adenoca.          | Well                   | No                | No                  | pMMR       | No  | NA                     |
| P149       | Male   | 66  | T4bN1cM0 | III   | Left               | Adenoca.          | Moderated              | No                | No                  | pMMR       | Yes | 14                     |
| P150       | Male   | 68  | T4aN2aM0 | III   | Left               | Adenoca.          | Moderated              | Yes               | Yes                 | pMMR       | Yes | NA                     |

**eTable 1. Clinicopathologic Patient Characteristics**

| Patient ID | Gender | Age | TNM      | Stage | Primary tumor site | Histological type | Tumors differentiation | Vascular invasion | Perineural invasion | MMR Status | ACT | Relapse after OP month |
|------------|--------|-----|----------|-------|--------------------|-------------------|------------------------|-------------------|---------------------|------------|-----|------------------------|
| P151       | Male   | 51  | T3N0M0   | II    | Right              | Mucinous Adenoca. | Poor                   | No                | No                  | dMMR       | Yes | NA                     |
| P152       | Male   | 56  | T3N0M0   | II    | Left               | Adenoca.          | Moderated              | Yes               | No                  | pMMR       | Yes | NA                     |
| P153       | Female | 50  | T3N1aM0  | III   | Right              | Adenoca.          | Moderated              | Yes               | Yes                 | pMMR       | Yes | NA                     |
| P154       | Male   | 58  | T3N1bM0  | III   | Left               | Adenoca.          | Moderated              | No                | Yes                 | pMMR       | Yes | NA                     |
| P155       | Male   | 56  | T3N1aM0  | III   | Left               | Adenoca.          | Poor                   | Yes               | Yes                 | pMMR       | Yes | 9                      |
| P156       | Female | 69  | T2N0M0   | I     | Left               | Adenoca.          | Moderated              | No                | No                  | pMMR       | No  | NA                     |
| P157       | Male   | 51  | T3N1bM0  | III   | Left               | Adenoca.          | Moderated              | Yes               | No                  | pMMR       | Yes | NA                     |
| P158       | Female | 53  | T3N1aM0  | III   | Left               | Adenoca.          | Moderated              | No                | No                  | pMMR       | Yes | NA                     |
| P159       | Male   | 71  | T1N0M0   | I     | Left               | Adenoca.          | Moderated              | No                | No                  | pMMR       | No  | NA                     |
| P160       | Male   | 68  | T3N1bM0  | III   | Left               | Adenoca.          | Moderated              | Yes               | No                  | pMMR       | Yes | NA                     |
| P161       | Male   | 59  | T2N0M0   | I     | Left               | Adenoca.          | Moderated              | No                | No                  | pMMR       | No  | NA                     |
| P162       | Female | 67  | T3N0M0   | II    | Left               | Mucinous Adenoca. | Poor                   | No                | No                  | pMMR       | Yes | 4                      |
| P163       | Female | 61  | T3N1cM0  | III   | Left               | Adenoca.          | Moderated              | No                | Yes                 | pMMR       | Yes | NA                     |
| P164       | Male   | 68  | T3N1aM0  | III   | Left               | Adenoca.          | Moderated              | Yes               | Yes                 | pMMR       | Yes | NA                     |
| P165       | Male   | 54  | T3N1cM0  | III   | Left               | Adenoca.          | Moderated              | Yes               | No                  | pMMR       | Yes | NA                     |
| P166       | Male   | 70  | T3N0M0   | II    | Right              | Adenoca.          | Poor                   | No                | No                  | pMMR       | Yes | NA                     |
| P167       | Female | 47  | T3N0M0   | II    | Left               | Adenoca.          | Moderated              | No                | No                  | pMMR       | Yes | NA                     |
| P168       | Male   | 57  | T3N2aM0  | III   | Left               | Adenoca.          | Moderated              | Yes               | No                  | pMMR       | Yes | NA                     |
| P169       | Male   | 53  | T4aN0M0  | II    | Left               | Adenoca.          | Moderated              | No                | No                  | pMMR       | Yes | NA                     |
| P170       | Female | 65  | T3N1cM0  | III   | Left               | Adenoca.          | Moderated              | Yes               | Yes                 | pMMR       | Yes | NA                     |
| P171       | Female | 65  | T4aN2aM0 | III   | Left               | Adenoca.          | Moderated              | Yes               | No                  | pMMR       | Yes | NA                     |
| P172       | Female | 71  | T3N0M0   | II    | Left               | Adenoca.          | Moderated              | No                | Yes                 | pMMR       | Yes | NA                     |
| P173       | Male   | 67  | T3N0M0   | II    | Left               | Adenoca.          | Moderated              | No                | Yes                 | pMMR       | Yes | NA                     |
| P174       | Male   | 64  | T3N1bM0  | III   | Right              | Mucinous Adenoca. | Moderated              | Yes               | Yes                 | pMMR       | Yes | NA                     |
| P175       | Female | 59  | T1N0M0   | I     | Left               | Adenoca.          | Moderated              | No                | No                  | pMMR       | No  | NA                     |

**eTable 1. Clinicopathologic Patient Characteristics**

| Patient ID | Gender | Age | TNM      | Stage | Primary tumor site | Histological type | Tumors differentiation | Vascular invasion | Perineural invasion | MMR Status | ACT | Relapse after OP month |
|------------|--------|-----|----------|-------|--------------------|-------------------|------------------------|-------------------|---------------------|------------|-----|------------------------|
| P176       | Male   | 56  | T4aN2aM0 | III   | Left               | Adenoca.          | Moderated              | Yes               | Yes                 | pMMR       | Yes | NA                     |
| P177       | Male   | 71  | T3N1aM0  | III   | Left               | Adenoca.          | Poor                   | Yes               | No                  | pMMR       | Yes | NA                     |
| P178       | Male   | 65  | T2N0M0   | I     | Left               | Adenoca.          | Moderated              | No                | No                  | pMMR       | No  | NA                     |
| P179       | Male   | 40  | T3N2bM0  | III   | Left               | Adenoca.          | Moderated              | Yes               | Yes                 | pMMR       | Yes | 4                      |
| P180       | Male   | 61  | T1N0M0   | I     | Right              | Adenoca.          | Well                   | No                | No                  | pMMR       | No  | NA                     |
| P181       | Male   | 50  | T3N2aM0  | III   | Left               | Adenoca.          | Moderated              | Yes               | Yes                 | pMMR       | Yes | NA                     |
| P182       | Male   | 49  | T3N1bM0  | III   | Left               | SRCC              | Poor                   | Yes               | Yes                 | pMMR       | Yes | NA                     |
| P183       | Male   | 59  | T1N0M0   | I     | Left               | Adenoca.          | Moderated              | No                | No                  | pMMR       | No  | NA                     |
| P184       | Male   | 55  | T3N0M0   | II    | Left               | Adenoca.          | Moderated              | No                | No                  | pMMR       | Yes | NA                     |
| P185       | Female | 50  | T3N2bM0  | III   | Right              | Adenoca.          | Moderated              | Yes               | Yes                 | pMMR       | Yes | 10                     |
| P186       | Male   | 55  | T3N0M0   | II    | Left               | Adenoca.          | Moderated              | No                | No                  | pMMR       | Yes | NA                     |
| P187       | Male   | 63  | T3N2bM0  | III   | Left               | Adenoca.          | Poor                   | Yes               | No                  | pMMR       | Yes | NA                     |
| P188       | Female | 64  | T3N1bM0  | III   | Left               | Adenoca.          | Moderated              | No                | Yes                 | pMMR       | Yes | 4                      |
| P189       | Male   | 61  | T2N0M0   | I     | Left               | Adenoca.          | Moderated              | No                | No                  | pMMR       | No  | NA                     |
| P190       | Female | 71  | T2N0M0   | I     | Left               | Adenoca.          | Moderated              | No                | No                  | pMMR       | No  | NA                     |
| P191       | Male   | 69  | T3N1bM0  | III   | Right              | Adenoca.          | Moderated              | Yes               | No                  | pMMR       | Yes | NA                     |
| P192       | Male   | 50  | T3N1cM0  | III   | Left               | Mucinous Adenoca. | Poor                   | Yes               | Yes                 | pMMR       | Yes | 14                     |
| P193       | Male   | 51  | T4aN2bM0 | III   | Left               | Mucinous Adenoca. | Poor                   | Yes               | Yes                 | pMMR       | Yes | NA                     |
| P194       | Male   | 66  | T1N0M0   | I     | Left               | Adenoca.          | Moderated              | No                | No                  | pMMR       | No  | NA                     |
| P195       | Male   | 40  | T3N0M0   | II    | Left               | Mucinous Adenoca. | Poor                   | Yes               | No                  | pMMR       | Yes | NA                     |
| P196       | Male   | 49  | T3N1bM0  | III   | Left               | Adenoca.          | Moderated              | Yes               | No                  | pMMR       | Yes | NA                     |
| P197       | Male   | 52  | T3N0M0   | II    | Right              | Mucinous Adenoca. | Poor                   | No                | No                  | pMMR       | Yes | NA                     |
| P198       | Female | 52  | T3N2bM0  | III   | Right              | Adenoca.          | Poor                   | Yes               | No                  | pMMR       | Yes | NA                     |
| P199       | Male   | 61  | T1N0M0   | I     | Left               | Adenoca.          | Well                   | No                | No                  | NA         | No  | NA                     |
| P200       | Male   | 57  | T2N0M0   | I     | Left               | Adenoca.          | Moderated              | No                | No                  | pMMR       | No  | 13                     |

**eTable 1. Clinicopathologic Patient Characteristics**

| Patient ID | Gender | Age | TNM      | Stage | Primary tumor site | Histological type | Tumors differentiation | Vascular invasion | Perineural invasion | MMR Status | ACT | Relapse after OP month |
|------------|--------|-----|----------|-------|--------------------|-------------------|------------------------|-------------------|---------------------|------------|-----|------------------------|
| P201       | Male   | 66  | T2N0M0   | I     | Left               | Adenoca.          | Well                   | No                | No                  | pMMR       | No  | NA                     |
| P202       | Male   | 53  | T2N0M0   | I     | Left               | Mucinous Adenoca. | Poor                   | No                | No                  | pMMR       | No  | NA                     |
| P203       | Male   | 70  | T3N1bM0  | III   | Left               | Adenoca.          | Moderated              | Yes               | No                  | pMMR       | Yes | NA                     |
| P204       | Female | 66  | T3N2aM0  | III   | Left               | Mucinous Adenoca. | Poor                   | Yes               | Yes                 | pMMR       | Yes | NA                     |
| P205       | Male   | 75  | T3N0M0   | II    | Left               | Adenoca.          | Moderated              | Yes               | No                  | pMMR       | Yes | NA                     |
| P206       | Male   | 69  | T4aN1bM0 | III   | Left               | Adenoca.          | Moderated              | Yes               | No                  | pMMR       | Yes | 14                     |
| P207       | Female | 65  | T4aN0M0  | II    | Right              | Adenoca.          | Moderated              | No                | No                  | pMMR       | Yes | NA                     |
| P208       | Male   | 67  | T3N0M0   | II    | Left               | Adenoca.          | Moderated              | Yes               | No                  | pMMR       | Yes | NA                     |
| P209       | Male   | 73  | T1N0M0   | I     | Left               | Adenoca.          | Well                   | No                | No                  | pMMR       | No  | NA                     |
| P210       | Female | 66  | T3N1aM0  | III   | Left               | Adenoca.          | Poor                   | Yes               | No                  | pMMR       | Yes | NA                     |
| P211       | Male   | 67  | T2N0M0   | I     | Left               | Adenoca.          | Well                   | No                | No                  | pMMR       | No  | NA                     |
| P212       | Female | 40  | T4aN1bM0 | III   | Right              | Adenoca.          | Moderated              | Yes               | Yes                 | pMMR       | Yes | NA                     |
| P213       | Female | 60  | T2N1bM0  | III   | Left               | Adenoca.          | Poor                   | Yes               | Yes                 | pMMR       | Yes | NA                     |
| P214       | Female | 52  | T3N2aM0  | III   | Left               | Adenoca.          | Moderated              | Yes               | Yes                 | pMMR       | Yes | NA                     |
| P215       | Male   | 78  | T4bN0M0  | II    | Right              | Adenoca.          | Poor                   | No                | Yes                 | pMMR       | Yes | NA                     |
| P216       | Male   | 60  | T1N0M0   | I     | Left               | Adenoca.          | Well                   | No                | No                  | pMMR       | No  | NA                     |
| P217       | Male   | 71  | T2N0M0   | I     | Right              | Adenoca.          | Poor                   | No                | No                  | pMMR       | No  | NA                     |
| P218       | Male   | 56  | T3N1cM0  | III   | Left               | Adenoca.          | Moderated              | Yes               | Yes                 | pMMR       | Yes | NA                     |
| P219       | Female | 61  | T4aN0M0  | II    | Right              | Adenoca.          | Well                   | No                | No                  | pMMR       | Yes | NA                     |
| P220       | Male   | 62  | T1N0M0   | I     | Left               | Adenoca.          | Well                   | No                | No                  | NA         | No  | NA                     |
| P221       | Female | 51  | T3N1bM0  | III   | Left               | Adenoca.          | Well                   | Yes               | Yes                 | pMMR       | Yes | 14                     |
| P222       | Male   | 52  | T2N0M0   | I     | Left               | Mucinous Adenoca. | Moderated              | Yes               | No                  | pMMR       | No  | NA                     |
| P223       | Female | 57  | T3N1bM0  | III   | Left               | Adenoca.          | Moderated              | No                | No                  | pMMR       | Yes | NA                     |
| P224       | Male   | 69  | T3N0M0   | II    | Right              | Mucinous Adenoca. | Poor                   | No                | No                  | dMMR       | No  | NA                     |
| P225       | Male   | 40  | T2N0M0   | I     | Left               | SRCC              | Poor                   | No                | No                  | dMMR       | No  | NA                     |

**eTable 1. Clinicopathologic Patient Characteristics**

| Patient ID | Gender | Age | TNM      | Stage | Primary tumor site | Histological type | Tumors differentiation | Vascular invasion | Perineural invasion | MMR Status | ACT | Relapse after OP month |
|------------|--------|-----|----------|-------|--------------------|-------------------|------------------------|-------------------|---------------------|------------|-----|------------------------|
| P226       | Female | 68  | T3N2bM0  | III   | Left               | Adenoca.          | Moderated              | No                | No                  | pMMR       | Yes | NA                     |
| P227       | Male   | 61  | T3N1bM0  | III   | Left               | Adenoca.          | Moderated              | Yes               | Yes                 | pMMR       | Yes | NA                     |
| P228       | Male   | 45  | T2N1aM0  | III   | Left               | Adenoca.          | Moderated              | No                | No                  | pMMR       | Yes | NA                     |
| P229       | Male   | 54  | T2N1bM0  | III   | Left               | Adenoca.          | Moderated              | No                | No                  | pMMR       | Yes | NA                     |
| P230       | Male   | 65  | T2N0M0   | I     | Left               | Adenoca.          | Moderated              | Yes               | No                  | pMMR       | No  | NA                     |
| P231       | Male   | 58  | T3N1cM0  | III   | Left               | Adenoca.          | Moderated              | Yes               | Yes                 | pMMR       | Yes | NA                     |
| P232       | Male   | 64  | T3N0M0   | II    | Right              | Mucinous Adenoca. | Poor                   | No                | No                  | dMMR       | No  | NA                     |
| P233       | Female | 55  | T4aN1bM0 | III   | Left               | Mucinous Adenoca. | Poor                   | No                | No                  | pMMR       | Yes | NA                     |
| P234       | Male   | 58  | T3N1cM0  | III   | Left               | Adenoca.          | Moderated              | Yes               | Yes                 | pMMR       | Yes | NA                     |
| P235       | Female | 43  | T1N0M0   | I     | Left               | Adenoca.          | Moderated              | No                | No                  | pMMR       | No  | NA                     |
| P236       | Male   | 64  | T2N0M0   | I     | Left               | Mucinous Adenoca. | Poor                   | No                | No                  | pMMR       | No  | NA                     |
| P237       | Female | 51  | T1N0M0   | I     | Left               | Adenoca.          | Well                   | No                | No                  | NA         | No  | NA                     |
| P238       | Female | 63  | T3N0M0   | II    | Left               | Adenoca.          | Moderated              | No                | No                  | pMMR       | Yes | NA                     |
| P239       | Male   | 65  | T3N0M0   | II    | Left               | Adenoca.          | Moderated              | No                | No                  | pMMR       | Yes | NA                     |
| P240       | Male   | 72  | T3N1aM0  | III   | Right              | Adenoca.          | Moderated              | No                | No                  | pMMR       | Yes | NA                     |
| P241       | Male   | 57  | T3N1aM0  | III   | Left               | Adenoca.          | Moderated              | Yes               | Yes                 | pMMR       | Yes | NA                     |
| P242       | Male   | 64  | T4aN2aM0 | III   | Left               | Adenoca.          | Moderated              | Yes               | Yes                 | pMMR       | Yes | NA                     |
| P243       | Male   | 75  | T3N1bM0  | III   | Left               | Mucinous Adenoca. | Moderated              | No                | No                  | pMMR       | Yes | NA                     |
| P244       | Male   | 73  | T3N1bM0  | III   | Left               | Adenoca.          | Moderated              | Yes               | No                  | pMMR       | Yes | NA                     |
| P245       | Male   | 73  | T3N2aM0  | III   | Left               | Mucinous Adenoca. | Poor                   | No                | No                  | dMMR       | Yes | NA                     |
| P246       | Female | 51  | T3N0M0   | II    | Left               | Adenoca.          | Moderated              | No                | No                  | pMMR       | Yes | NA                     |
| P247       | Female | 29  | T2N0M0   | I     | Left               | Adenoca.          | Moderated              | No                | No                  | pMMR       | No  | NA                     |
| P248       | Male   | 65  | T2N1aM0  | III   | Left               | Mucinous Adenoca. | Moderated              | Yes               | No                  | pMMR       | Yes | 8                      |
| P249       | Male   | 57  | T3N0M0   | II    | Right              | Adenoca.          | Moderated              | No                | No                  | pMMR       | Yes | NA                     |
| P250       | Female | 73  | T2N1bM0  | III   | Left               | Adenoca.          | Moderated              | No                | No                  | pMMR       | Yes | NA                     |

**eTable 1. Clinicopathologic Patient Characteristics**

| Patient ID | Gender | Age | TNM      | Stage | Primary tumor site | Histological type | Tumors differentiation | Vascular invasion | Perineural invasion | MMR Status | ACT | Relapse after OP month |
|------------|--------|-----|----------|-------|--------------------|-------------------|------------------------|-------------------|---------------------|------------|-----|------------------------|
| P251       | Male   | 53  | T3N0M0   | II    | Left               | Adenoca.          | Moderated              | No                | Yes                 | pMMR       | Yes | NA                     |
| P252       | Male   | 58  | T3N0M0   | II    | Left               | Adenoca.          | Moderated              | Yes               | Yes                 | pMMR       | Yes | NA                     |
| P253       | Female | 64  | T3N0M0   | II    | Right              | Adenoca.          | Poor                   | No                | No                  | pMMR       | Yes | NA                     |
| P254       | Female | 68  | T2N0M0   | I     | Left               | Mucinous Adenoca. | Well                   | No                | No                  | pMMR       | No  | NA                     |
| P255       | Male   | 67  | T3N0M0   | II    | Left               | Adenoca.          | Moderated              | Yes               | Yes                 | pMMR       | Yes | NA                     |
| P256       | Female | 58  | T4bN1aM0 | III   | Left               | Adenoca.          | Moderated              | Yes               | Yes                 | pMMR       | Yes | NA                     |
| P257       | Male   | 70  | T2N0M0   | I     | Left               | Adenoca.          | Moderated              | No                | No                  | pMMR       | No  | NA                     |
| P258       | Female | 55  | T2N0M0   | I     | Left               | Adenoca.          | Moderated              | No                | No                  | pMMR       | No  | NA                     |
| P259       | Female | 66  | T3N0M0   | II    | Left               | Adenoca.          | Moderated              | No                | No                  | pMMR       | Yes | NA                     |
| P260       | Female | 68  | T3N0M0   | II    | Left               | Adenoca.          | Moderated              | No                | Yes                 | pMMR       | Yes | 5                      |
| P261       | Male   | 51  | T2N1bM0  | III   | Left               | Adenoca.          | Moderated              | Yes               | Yes                 | pMMR       | Yes | NA                     |
| P262       | Female | 72  | T3N2aM0  | III   | Left               | Adenoca.          | Moderated              | Yes               | Yes                 | pMMR       | Yes | 8                      |
| P263       | Male   | 52  | T3N0M0   | II    | Left               | Adenoca.          | Moderated              | Yes               | No                  | pMMR       | Yes | NA                     |
| P264       | Male   | 52  | T3N0M0   | II    | Left               | Adenoca.          | Moderated              | No                | No                  | pMMR       | Yes | NA                     |
| P265       | Male   | 58  | T2N0M0   | I     | Left               | Adenoca.          | Moderated              | No                | No                  | dMMR       | No  | NA                     |
| P266       | Female | 50  | T3N0M0   | II    | Right              | Adenoca.          | Moderated              | No                | No                  | pMMR       | Yes | NA                     |
| P267       | Male   | 52  | T2N0M0   | I     | Left               | Adenoca.          | Poor                   | No                | No                  | pMMR       | No  | NA                     |
| P268       | Female | 75  | T2N1bM0  | III   | Left               | Mucinous Adenoca. | Moderated              | Yes               | No                  | pMMR       | Yes | NA                     |
| P269       | Male   | 57  | T4aN2aM0 | III   | Left               | Adenoca.          | Moderated              | Yes               | Yes                 | pMMR       | Yes | NA                     |
| P270       | Female | 70  | T2N0M0   | I     | Left               | Adenoca.          | Moderated              | No                | No                  | pMMR       | No  | NA                     |
| P271       | Female | 51  | T4aN1cM0 | III   | Right              | Adenoca.          | Moderated              | Yes               | No                  | pMMR       | Yes | NA                     |
| P272       | Male   | 61  | T3N0M0   | II    | Left               | Adenoca.          | Poor                   | Yes               | Yes                 | pMMR       | Yes | NA                     |
| P273       | Male   | 58  | T2N2aM0  | III   | Left               | Adenoca.          | Moderated              | Yes               | Yes                 | pMMR       | Yes | NA                     |
| P274       | Male   | 44  | T3N1bM0  | III   | Left               | Adenoca.          | Poor                   | Yes               | Yes                 | pMMR       | Yes | 4                      |
| P275       | Female | 52  | T2N0M0   | I     | Left               | Adenoca.          | Well                   | No                | No                  | pMMR       | No  | NA                     |



**eTable 1. Clinicopathologic Patient Characteristics**

| Patient ID | Gender | Age | TNM      | Stage | Primary tumor site | Histological type | Tumors differentiation | Vascular invasion | Perineural invasion | MMR Status | ACT | Relapse after OP month |
|------------|--------|-----|----------|-------|--------------------|-------------------|------------------------|-------------------|---------------------|------------|-----|------------------------|
| P276       | Male   | 65  | T3N0M0   | II    | Right              | Adenoca.          | Moderated              | NA                | NA                  | NA         | Yes | NA                     |
| P277       | Female | 70  | T4N1M0   | III   | Left               | Adenoca.          | Moderated              | Yes               | Yes                 | NA         | Yes | NA                     |
| P278       | Female | 67  | T3N0M0   | II    | Right              | Adenoca.          | Moderated              | NA                | NA                  | NA         | Yes | NA                     |
| P279       | Female | 49  | T4N0M0   | II    | Left               | Adenoca.          | Moderated              | No                | Yes                 | NA         | No  | NA                     |
| P280       | Female | 69  | T1N0M0   | I     | Left               | NA                | NA                     | NA                | NA                  | NA         | No  | NA                     |
| P281       | Female | 63  | T3N1M0   | III   | Left               | Adenoca.          | Moderated              | Yes               | No                  | pMMR       | No  | NA                     |
| P282       | Female | 67  | T4N0M0   | II    | Left               | Adenoca.          | Moderated              | NA                | NA                  | NA         | No  | NA                     |
| P283       | Female | 58  | T4N0M0   | II    | Left               | Adenoca.          | Moderated              | Yes               | NA                  | NA         | Yes | NA                     |
| P284       | Female | 45  | T2N1aM0  | III   | Left               | Adenoca.          | Moderated              | Yes               | No                  | NA         | Yes | NA                     |
| P285       | Male   | 75  | T3N0M0   | II    | Right              | Mucinous Adenoca. | Moderated              | No                | Yes                 | dMMR       | Yes | NA                     |
| P286       | Male   | 72  | T4N0M0   | II    | Left               | Adenoca.          | Moderated              | NA                | NA                  | pMMR       | Yes | NA                     |
| P287       | Male   | 64  | T4N0M0   | II    | Left               | Adenoca.          | Moderated              | No                | No                  | NA         | No  | 6                      |
| P288       | Female | 63  | T4N1M0   | III   | Left               | Adenoca.          | Moderated              | Yes               | No                  | NA         | Yes | NA                     |
| P289       | Female | 78  | T4N2M0   | III   | Right              | Mucinous Adenoca. | Moderated              | Yes               | Yes                 | pMMR       | No  | NA                     |
| P290       | Female | 71  | T1N1M0   | III   | Left               | Adenoca.          | Moderated              | No                | No                  | NA         | Yes | NA                     |
| P291       | Male   | 62  | T4N1M0   | III   | Left               | Adenoca.          | Moderated              | No                | No                  | NA         | Yes | NA                     |
| P292       | Male   | 79  | T4N1M0   | III   | Left               | Mucinous Adenoca. | Poor                   | Yes               | Yes                 | pMMR       | No  | 5                      |
| P293       | Male   | 60  | T4aN0M0  | II    | Left               | Adenoca.          | Moderated              | No                | No                  | pMMR       | Yes | 3                      |
| P294       | Female | 58  | T3N1cM0  | III   | Left               | Adenoca.          | Poor                   | Yes               | Yes                 | pMMR       | Yes | 3                      |
| P295       | Male   | 48  | T3N1bM0  | III   | Left               | Adenoca.          | Poor                   | Yes               | No                  | pMMR       | Yes | 3                      |
| P296       | Male   | 66  | T4aN1bM0 | III   | Left               | Adenoca.          | Moderated              | Yes               | Yes                 | pMMR       | Yes | 3                      |
| P297       | Male   | 66  | T4aN2bM0 | III   | Left               | Adenoca.          | Moderated              | Yes               | Yes                 | pMMR       | Yes | 3                      |
| P298       | Male   | 51  | T3N1aM0  | III   | Left               | Mucinous Adenoca. | Moderated              | Yes               | Yes                 | pMMR       | Yes | 3                      |
| P299       | Female | 54  | T3N1cM0  | III   | Left               | Adenoca.          | Moderated              | Yes               | No                  | pMMR       | Yes | 3                      |

---

MMR: mismatch repair; ACT: adjuvant chemotherapy; OP: operation; Adenoca.: Adenocarcinoma; Mucinous adenoca.: Mucinous adenocarcinoma; SRCC: Signet-ring cell carcinoma.

eTable 2. Characteristics of Enrolled Patients

| Characteristics                      | All patients<br>(n=299) | Recurrence patients<br>(n=55) | Recurrence-free patients<br>(n=244) |
|--------------------------------------|-------------------------|-------------------------------|-------------------------------------|
| <b>Gender</b>                        |                         |                               |                                     |
| Male                                 | 186 (62.2%)             | 35 (63.6%)                    | 151 (61.9%)                         |
| Female                               | 113 (37.8%)             | 20 (36.4%)                    | 93 (38.1%)                          |
| <b>Age, years</b>                    |                         |                               |                                     |
| Mean (SD)                            | 60.1 (10.3)             | 60.4 (10.5)                   | 60.1 (10.3)                         |
| Median [Min, Max]                    | 61.0 [29.0, 80.0]       | 63.0 [37.0, 80.0]             | 60.0 [29.0, 80.0]                   |
| <b>Location</b>                      |                         |                               |                                     |
| Left                                 | 228 (76.3%)             | 42 (76.4%)                    | 186 (76.2%)                         |
| Right                                | 54 (18.1%)              | 11 (20.0%)                    | 43 (17.6%)                          |
| Unknown                              | 17 (5.7%)               | 2 (3.6%)                      | 15 (6.1%)                           |
| <b>Histological type</b>             |                         |                               |                                     |
| Adenoca.                             | 242 (80.9%)             | 41 (74.5%)                    | 201 (82.4%)                         |
| Other (Mucinous<br>Adenoca. or SRCC) | 40 (13.4%)              | 12 (21.8%)                    | 28 (11.5%)                          |
| Unknown                              | 17 (5.7%)               | 2 (3.6%)                      | 15 (6.1%)                           |
| <b>Stage</b>                         |                         |                               |                                     |
| I                                    | 64 (21.4%)              | 6 (10.9%)                     | 58 (23.8%)                          |
| II                                   | 98 (32.8%)              | 11 (20.0%)                    | 87 (35.7%)                          |
| III                                  | 137 (45.8%)             | 38 (69.1%)                    | 99 (40.6%)                          |

SD: standard deviation; Min: minimum; Max: maximum; Adenoca.: adenocarcinoma; SRCC: Signet-ring cell carcinoma.

**eTable 3.** Circulating Tumor DNA Results for All 1228 Plasma Samples

| Patient ID | Months after surgery | Septin9_1 Call | Septin9_2 Call | BCAT1 Call | IKZF1 Call | BCAN Call | VAV3 Call | ColonAiQ Call |
|------------|----------------------|----------------|----------------|------------|------------|-----------|-----------|---------------|
| P1         | 0.0                  | positive       | positive       | negative   | positive   | negative  | negative  | positive      |
| P1         | 0.7                  | positive       | positive       | positive   | positive   | negative  | positive  | positive      |
| P1         | 6.9                  | negative       | positive       | negative   | negative   | negative  | negative  | positive      |
| P1         | 16.3                 | negative       | negative       | negative   | negative   | negative  | negative  | negative      |
| P2         | 0.0                  | positive       | positive       | positive   | positive   | positive  | positive  | positive      |
| P2         | 1.0                  | positive       | positive       | positive   | positive   | positive  | positive  | positive      |
| P3         | 0.0                  | positive       | negative       | negative   | negative   | negative  | negative  | positive      |
| P3         | 0.8                  | positive       | negative       | negative   | negative   | negative  | negative  | positive      |
| P3         | 7.9                  | negative       | negative       | negative   | negative   | negative  | negative  | negative      |
| P4         | 0.0                  | positive       | negative       | negative   | positive   | positive  | negative  | positive      |
| P4         | 1.0                  | negative       | negative       | negative   | positive   | negative  | positive  | positive      |
| P5         | 0.0                  | positive       | negative       | positive   | positive   | positive  | positive  | positive      |
| P5         | 0.6                  | positive       | negative       | positive   | positive   | negative  | positive  | positive      |
| P6         | 0.0                  | positive       | positive       | positive   | positive   | negative  | negative  | positive      |
| P6         | 0.8                  | positive       | negative       | negative   | negative   | negative  | negative  | positive      |
| P7         | 0.0                  | positive       | negative       | negative   | negative   | positive  | negative  | positive      |
| P7         | 0.7                  | negative       | negative       | negative   | negative   | negative  | negative  | negative      |
| P7         | 7.7                  | negative       | negative       | negative   | negative   | negative  | negative  | negative      |
| P7         | 11.0                 | negative       | negative       | negative   | negative   | negative  | negative  | negative      |
| P7         | 16.8                 | negative       | negative       | negative   | negative   | negative  | negative  | negative      |
| P7         | 19.9                 | negative       | negative       | positive   | negative   | negative  | negative  | positive      |
| P7         | 23.3                 | negative       | negative       | negative   | negative   | negative  | negative  | negative      |
| P8         | 0.0                  | positive       | positive       | negative   | negative   | positive  | positive  | positive      |
| P8         | 0.6                  | negative       | negative       | negative   | negative   | negative  | negative  | negative      |
| P9         | 0.0                  | positive       | negative       | negative   | negative   | negative  | negative  | positive      |
| P9         | 0.6                  | negative       | negative       | negative   | negative   | negative  | negative  | negative      |
| P9         | 7.2                  | negative       | negative       | negative   | negative   | negative  | negative  | negative      |
| P9         | 11.3                 | negative       | negative       | negative   | negative   | negative  | negative  | negative      |
| P9         | 15.1                 | negative       | negative       | negative   | negative   | negative  | negative  | negative      |
| P9         | 19.0                 | negative       | negative       | negative   | negative   | negative  | negative  | negative      |
| P10        | 0.0                  | positive       | positive       | negative   | negative   | negative  | negative  | positive      |
| P10        | 0.7                  | negative       | negative       | negative   | negative   | negative  | negative  | negative      |
| P10        | 8.4                  | negative       | negative       | negative   | negative   | negative  | negative  | negative      |
| P10        | 14.3                 | negative       | negative       | positive   | negative   | negative  | negative  | positive      |
| P11        | 0.0                  | positive       | negative       | negative   | negative   | positive  | negative  | positive      |
| P11        | 0.7                  | negative       | negative       | negative   | negative   | negative  | negative  | negative      |
| P11        | 6.8                  | negative       | negative       | negative   | negative   | negative  | negative  | negative      |
| P12        | 0.0                  | positive       | positive       | negative   | positive   | negative  | negative  | positive      |
| P12        | 0.6                  | negative       | negative       | negative   | negative   | positive  | negative  | positive      |

**eTable 3.** Circulating Tumor DNA Results for All 1228 Plasma Samples

| Patient ID | Months after surgery | Septin9_1 Call | Septin9_2 Call | BCAT1 Call | IKZF1 Call | BCAN Call | VAV3 Call | ColonAiQ Call |
|------------|----------------------|----------------|----------------|------------|------------|-----------|-----------|---------------|
| P12        | 6.4                  | negative       | negative       | negative   | negative   | negative  | negative  | negative      |
| P12        | 12.7                 | negative       | negative       | negative   | negative   | negative  | negative  | negative      |
| P12        | 15.7                 | negative       | negative       | negative   | negative   | negative  | negative  | negative      |
| P12        | 19.7                 | negative       | negative       | positive   | positive   | positive  | positive  | positive      |
| P12        | 23.0                 | negative       | negative       | negative   | negative   | positive  | negative  | positive      |
| P13        | 0.0                  | negative       | negative       | negative   | negative   | negative  | positive  | positive      |
| P13        | 0.6                  | negative       | negative       | negative   | negative   | negative  | negative  | negative      |
| P13        | 5.0                  | negative       | negative       | negative   | negative   | negative  | negative  | negative      |
| P13        | 8.1                  | negative       | negative       | negative   | negative   | negative  | negative  | negative      |
| P13        | 12.1                 | negative       | negative       | negative   | negative   | negative  | negative  | negative      |
| P13        | 15.5                 | negative       | negative       | negative   | negative   | negative  | negative  | negative      |
| P13        | 22.1                 | negative       | negative       | negative   | negative   | negative  | negative  | negative      |
| P14        | 0.0                  | positive       | negative       | negative   | negative   | negative  | negative  | positive      |
| P14        | 0.6                  | negative       | negative       | negative   | negative   | negative  | negative  | negative      |
| P14        | 6.2                  | negative       | negative       | negative   | negative   | negative  | negative  | negative      |
| P14        | 10.0                 | negative       | negative       | negative   | negative   | negative  | negative  | negative      |
| P14        | 14.0                 | negative       | negative       | negative   | positive   | negative  | negative  | positive      |
| P15        | 0.0                  | negative       | negative       | negative   | negative   | negative  | negative  | negative      |
| P15        | 0.7                  | negative       | negative       | negative   | negative   | negative  | negative  | negative      |
| P15        | 7.7                  | negative       | negative       | negative   | negative   | negative  | negative  | negative      |
| P15        | 10.5                 | negative       | negative       | negative   | negative   | negative  | negative  | negative      |
| P15        | 14.5                 | negative       | negative       | negative   | negative   | negative  | negative  | negative      |
| P15        | 16.4                 | negative       | negative       | negative   | negative   | negative  | negative  | negative      |
| P15        | 19.4                 | negative       | negative       | negative   | negative   | negative  | negative  | negative      |
| P15        | 22.2                 | negative       | negative       | negative   | negative   | positive  | negative  | positive      |
| P16        | 0.0                  | positive       | positive       | positive   | positive   | positive  | positive  | positive      |
| P16        | 0.7                  | positive       | positive       | positive   | positive   | positive  | positive  | positive      |
| P17        | 0.0                  | positive       | positive       | positive   | positive   | positive  | positive  | positive      |
| P17        | 0.6                  | negative       | negative       | negative   | negative   | negative  | negative  | negative      |
| P17        | 4.4                  | negative       | negative       | negative   | negative   | negative  | negative  | negative      |
| P17        | 7.2                  | negative       | negative       | negative   | negative   | negative  | negative  | negative      |
| P17        | 11.1                 | negative       | negative       | negative   | negative   | negative  | negative  | negative      |
| P17        | 13.5                 | negative       | negative       | negative   | negative   | negative  | negative  | negative      |
| P18        | 0.0                  | negative       | negative       | positive   | negative   | negative  | negative  | positive      |
| P18        | 1.1                  | negative       | negative       | negative   | negative   | negative  | negative  | negative      |
| P18        | 4.8                  | negative       | negative       | negative   | negative   | negative  | negative  | negative      |
| P18        | 7.5                  | negative       | negative       | negative   | negative   | negative  | negative  | negative      |
| P18        | 13.0                 | negative       | negative       | negative   | negative   | negative  | negative  | negative      |
| P18        | 15.5                 | negative       | negative       | negative   | negative   | negative  | negative  | negative      |

**eTable 3.** Circulating Tumor DNA Results for All 1228 Plasma Samples

| Patient ID | Months after surgery | Septin9_1 Call | Septin9_2 Call | BCAT1 Call | IKZF1 Call | BCAN Call | VAV3 Call | ColonAiQ Call |
|------------|----------------------|----------------|----------------|------------|------------|-----------|-----------|---------------|
| P18        | 19.3                 | negative       | negative       | negative   | negative   | negative  | negative  | negative      |
| P19        | 0.0                  | positive       | positive       | positive   | positive   | positive  | positive  | positive      |
| P19        | 0.7                  | positive       | positive       | positive   | positive   | negative  | positive  | positive      |
| P19        | 4.5                  | negative       | negative       | negative   | negative   | negative  | negative  | negative      |
| P19        | 7.0                  | positive       | negative       | negative   | negative   | negative  | positive  | positive      |
| P19        | 12.2                 | positive       | negative       | negative   | negative   | negative  | negative  | positive      |
| P20        | 0.0                  | positive       | positive       | positive   | positive   | positive  | negative  | positive      |
| P20        | 1.0                  | negative       | negative       | negative   | positive   | positive  | positive  | positive      |
| P21        | 0.0                  | positive       | negative       | negative   | positive   | negative  | negative  | positive      |
| P21        | 0.7                  | negative       | negative       | negative   | negative   | negative  | negative  | negative      |
| P21        | 12.3                 | negative       | negative       | negative   | negative   | negative  | negative  | negative      |
| P22        | 0.0                  | negative       | negative       | negative   | negative   | negative  | negative  | negative      |
| P22        | 0.9                  | negative       | negative       | negative   | negative   | negative  | negative  | negative      |
| P22        | 4.6                  | negative       | negative       | negative   | negative   | negative  | negative  | negative      |
| P22        | 7.4                  | negative       | negative       | negative   | negative   | negative  | negative  | negative      |
| P22        | 11.2                 | negative       | negative       | negative   | negative   | negative  | negative  | negative      |
| P23        | 0.0                  | positive       | positive       | positive   | positive   | negative  | positive  | positive      |
| P23        | 0.7                  | negative       | negative       | negative   | positive   | negative  | negative  | positive      |
| P23        | 3.9                  | negative       | negative       | negative   | negative   | negative  | negative  | negative      |
| P23        | 7.0                  | negative       | negative       | negative   | negative   | negative  | positive  | positive      |
| P23        | 10.8                 | negative       | negative       | negative   | negative   | negative  | negative  | negative      |
| P23        | 13.6                 | negative       | negative       | negative   | negative   | negative  | negative  | negative      |
| P24        | 0.0                  | negative       | negative       | negative   | negative   | negative  | negative  | negative      |
| P24        | 0.7                  | negative       | negative       | negative   | negative   | negative  | negative  | negative      |
| P25        | 0.0                  | positive       | positive       | positive   | positive   | positive  | positive  | positive      |
| P25        | 0.7                  | negative       | negative       | negative   | negative   | negative  | negative  | negative      |
| P25        | 5.2                  | negative       | negative       | negative   | negative   | negative  | negative  | negative      |
| P25        | 6.6                  | negative       | negative       | negative   | negative   | negative  | negative  | negative      |
| P25        | 11.4                 | negative       | negative       | negative   | negative   | negative  | negative  | negative      |
| P26        | 0.0                  | positive       | negative       | negative   | negative   | negative  | negative  | positive      |
| P26        | 0.8                  | negative       | negative       | negative   | negative   | negative  | negative  | negative      |
| P26        | 3.9                  | negative       | negative       | negative   | negative   | negative  | negative  | negative      |
| P27        | 0.0                  | positive       | positive       | negative   | negative   | negative  | negative  | positive      |
| P27        | 0.8                  | positive       | positive       | negative   | negative   | negative  | negative  | positive      |
| P27        | 12.5                 | negative       | negative       | negative   | negative   | negative  | negative  | negative      |
| P27        | 18.3                 | negative       | negative       | negative   | negative   | negative  | negative  | negative      |
| P28        | 0.0                  | positive       | positive       | positive   | negative   | positive  | negative  | positive      |
| P28        | 0.8                  | positive       | negative       | negative   | negative   | negative  | negative  | positive      |
| P28        | 4.3                  | negative       | negative       | negative   | negative   | negative  | negative  | negative      |

**eTable 3.** Circulating Tumor DNA Results for All 1228 Plasma Samples

| Patient ID | Months after surgery | Septin9_1 Call | Septin9_2 Call | BCAT1 Call | IKZF1 Call | BCAN Call | VAV3 Call | ColonAiQ Call |
|------------|----------------------|----------------|----------------|------------|------------|-----------|-----------|---------------|
| P28        | 13.1                 | negative       | negative       | negative   | negative   | negative  | negative  | negative      |
| P28        | 17.0                 | negative       | negative       | negative   | negative   | negative  | negative  | negative      |
| P29        | 0.0                  | negative       | negative       | positive   | negative   | negative  | negative  | positive      |
| P29        | 0.8                  | positive       | negative       | negative   | negative   | negative  | negative  | positive      |
| P29        | 4.8                  | negative       | negative       | negative   | negative   | negative  | negative  | negative      |
| P29        | 8.1                  | negative       | negative       | negative   | negative   | negative  | negative  | negative      |
| P29        | 13.1                 | negative       | negative       | negative   | negative   | negative  | negative  | negative      |
| P29        | 16.0                 | negative       | negative       | negative   | negative   | negative  | negative  | negative      |
| P29        | 21.4                 | negative       | negative       | negative   | negative   | negative  | negative  | negative      |
| P30        | 0.0                  | positive       | positive       | positive   | positive   | negative  | negative  | positive      |
| P30        | 0.7                  | negative       | negative       | negative   | negative   | negative  | negative  | negative      |
| P30        | 7.7                  | negative       | negative       | negative   | negative   | negative  | negative  | negative      |
| P30        | 12.4                 | negative       | negative       | negative   | negative   | negative  | negative  | negative      |
| P30        | 15.8                 | negative       | negative       | negative   | negative   | negative  | negative  | negative      |
| P30        | 19.9                 | negative       | negative       | negative   | negative   | negative  | negative  | negative      |
| P31        | 0.0                  | negative       | negative       | negative   | negative   | positive  | negative  | positive      |
| P31        | 1.2                  | negative       | negative       | negative   | negative   | positive  | negative  | positive      |
| P31        | 5.3                  | negative       | negative       | negative   | negative   | negative  | negative  | negative      |
| P31        | 7.3                  | negative       | negative       | negative   | negative   | positive  | negative  | positive      |
| P31        | 10.6                 | negative       | negative       | negative   | negative   | negative  | negative  | negative      |
| P31        | 15.0                 | negative       | negative       | negative   | negative   | negative  | negative  | negative      |
| P31        | 18.6                 | negative       | negative       | negative   | negative   | positive  | negative  | positive      |
| P32        | 0.0                  | positive       | positive       | positive   | positive   | positive  | positive  | positive      |
| P32        | 1.0                  | negative       | positive       | negative   | negative   | negative  | negative  | positive      |
| P32        | 4.5                  | negative       | negative       | negative   | negative   | negative  | negative  | negative      |
| P32        | 6.8                  | negative       | positive       | negative   | negative   | negative  | positive  | positive      |
| P33        | 0.0                  | positive       | positive       | positive   | positive   | positive  | positive  | positive      |
| P33        | 0.7                  | positive       | positive       | positive   | positive   | positive  | positive  | positive      |
| P33        | 4.7                  | positive       | positive       | positive   | positive   | negative  | positive  | positive      |
| P34        | 0.0                  | negative       | negative       | negative   | negative   | negative  | negative  | negative      |
| P34        | 0.6                  | negative       | negative       | negative   | negative   | negative  | negative  | negative      |
| P34        | 4.5                  | negative       | negative       | negative   | negative   | negative  | negative  | negative      |
| P34        | 6.7                  | negative       | negative       | negative   | negative   | negative  | negative  | negative      |
| P34        | 10.7                 | positive       | positive       | negative   | negative   | negative  | negative  | positive      |
| P34        | 13.3                 | negative       | negative       | negative   | negative   | negative  | negative  | negative      |
| P35        | 0.0                  | negative       | negative       | positive   | negative   | negative  | negative  | positive      |
| P35        | 0.9                  | negative       | negative       | negative   | negative   | positive  | negative  | positive      |
| P35        | 4.8                  | negative       | negative       | negative   | negative   | negative  | negative  | negative      |
| P35        | 7.9                  | negative       | negative       | negative   | negative   | negative  | negative  | negative      |

**eTable 3.** Circulating Tumor DNA Results for All 1228 Plasma Samples

| Patient ID | Months after surgery | Septin9_1 Call | Septin9_2 Call | BCAT1 Call | IKZF1 Call | BCAN Call | VAV3 Call | ColonAiQ Call |
|------------|----------------------|----------------|----------------|------------|------------|-----------|-----------|---------------|
| P35        | 11.8                 | negative       | negative       | negative   | negative   | negative  | negative  | negative      |
| P35        | 15.4                 | negative       | negative       | negative   | negative   | negative  | positive  | positive      |
| P36        | 0.0                  | negative       | negative       | negative   | negative   | negative  | negative  | negative      |
| P36        | 0.6                  | negative       | negative       | negative   | negative   | negative  | negative  | negative      |
| P37        | 0.0                  | negative       | negative       | negative   | negative   | negative  | negative  | negative      |
| P37        | 0.9                  | negative       | negative       | negative   | negative   | negative  | negative  | negative      |
| P37        | 4.6                  | negative       | negative       | negative   | negative   | negative  | negative  | negative      |
| P37        | 6.9                  | negative       | negative       | negative   | negative   | negative  | negative  | negative      |
| P37        | 13.0                 | negative       | negative       | negative   | negative   | negative  | negative  | negative      |
| P37        | 17.9                 | negative       | negative       | negative   | negative   | negative  | negative  | negative      |
| P38        | 0.0                  | negative       | negative       | negative   | negative   | negative  | positive  | positive      |
| P38        | 1.1                  | negative       | negative       | negative   | negative   | negative  | negative  | negative      |
| P38        | 7.2                  | negative       | negative       | negative   | negative   | negative  | negative  | negative      |
| P39        | 0.0                  | negative       | negative       | negative   | negative   | negative  | negative  | negative      |
| P39        | 0.9                  | negative       | negative       | negative   | negative   | negative  | negative  | negative      |
| P39        | 4.4                  | negative       | negative       | negative   | negative   | negative  | negative  | negative      |
| P39        | 7.4                  | negative       | negative       | negative   | negative   | negative  | negative  | negative      |
| P39        | 12.6                 | negative       | negative       | negative   | negative   | negative  | negative  | negative      |
| P39        | 15.7                 | negative       | negative       | negative   | negative   | negative  | negative  | negative      |
| P40        | 0.0                  | positive       | negative       | negative   | negative   | negative  | negative  | positive      |
| P40        | 0.7                  | positive       | negative       | negative   | negative   | negative  | negative  | positive      |
| P40        | 4.2                  | negative       | negative       | negative   | negative   | negative  | negative  | negative      |
| P41        | 0.0                  | positive       | positive       | positive   | positive   | positive  | negative  | positive      |
| P41        | 2.1                  | negative       | negative       | negative   | negative   | negative  | negative  | negative      |
| P41        | 4.4                  | negative       | negative       | negative   | negative   | negative  | negative  | negative      |
| P41        | 11.9                 | negative       | negative       | negative   | negative   | negative  | negative  | negative      |
| P41        | 15.9                 | negative       | negative       | negative   | negative   | negative  | negative  | negative      |
| P42        | 0.0                  | positive       | negative       | negative   | negative   | negative  | negative  | positive      |
| P42        | 0.8                  | negative       | negative       | negative   | negative   | negative  | negative  | negative      |
| P43        | 0.0                  | positive       | positive       | positive   | negative   | positive  | negative  | positive      |
| P43        | 0.9                  | negative       | negative       | negative   | negative   | negative  | negative  | negative      |
| P43        | 11.4                 | negative       | negative       | negative   | negative   | negative  | negative  | negative      |
| P44        | 0.0                  | positive       | positive       | negative   | negative   | positive  | negative  | positive      |
| P44        | 0.8                  | positive       | negative       | negative   | positive   | negative  | negative  | positive      |
| P44        | 6.9                  | negative       | negative       | negative   | negative   | positive  | negative  | positive      |
| P45        | 0.0                  | negative       | negative       | negative   | negative   | negative  | negative  | negative      |
| P45        | 0.7                  | negative       | negative       | negative   | negative   | negative  | negative  | negative      |
| P45        | 3.7                  | negative       | negative       | negative   | positive   | negative  | negative  | positive      |
| P45        | 6.5                  | negative       | negative       | negative   | negative   | negative  | negative  | negative      |



**eTable 3.** Circulating Tumor DNA Results for All 1228 Plasma Samples

| Patient ID | Months after surgery | Septin9_1 Call | Septin9_2 Call | BCAT1 Call | IKZF1 Call | BCAN Call | VAV3 Call | ColonAiQ Call |
|------------|----------------------|----------------|----------------|------------|------------|-----------|-----------|---------------|
| P45        | 12.3                 | negative       | negative       | negative   | negative   | negative  | negative  | negative      |
| P45        | 17.9                 | negative       | negative       | negative   | negative   | negative  | negative  | negative      |
| P46        | 0.0                  | positive       | negative       | positive   | negative   | negative  | negative  | positive      |
| P46        | 0.7                  | negative       | negative       | negative   | negative   | negative  | negative  | negative      |
| P46        | 3.5                  | negative       | negative       | negative   | negative   | negative  | negative  | negative      |
| P46        | 6.5                  | negative       | negative       | positive   | negative   | negative  | negative  | positive      |
| P46        | 10.2                 | negative       | negative       | negative   | negative   | negative  | negative  | negative      |
| P46        | 13.8                 | negative       | negative       | negative   | negative   | negative  | negative  | negative      |
| P46        | 17.1                 | positive       | negative       | negative   | negative   | negative  | negative  | positive      |
| P46        | 20.3                 | negative       | negative       | negative   | negative   | negative  | negative  | negative      |
| P47        | 0.0                  | positive       | positive       | positive   | positive   | negative  | negative  | positive      |
| P47        | 0.7                  | negative       | negative       | negative   | negative   | negative  | negative  | negative      |
| P48        | 0.0                  | negative       | negative       | negative   | negative   | negative  | negative  | negative      |
| P48        | 0.7                  | negative       | negative       | negative   | negative   | negative  | negative  | negative      |
| P49        | 0.0                  | positive       | positive       | positive   | negative   | positive  | negative  | positive      |
| P49        | 0.8                  | positive       | negative       | positive   | positive   | negative  | negative  | positive      |
| P49        | 4.2                  | negative       | negative       | negative   | negative   | negative  | negative  | negative      |
| P50        | 0.0                  | negative       | negative       | negative   | negative   | negative  | positive  | positive      |
| P50        | 0.7                  | negative       | negative       | negative   | negative   | negative  | negative  | negative      |
| P50        | 3.8                  | negative       | negative       | negative   | negative   | positive  | negative  | positive      |
| P50        | 6.1                  | negative       | negative       | negative   | negative   | negative  | negative  | negative      |
| P50        | 9.7                  | negative       | negative       | negative   | negative   | negative  | negative  | negative      |
| P50        | 12.7                 | negative       | negative       | negative   | negative   | negative  | negative  | negative      |
| P50        | 16.1                 | negative       | negative       | negative   | negative   | negative  | negative  | negative      |
| P50        | 19.5                 | negative       | negative       | negative   | negative   | negative  | negative  | negative      |
| P51        | 0.0                  | negative       | negative       | negative   | negative   | negative  | negative  | negative      |
| P51        | 0.7                  | negative       | negative       | negative   | negative   | negative  | negative  | negative      |
| P51        | 4.2                  | positive       | positive       | positive   | positive   | negative  | positive  | positive      |
| P51        | 8.0                  | negative       | negative       | negative   | negative   | negative  | negative  | negative      |
| P51        | 11.3                 | negative       | negative       | negative   | negative   | negative  | negative  | negative      |
| P51        | 12.9                 | negative       | negative       | negative   | negative   | negative  | negative  | negative      |
| P51        | 15.7                 | negative       | negative       | negative   | positive   | positive  | negative  | positive      |
| P52        | 0.0                  | positive       | positive       | positive   | negative   | positive  | negative  | positive      |
| P52        | 0.7                  | negative       | negative       | negative   | negative   | negative  | negative  | negative      |
| P53        | 0.0                  | positive       | negative       | positive   | positive   | positive  | negative  | positive      |
| P53        | 0.7                  | negative       | negative       | negative   | negative   | negative  | negative  | negative      |
| P53        | 3.5                  | negative       | negative       | negative   | negative   | negative  | negative  | negative      |
| P53        | 6.3                  | negative       | negative       | negative   | negative   | negative  | negative  | negative      |
| P53        | 17.9                 | negative       | negative       | negative   | negative   | negative  | negative  | negative      |

**eTable 3.** Circulating Tumor DNA Results for All 1228 Plasma Samples

| Patient ID | Months after surgery | Septin9_1 Call | Septin9_2 Call | BCAT1 Call | IKZF1 Call | BCAN Call | VAV3 Call | ColonAiQ Call |
|------------|----------------------|----------------|----------------|------------|------------|-----------|-----------|---------------|
| P54        | 0.0                  | negative       | negative       | negative   | negative   | negative  | negative  | negative      |
| P54        | 0.7                  | negative       | negative       | negative   | negative   | negative  | negative  | negative      |
| P54        | 10.5                 | negative       | negative       | negative   | negative   | negative  | negative  | negative      |
| P55        | 0.0                  | negative       | negative       | negative   | negative   | negative  | negative  | negative      |
| P55        | 0.7                  | negative       | negative       | negative   | negative   | negative  | negative  | negative      |
| P56        | 0.0                  | negative       | negative       | negative   | negative   | negative  | negative  | negative      |
| P56        | 0.7                  | negative       | negative       | negative   | negative   | negative  | negative  | negative      |
| P56        | 5.2                  | negative       | negative       | negative   | negative   | negative  | negative  | negative      |
| P56        | 7.5                  | negative       | negative       | negative   | negative   | negative  | negative  | negative      |
| P56        | 17.3                 | negative       | negative       | negative   | negative   | negative  | negative  | negative      |
| P57        | 0.0                  | negative       | negative       | negative   | negative   | negative  | negative  | negative      |
| P57        | 0.9                  | negative       | negative       | negative   | negative   | negative  | negative  | negative      |
| P57        | 7.3                  | negative       | negative       | negative   | negative   | negative  | negative  | negative      |
| P57        | 10.9                 | negative       | negative       | negative   | negative   | negative  | negative  | negative      |
| P57        | 12.9                 | negative       | negative       | negative   | negative   | negative  | negative  | negative      |
| P57        | 16.3                 | negative       | negative       | negative   | negative   | negative  | negative  | negative      |
| P57        | 19.5                 | negative       | negative       | negative   | negative   | negative  | negative  | negative      |
| P58        | 0.0                  | positive       | positive       | positive   | positive   | positive  | positive  | positive      |
| P58        | 0.7                  | negative       | negative       | negative   | negative   | negative  | negative  | negative      |
| P58        | 4.2                  | negative       | negative       | negative   | negative   | negative  | negative  | negative      |
| P58        | 7.5                  | negative       | negative       | negative   | negative   | negative  | negative  | negative      |
| P58        | 11.0                 | negative       | negative       | negative   | negative   | negative  | negative  | negative      |
| P58        | 11.9                 | negative       | negative       | negative   | negative   | negative  | negative  | negative      |
| P58        | 14.5                 | negative       | negative       | negative   | negative   | negative  | negative  | negative      |
| P58        | 17.3                 | negative       | negative       | negative   | negative   | negative  | negative  | negative      |
| P58        | 20.2                 | negative       | negative       | negative   | negative   | negative  | negative  | negative      |
| P59        | 0.0                  | positive       | negative       | negative   | positive   | negative  | negative  | positive      |
| P59        | 0.6                  | negative       | negative       | negative   | negative   | negative  | negative  | negative      |
| P60        | 0.0                  | positive       | positive       | positive   | positive   | positive  | positive  | positive      |
| P60        | 0.7                  | negative       | negative       | negative   | negative   | negative  | negative  | negative      |
| P60        | 4.9                  | negative       | negative       | negative   | negative   | negative  | negative  | negative      |
| P60        | 10.7                 | negative       | negative       | negative   | negative   | negative  | negative  | negative      |
| P61        | 0.0                  | positive       | negative       | negative   | negative   | negative  | negative  | positive      |
| P61        | 0.8                  | negative       | negative       | negative   | negative   | negative  | negative  | negative      |
| P61        | 4.3                  | negative       | negative       | negative   | negative   | negative  | negative  | negative      |
| P61        | 11.1                 | negative       | negative       | negative   | negative   | negative  | negative  | negative      |
| P61        | 14.1                 | negative       | negative       | negative   | negative   | negative  | negative  | negative      |
| P61        | 20.0                 | negative       | negative       | negative   | negative   | negative  | negative  | negative      |
| P62        | 0.0                  | positive       | positive       | positive   | positive   | positive  | positive  | positive      |

**eTable 3.** Circulating Tumor DNA Results for All 1228 Plasma Samples

| Patient ID | Months after surgery | Septin9_1 Call | Septin9_2 Call | BCAT1 Call | IKZF1 Call | BCAN Call | VAV3 Call | ColonAiQ Call |
|------------|----------------------|----------------|----------------|------------|------------|-----------|-----------|---------------|
| P62        | 1.0                  | positive       | negative       | positive   | positive   | negative  | positive  | positive      |
| P63        | 0.0                  | negative       | negative       | negative   | negative   | negative  | positive  | positive      |
| P63        | 0.7                  | negative       | negative       | negative   | negative   | negative  | negative  | negative      |
| P64        | 0.0                  | positive       | negative       | negative   | negative   | negative  | negative  | positive      |
| P64        | 0.7                  | negative       | negative       | negative   | negative   | negative  | negative  | negative      |
| P64        | 3.7                  | negative       | negative       | negative   | negative   | positive  | negative  | positive      |
| P64        | 5.8                  | negative       | negative       | negative   | negative   | negative  | negative  | negative      |
| P64        | 11.4                 | negative       | negative       | negative   | negative   | negative  | negative  | negative      |
| P65        | 0.0                  | negative       | negative       | negative   | positive   | negative  | negative  | positive      |
| P65        | 0.7                  | negative       | negative       | negative   | negative   | negative  | negative  | negative      |
| P65        | 10.6                 | negative       | negative       | negative   | negative   | negative  | negative  | negative      |
| P65        | 13.5                 | negative       | negative       | negative   | negative   | negative  | negative  | negative      |
| P65        | 17.0                 | negative       | negative       | negative   | negative   | negative  | negative  | negative      |
| P65        | 19.8                 | negative       | negative       | negative   | negative   | negative  | negative  | negative      |
| P66        | 0.0                  | positive       | negative       | positive   | negative   | positive  | negative  | positive      |
| P66        | 1.1                  | negative       | negative       | negative   | positive   | negative  | negative  | positive      |
| P67        | 0.0                  | positive       | negative       | positive   | negative   | negative  | negative  | positive      |
| P67        | 6.8                  | negative       | negative       | negative   | negative   | negative  | negative  | negative      |
| P68        | 0.0                  | positive       | negative       | positive   | negative   | negative  | negative  | positive      |
| P68        | 7.3                  | negative       | negative       | negative   | negative   | negative  | negative  | negative      |
| P68        | 10.9                 | negative       | negative       | negative   | positive   | negative  | negative  | positive      |
| P68        | 14.9                 | negative       | negative       | negative   | negative   | negative  | negative  | negative      |
| P68        | 18.9                 | negative       | negative       | negative   | negative   | negative  | negative  | negative      |
| P69        | 0.0                  | positive       | negative       | negative   | negative   | negative  | negative  | positive      |
| P69        | 7.2                  | negative       | negative       | negative   | negative   | positive  | negative  | positive      |
| P69        | 10.7                 | negative       | negative       | negative   | negative   | negative  | negative  | negative      |
| P69        | 15.9                 | negative       | negative       | negative   | negative   | negative  | negative  | negative      |
| P70        | 0.0                  | positive       | positive       | positive   | positive   | positive  | positive  | positive      |
| P70        | 1.6                  | negative       | negative       | negative   | negative   | negative  | negative  | negative      |
| P70        | 11.1                 | negative       | negative       | negative   | negative   | negative  | negative  | negative      |
| P70        | 16.4                 | negative       | negative       | negative   | negative   | negative  | negative  | negative      |
| P70        | 20.0                 | negative       | negative       | negative   | negative   | negative  | negative  | negative      |
| P71        | 0.0                  | negative       | negative       | negative   | positive   | negative  | negative  | positive      |
| P71        | 1.1                  | negative       | negative       | negative   | negative   | negative  | negative  | negative      |
| P71        | 5.6                  | negative       | negative       | negative   | negative   | negative  | negative  | negative      |
| P71        | 11.2                 | negative       | negative       | negative   | negative   | negative  | negative  | negative      |
| P72        | 0.0                  | positive       | negative       | negative   | positive   | negative  | negative  | positive      |
| P72        | 0.9                  | negative       | negative       | negative   | negative   | negative  | negative  | negative      |
| P72        | 5.1                  | negative       | negative       | negative   | negative   | negative  | negative  | negative      |

**eTable 3.** Circulating Tumor DNA Results for All 1228 Plasma Samples

| Patient ID | Months after surgery | Septin9_1 Call | Septin9_2 Call | BCAT1 Call | IKZF1 Call | BCAN Call | VAV3 Call | ColonAiQ Call |
|------------|----------------------|----------------|----------------|------------|------------|-----------|-----------|---------------|
| P72        | 7.4                  | negative       | negative       | negative   | negative   | negative  | negative  | negative      |
| P73        | 0.0                  | negative       | negative       | negative   | negative   | negative  | negative  | negative      |
| P73        | 1.1                  | negative       | negative       | negative   | negative   | negative  | negative  | negative      |
| P73        | 3.9                  | negative       | negative       | negative   | negative   | negative  | negative  | negative      |
| P73        | 6.9                  | negative       | negative       | positive   | negative   | negative  | negative  | positive      |
| P73        | 10.7                 | negative       | negative       | positive   | negative   | negative  | negative  | positive      |
| P73        | 13.2                 | negative       | negative       | negative   | negative   | negative  | negative  | negative      |
| P73        | 16.2                 | negative       | negative       | negative   | negative   | negative  | negative  | negative      |
| P73        | 18.8                 | negative       | negative       | negative   | negative   | negative  | negative  | negative      |
| P74        | 0.0                  | positive       | positive       | positive   | positive   | positive  | positive  | positive      |
| P74        | 1.0                  | negative       | negative       | negative   | negative   | negative  | negative  | negative      |
| P74        | 5.2                  | negative       | negative       | negative   | negative   | negative  | negative  | negative      |
| P74        | 10.0                 | negative       | negative       | negative   | negative   | negative  | negative  | negative      |
| P74        | 15.3                 | negative       | negative       | negative   | negative   | negative  | negative  | negative      |
| P75        | 0.0                  | positive       | negative       | negative   | negative   | negative  | negative  | positive      |
| P75        | 0.9                  | negative       | negative       | negative   | negative   | positive  | negative  | positive      |
| P75        | 3.7                  | negative       | negative       | negative   | negative   | negative  | negative  | negative      |
| P75        | 11.2                 | negative       | negative       | negative   | negative   | negative  | negative  | negative      |
| P75        | 13.5                 | negative       | negative       | negative   | negative   | negative  | negative  | negative      |
| P75        | 16.9                 | negative       | negative       | negative   | negative   | negative  | negative  | negative      |
| P75        | 19.4                 | negative       | negative       | negative   | negative   | negative  | negative  | negative      |
| P76        | 0.0                  | positive       | positive       | positive   | positive   | positive  | positive  | positive      |
| P76        | 1.1                  | negative       | negative       | negative   | negative   | negative  | negative  | negative      |
| P76        | 5.5                  | negative       | negative       | negative   | negative   | negative  | negative  | negative      |
| P76        | 8.9                  | negative       | negative       | negative   | negative   | negative  | negative  | negative      |
| P76        | 13.1                 | negative       | negative       | negative   | negative   | negative  | negative  | negative      |
| P76        | 20.0                 | positive       | positive       | negative   | negative   | negative  | negative  | positive      |
| P77        | 0.0                  | negative       | negative       | negative   | negative   | negative  | negative  | negative      |
| P77        | 0.9                  | negative       | negative       | positive   | negative   | negative  | negative  | positive      |
| P77        | 3.3                  | negative       | negative       | negative   | negative   | negative  | negative  | negative      |
| P77        | 6.7                  | negative       | negative       | negative   | negative   | negative  | negative  | negative      |
| P77        | 10.5                 | negative       | negative       | negative   | negative   | negative  | negative  | negative      |
| P77        | 13.7                 | negative       | negative       | negative   | negative   | negative  | negative  | negative      |
| P77        | 16.8                 | negative       | negative       | negative   | negative   | negative  | negative  | negative      |
| P77        | 19.8                 | negative       | negative       | negative   | negative   | negative  | negative  | negative      |
| P78        | 0.0                  | negative       | negative       | negative   | negative   | negative  | negative  | negative      |
| P78        | 0.9                  | negative       | negative       | negative   | negative   | negative  | negative  | negative      |
| P78        | 3.9                  | negative       | negative       | negative   | negative   | negative  | negative  | negative      |
| P78        | 7.0                  | negative       | negative       | negative   | negative   | negative  | negative  | negative      |

**eTable 3.** Circulating Tumor DNA Results for All 1228 Plasma Samples

| Patient ID | Months after surgery | Septin9_1 Call | Septin9_2 Call | BCAT1 Call | IKZF1 Call | BCAN Call | VAV3 Call | ColonAiQ Call |
|------------|----------------------|----------------|----------------|------------|------------|-----------|-----------|---------------|
| P78        | 11.0                 | negative       | negative       | negative   | negative   | negative  | negative  | negative      |
| P78        | 16.5                 | negative       | positive       | negative   | negative   | negative  | negative  | positive      |
| P79        | 0.0                  | negative       | negative       | negative   | negative   | negative  | negative  | negative      |
| P79        | 1.5                  | negative       | positive       | negative   | negative   | negative  | negative  | positive      |
| P79        | 3.9                  | negative       | negative       | negative   | negative   | negative  | negative  | negative      |
| P80        | 0.0                  | positive       | positive       | negative   | negative   | negative  | positive  | positive      |
| P80        | 1.1                  | negative       | negative       | negative   | negative   | negative  | negative  | negative      |
| P80        | 10.5                 | negative       | negative       | negative   | negative   | negative  | negative  | negative      |
| P80        | 14.0                 | negative       | negative       | negative   | negative   | negative  | negative  | negative      |
| P80        | 17.3                 | negative       | negative       | negative   | negative   | negative  | negative  | negative      |
| P81        | 0.0                  | negative       | negative       | negative   | negative   | negative  | negative  | negative      |
| P81        | 1.2                  | negative       | negative       | negative   | negative   | negative  | negative  | negative      |
| P81        | 4.5                  | negative       | negative       | negative   | negative   | negative  | negative  | negative      |
| P81        | 6.7                  | negative       | negative       | negative   | negative   | negative  | negative  | negative      |
| P81        | 12.6                 | negative       | negative       | negative   | negative   | negative  | negative  | negative      |
| P81        | 18.9                 | negative       | negative       | negative   | negative   | negative  | negative  | negative      |
| P82        | 0.0                  | positive       | positive       | positive   | positive   | positive  | negative  | positive      |
| P82        | 1.0                  | positive       | positive       | positive   | positive   | positive  | negative  | positive      |
| P83        | 0.0                  | positive       | positive       | positive   | positive   | positive  | positive  | positive      |
| P83        | 0.9                  | negative       | negative       | negative   | negative   | negative  | negative  | negative      |
| P84        | 0.0                  | positive       | negative       | negative   | positive   | negative  | positive  | positive      |
| P84        | 0.9                  | negative       | negative       | negative   | negative   | negative  | negative  | negative      |
| P84        | 15.2                 | negative       | negative       | negative   | negative   | negative  | negative  | negative      |
| P85        | 0.0                  | positive       | negative       | negative   | negative   | negative  | negative  | positive      |
| P85        | 0.7                  | negative       | negative       | negative   | negative   | negative  | negative  | negative      |
| P86        | 0.0                  | negative       | negative       | negative   | positive   | negative  | negative  | positive      |
| P86        | 0.7                  | positive       | positive       | negative   | negative   | negative  | negative  | positive      |
| P87        | 0.0                  | negative       | negative       | negative   | positive   | negative  | negative  | positive      |
| P87        | 0.8                  | negative       | negative       | negative   | negative   | negative  | negative  | negative      |
| P87        | 3.4                  | negative       | negative       | negative   | negative   | negative  | negative  | negative      |
| P87        | 6.7                  | negative       | negative       | negative   | negative   | negative  | negative  | negative      |
| P87        | 10.6                 | negative       | negative       | negative   | negative   | negative  | negative  | negative      |
| P87        | 15.5                 | negative       | negative       | negative   | negative   | negative  | negative  | negative      |
| P88        | 0.0                  | positive       | positive       | positive   | positive   | negative  | negative  | positive      |
| P88        | 0.6                  | negative       | negative       | negative   | negative   | negative  | negative  | negative      |
| P88        | 5.8                  | negative       | negative       | negative   | negative   | negative  | negative  | negative      |
| P88        | 11.3                 | negative       | negative       | negative   | negative   | negative  | negative  | negative      |
| P88        | 19.3                 | negative       | negative       | negative   | negative   | negative  | negative  | negative      |
| P89        | 0.0                  | negative       | negative       | negative   | positive   | negative  | negative  | positive      |

**eTable 3.** Circulating Tumor DNA Results for All 1228 Plasma Samples

| Patient ID | Months after surgery | Septin9_1 Call | Septin9_2 Call | BCAT1 Call | IKZF1 Call | BCAN Call | VAV3 Call | ColonAiQ Call |
|------------|----------------------|----------------|----------------|------------|------------|-----------|-----------|---------------|
| P89        | 0.9                  | negative       | negative       | negative   | negative   | negative  | negative  | negative      |
| P89        | 10.3                 | negative       | negative       | negative   | negative   | negative  | negative  | negative      |
| P89        | 14.4                 | negative       | negative       | negative   | negative   | negative  | negative  | negative      |
| P89        | 17.7                 | negative       | negative       | negative   | negative   | negative  | negative  | negative      |
| P90        | 0.0                  | negative       | negative       | negative   | positive   | negative  | positive  | positive      |
| P90        | 1.0                  | negative       | negative       | positive   | negative   | negative  | negative  | positive      |
| P90        | 5.4                  | negative       | negative       | negative   | negative   | negative  | negative  | negative      |
| P91        | 0.0                  | negative       | negative       | negative   | positive   | negative  | negative  | positive      |
| P91        | 0.6                  | negative       | negative       | negative   | negative   | negative  | negative  | negative      |
| P91        | 5.6                  | negative       | negative       | negative   | negative   | negative  | negative  | negative      |
| P91        | 10.5                 | negative       | negative       | negative   | negative   | negative  | negative  | negative      |
| P91        | 13.2                 | negative       | negative       | negative   | negative   | negative  | negative  | negative      |
| P92        | 0.0                  | positive       | negative       | negative   | positive   | negative  | negative  | positive      |
| P92        | 0.7                  | negative       | negative       | negative   | negative   | negative  | negative  | negative      |
| P92        | 4.5                  | negative       | negative       | negative   | negative   | negative  | negative  | negative      |
| P92        | 8.7                  | negative       | negative       | negative   | positive   | negative  | negative  | positive      |
| P92        | 11.9                 | negative       | negative       | negative   | negative   | negative  | positive  | positive      |
| P93        | 0.0                  | positive       | negative       | negative   | positive   | negative  | positive  | positive      |
| P93        | 0.9                  | negative       | negative       | negative   | negative   | negative  | negative  | negative      |
| P93        | 6.7                  | negative       | negative       | negative   | negative   | negative  | negative  | negative      |
| P93        | 10.2                 | negative       | negative       | negative   | negative   | negative  | negative  | negative      |
| P93        | 13.2                 | negative       | negative       | negative   | negative   | negative  | negative  | negative      |
| P93        | 16.4                 | negative       | negative       | negative   | negative   | negative  | negative  | negative      |
| P93        | 19.3                 | negative       | negative       | negative   | negative   | negative  | negative  | negative      |
| P94        | 0.0                  | negative       | negative       | negative   | positive   | negative  | positive  | positive      |
| P94        | 0.7                  | negative       | negative       | negative   | negative   | negative  | negative  | negative      |
| P94        | 9.9                  | negative       | negative       | negative   | negative   | negative  | negative  | negative      |
| P95        | 0.0                  | negative       | negative       | negative   | negative   | negative  | negative  | negative      |
| P95        | 1.1                  | negative       | negative       | negative   | negative   | negative  | negative  | negative      |
| P95        | 3.9                  | negative       | negative       | negative   | negative   | negative  | negative  | negative      |
| P95        | 6.9                  | negative       | negative       | negative   | negative   | negative  | negative  | negative      |
| P95        | 9.6                  | negative       | negative       | negative   | negative   | negative  | negative  | negative      |
| P95        | 14.9                 | negative       | negative       | negative   | negative   | negative  | negative  | negative      |
| P96        | 0.0                  | positive       | negative       | negative   | positive   | negative  | positive  | positive      |
| P96        | 0.8                  | negative       | negative       | negative   | negative   | negative  | negative  | negative      |
| P96        | 3.4                  | negative       | negative       | negative   | negative   | negative  | negative  | negative      |
| P96        | 6.7                  | negative       | negative       | negative   | negative   | negative  | negative  | negative      |
| P96        | 13.4                 | negative       | negative       | positive   | negative   | negative  | negative  | positive      |
| P96        | 16.5                 | negative       | negative       | negative   | negative   | negative  | negative  | negative      |

**eTable 3.** Circulating Tumor DNA Results for All 1228 Plasma Samples

| Patient ID | Months after surgery | Septin9_1 Call | Septin9_2 Call | BCAT1 Call | IKZF1 Call | BCAN Call | VAV3 Call | ColonAiQ Call |
|------------|----------------------|----------------|----------------|------------|------------|-----------|-----------|---------------|
| P96        | 19.3                 | negative       | negative       | negative   | negative   | negative  | negative  | negative      |
| P97        | 0.0                  | positive       | positive       | positive   | positive   | positive  | positive  | positive      |
| P97        | 0.9                  | positive       | positive       | positive   | positive   | positive  | positive  | positive      |
| P98        | 0.0                  | positive       | negative       | positive   | positive   | negative  | positive  | positive      |
| P98        | 0.9                  | negative       | negative       | negative   | negative   | negative  | negative  | negative      |
| P98        | 3.9                  | negative       | negative       | negative   | negative   | negative  | negative  | negative      |
| P98        | 5.3                  | negative       | negative       | negative   | negative   | negative  | negative  | negative      |
| P98        | 10.3                 | negative       | negative       | positive   | negative   | negative  | negative  | positive      |
| P99        | 0.0                  | positive       | negative       | positive   | positive   | positive  | positive  | positive      |
| P99        | 0.6                  | negative       | negative       | positive   | negative   | negative  | negative  | positive      |
| P99        | 10.4                 | negative       | negative       | negative   | negative   | negative  | negative  | negative      |
| P99        | 13.5                 | negative       | negative       | negative   | negative   | negative  | negative  | negative      |
| P99        | 16.6                 | negative       | negative       | negative   | negative   | negative  | negative  | negative      |
| P99        | 19.5                 | negative       | negative       | negative   | negative   | negative  | negative  | negative      |
| P100       | 0.0                  | negative       | negative       | negative   | positive   | negative  | negative  | positive      |
| P100       | 0.8                  | negative       | negative       | negative   | negative   | negative  | negative  | negative      |
| P101       | 0.0                  | negative       | negative       | negative   | positive   | negative  | negative  | positive      |
| P101       | 0.7                  | negative       | negative       | negative   | negative   | negative  | negative  | negative      |
| P101       | 8.8                  | negative       | negative       | negative   | negative   | negative  | negative  | negative      |
| P102       | 0.0                  | negative       | negative       | positive   | positive   | negative  | negative  | positive      |
| P102       | 1.2                  | positive       | positive       | positive   | negative   | negative  | negative  | positive      |
| P102       | 5.1                  | negative       | negative       | negative   | negative   | negative  | negative  | negative      |
| P102       | 8.9                  | positive       | positive       | negative   | negative   | negative  | negative  | positive      |
| P103       | 0.0                  | negative       | negative       | positive   | positive   | negative  | negative  | positive      |
| P103       | 0.9                  | negative       | negative       | negative   | negative   | negative  | negative  | negative      |
| P103       | 4.7                  | negative       | negative       | negative   | negative   | negative  | negative  | negative      |
| P103       | 10.9                 | negative       | positive       | negative   | negative   | negative  | negative  | positive      |
| P104       | 0.0                  | negative       | negative       | negative   | negative   | negative  | negative  | negative      |
| P104       | 0.8                  | negative       | negative       | negative   | negative   | negative  | negative  | negative      |
| P104       | 10.5                 | negative       | negative       | negative   | negative   | negative  | negative  | negative      |
| P105       | 0.0                  | negative       | negative       | negative   | positive   | negative  | negative  | positive      |
| P105       | 0.9                  | negative       | negative       | negative   | negative   | negative  | negative  | negative      |
| P105       | 10.2                 | negative       | negative       | negative   | negative   | negative  | negative  | negative      |
| P105       | 14.1                 | positive       | negative       | positive   | negative   | negative  | negative  | positive      |
| P106       | 0.0                  | positive       | negative       | negative   | negative   | negative  | positive  | positive      |
| P106       | 0.9                  | negative       | negative       | negative   | negative   | negative  | negative  | negative      |
| P106       | 6.7                  | negative       | negative       | negative   | negative   | negative  | negative  | negative      |
| P106       | 10.9                 | negative       | negative       | negative   | negative   | negative  | negative  | negative      |
| P106       | 13.7                 | negative       | negative       | negative   | negative   | negative  | negative  | negative      |

**eTable 3.** Circulating Tumor DNA Results for All 1228 Plasma Samples

| Patient ID | Months after surgery | Septin9_1 Call | Septin9_2 Call | BCAT1 Call | IKZF1 Call | BCAN Call | VAV3 Call | ColonAiQ Call |
|------------|----------------------|----------------|----------------|------------|------------|-----------|-----------|---------------|
| P107       | 0.0                  | negative       | negative       | negative   | negative   | negative  | negative  | negative      |
| P107       | 0.9                  | negative       | negative       | negative   | negative   | negative  | negative  | negative      |
| P107       | 7.0                  | negative       | negative       | negative   | negative   | negative  | negative  | negative      |
| P107       | 9.8                  | negative       | negative       | negative   | negative   | negative  | negative  | negative      |
| P107       | 19.1                 | positive       | positive       | negative   | negative   | negative  | negative  | positive      |
| P108       | 0.0                  | negative       | negative       | negative   | negative   | negative  | negative  | negative      |
| P108       | 0.9                  | negative       | negative       | negative   | negative   | negative  | negative  | negative      |
| P108       | 4.4                  | negative       | negative       | negative   | negative   | negative  | negative  | negative      |
| P108       | 8.4                  | negative       | negative       | negative   | negative   | negative  | negative  | negative      |
| P109       | 0.0                  | negative       | negative       | negative   | positive   | negative  | negative  | positive      |
| P109       | 0.7                  | negative       | negative       | negative   | negative   | negative  | negative  | negative      |
| P109       | 4.9                  | negative       | negative       | negative   | negative   | negative  | negative  | negative      |
| P110       | 0.0                  | positive       | positive       | positive   | positive   | positive  | positive  | positive      |
| P110       | 0.8                  | negative       | negative       | negative   | negative   | negative  | negative  | negative      |
| P111       | 0.0                  | positive       | positive       | positive   | positive   | positive  | positive  | positive      |
| P111       | 1.0                  | negative       | negative       | negative   | negative   | negative  | negative  | negative      |
| P111       | 4.5                  | negative       | negative       | negative   | negative   | negative  | negative  | negative      |
| P112       | 0.0                  | positive       | positive       | positive   | positive   | negative  | positive  | positive      |
| P112       | 0.7                  | negative       | negative       | negative   | negative   | negative  | negative  | negative      |
| P112       | 10.1                 | negative       | negative       | negative   | negative   | negative  | negative  | negative      |
| P112       | 12.7                 | negative       | negative       | negative   | negative   | negative  | negative  | negative      |
| P113       | 0.0                  | positive       | negative       | negative   | negative   | negative  | negative  | positive      |
| P113       | 0.7                  | negative       | negative       | negative   | negative   | negative  | negative  | negative      |
| P113       | 6.1                  | negative       | negative       | negative   | negative   | negative  | negative  | negative      |
| P113       | 9.8                  | negative       | negative       | negative   | negative   | negative  | negative  | negative      |
| P113       | 12.9                 | negative       | negative       | negative   | negative   | negative  | negative  | negative      |
| P114       | 0.0                  | positive       | positive       | positive   | negative   | negative  | negative  | positive      |
| P114       | 0.7                  | negative       | negative       | negative   | negative   | negative  | negative  | negative      |
| P114       | 4.0                  | negative       | negative       | negative   | negative   | negative  | negative  | negative      |
| P114       | 10.3                 | negative       | negative       | negative   | negative   | negative  | negative  | negative      |
| P114       | 12.9                 | negative       | negative       | negative   | negative   | negative  | negative  | negative      |
| P114       | 16.1                 | negative       | negative       | negative   | negative   | negative  | negative  | negative      |
| P114       | 19.3                 | negative       | negative       | negative   | negative   | negative  | negative  | negative      |
| P115       | 0.0                  | negative       | negative       | negative   | positive   | negative  | negative  | positive      |
| P115       | 0.7                  | negative       | positive       | negative   | negative   | negative  | negative  | positive      |
| P116       | 0.0                  | positive       | negative       | negative   | negative   | negative  | negative  | positive      |
| P116       | 1.0                  | negative       | negative       | negative   | negative   | negative  | negative  | negative      |
| P117       | 0.0                  | negative       | negative       | negative   | negative   | negative  | negative  | negative      |
| P117       | 0.7                  | negative       | negative       | negative   | negative   | negative  | negative  | negative      |



**eTable 3.** Circulating Tumor DNA Results for All 1228 Plasma Samples

| Patient ID | Months after surgery | Septin9_1 Call | Septin9_2 Call | BCAT1 Call | IKZF1 Call | BCAN Call | VAV3 Call | ColonAiQ Call |
|------------|----------------------|----------------|----------------|------------|------------|-----------|-----------|---------------|
| P118       | 0.0                  | positive       | positive       | positive   | positive   | positive  | negative  | positive      |
| P118       | 0.8                  | positive       | positive       | positive   | positive   | positive  | negative  | positive      |
| P119       | 0.0                  | negative       | negative       | negative   | negative   | negative  | positive  | positive      |
| P119       | 0.6                  | negative       | negative       | negative   | negative   | negative  | negative  | negative      |
| P119       | 4.4                  | negative       | negative       | negative   | negative   | negative  | negative  | negative      |
| P119       | 8.8                  | negative       | negative       | negative   | negative   | negative  | negative  | negative      |
| P119       | 11.6                 | negative       | negative       | negative   | negative   | negative  | negative  | negative      |
| P119       | 15.1                 | negative       | negative       | negative   | negative   | negative  | negative  | negative      |
| P119       | 18.1                 | negative       | negative       | negative   | negative   | negative  | negative  | negative      |
| P120       | 0.0                  | positive       | positive       | positive   | positive   | positive  | positive  | positive      |
| P120       | 0.7                  | negative       | negative       | negative   | negative   | negative  | negative  | negative      |
| P120       | 3.9                  | negative       | negative       | negative   | negative   | negative  | negative  | negative      |
| P120       | 5.8                  | negative       | negative       | negative   | negative   | negative  | negative  | negative      |
| P120       | 11.9                 | negative       | negative       | negative   | negative   | negative  | negative  | negative      |
| P120       | 15.8                 | negative       | negative       | negative   | negative   | negative  | negative  | negative      |
| P121       | 0.0                  | negative       | negative       | negative   | negative   | negative  | negative  | negative      |
| P121       | 0.6                  | negative       | negative       | negative   | negative   | negative  | negative  | negative      |
| P121       | 3.4                  | negative       | negative       | negative   | negative   | negative  | negative  | negative      |
| P121       | 8.1                  | negative       | negative       | negative   | negative   | negative  | negative  | negative      |
| P121       | 12.6                 | negative       | negative       | negative   | negative   | negative  | negative  | negative      |
| P121       | 16.5                 | negative       | negative       | negative   | negative   | negative  | negative  | negative      |
| P122       | 0.0                  | positive       | positive       | positive   | positive   | positive  | positive  | positive      |
| P122       | 0.7                  | negative       | negative       | negative   | negative   | negative  | negative  | negative      |
| P122       | 3.7                  | negative       | positive       | negative   | negative   | negative  | negative  | positive      |
| P122       | 6.1                  | negative       | negative       | negative   | negative   | positive  | negative  | positive      |
| P122       | 10.7                 | negative       | negative       | negative   | negative   | negative  | negative  | negative      |
| P122       | 13.7                 | negative       | negative       | negative   | negative   | negative  | negative  | negative      |
| P122       | 16.8                 | positive       | positive       | negative   | negative   | negative  | negative  | positive      |
| P123       | 0.0                  | positive       | negative       | negative   | negative   | negative  | positive  | positive      |
| P123       | 7.1                  | negative       | negative       | negative   | negative   | negative  | negative  | negative      |
| P124       | 0.0                  | positive       | positive       | positive   | positive   | negative  | negative  | positive      |
| P124       | 8.0                  | negative       | negative       | negative   | negative   | positive  | negative  | positive      |
| P125       | 0.0                  | positive       | positive       | positive   | positive   | negative  | positive  | positive      |
| P125       | 10.2                 | negative       | negative       | negative   | negative   | negative  | negative  | negative      |
| P126       | 0.0                  | positive       | negative       | negative   | negative   | negative  | negative  | positive      |
| P126       | 8.7                  | negative       | negative       | negative   | negative   | negative  | negative  | negative      |
| P126       | 14.7                 | negative       | negative       | negative   | positive   | negative  | negative  | positive      |
| P127       | 0.0                  | negative       | negative       | negative   | negative   | negative  | positive  | positive      |
| P127       | 8.0                  | negative       | negative       | negative   | negative   | negative  | negative  | negative      |

**eTable 3.** Circulating Tumor DNA Results for All 1228 Plasma Samples

| Patient ID | Months after surgery | Septin9_1 Call | Septin9_2 Call | BCAT1 Call | IKZF1 Call | BCAN Call | VAV3 Call | ColonAiQ Call |
|------------|----------------------|----------------|----------------|------------|------------|-----------|-----------|---------------|
| P127       | 10.8                 | negative       | negative       | negative   | negative   | negative  | negative  | negative      |
| P127       | 14.0                 | negative       | negative       | negative   | negative   | negative  | negative  | negative      |
| P127       | 17.1                 | positive       | negative       | negative   | negative   | negative  | negative  | positive      |
| P128       | 0.0                  | positive       | negative       | negative   | negative   | negative  | negative  | positive      |
| P128       | 8.3                  | negative       | negative       | negative   | negative   | negative  | negative  | negative      |
| P128       | 11.1                 | negative       | negative       | negative   | negative   | negative  | negative  | negative      |
| P128       | 15.8                 | negative       | negative       | negative   | negative   | negative  | negative  | negative      |
| P128       | 19.0                 | negative       | negative       | negative   | negative   | positive  | negative  | positive      |
| P129       | 0.0                  | positive       | positive       | negative   | negative   | negative  | negative  | positive      |
| P129       | 8.0                  | negative       | negative       | negative   | negative   | negative  | negative  | negative      |
| P129       | 16.7                 | negative       | negative       | negative   | negative   | negative  | negative  | negative      |
| P129       | 19.1                 | negative       | negative       | positive   | negative   | negative  | negative  | positive      |
| P130       | 0.0                  | positive       | negative       | negative   | negative   | negative  | negative  | positive      |
| P130       | 7.8                  | negative       | negative       | negative   | negative   | negative  | negative  | negative      |
| P130       | 10.2                 | negative       | negative       | negative   | negative   | negative  | negative  | negative      |
| P130       | 14.2                 | negative       | negative       | negative   | positive   | negative  | negative  | positive      |
| P130       | 16.4                 | negative       | negative       | negative   | negative   | negative  | negative  | negative      |
| P130       | 19.3                 | negative       | negative       | negative   | negative   | negative  | negative  | negative      |
| P131       | 0.0                  | positive       | negative       | negative   | negative   | negative  | negative  | positive      |
| P131       | 12.3                 | negative       | negative       | negative   | negative   | negative  | negative  | negative      |
| P132       | 0.0                  | positive       | negative       | negative   | negative   | negative  | positive  | positive      |
| P132       | 7.8                  | negative       | negative       | negative   | negative   | negative  | negative  | negative      |
| P132       | 11.4                 | negative       | negative       | negative   | negative   | negative  | negative  | negative      |
| P132       | 15.6                 | negative       | negative       | negative   | negative   | negative  | negative  | negative      |
| P132       | 20.8                 | negative       | negative       | negative   | negative   | negative  | negative  | negative      |
| P133       | 0.0                  | positive       | positive       | negative   | positive   | negative  | positive  | positive      |
| P133       | 7.7                  | negative       | negative       | negative   | negative   | negative  | negative  | negative      |
| P133       | 10.2                 | negative       | negative       | negative   | negative   | negative  | negative  | negative      |
| P133       | 14.1                 | negative       | negative       | negative   | negative   | negative  | negative  | negative      |
| P133       | 17.1                 | negative       | negative       | negative   | negative   | negative  | negative  | negative      |
| P134       | 0.0                  | positive       | negative       | negative   | negative   | negative  | positive  | positive      |
| P134       | 7.5                  | negative       | negative       | negative   | negative   | negative  | negative  | negative      |
| P134       | 11.5                 | negative       | negative       | negative   | negative   | negative  | negative  | negative      |
| P134       | 14.5                 | negative       | negative       | negative   | negative   | negative  | negative  | negative      |
| P134       | 18.7                 | negative       | negative       | negative   | negative   | negative  | negative  | negative      |
| P135       | 0.0                  | negative       | negative       | negative   | negative   | negative  | negative  | negative      |
| P135       | 8.6                  | negative       | negative       | negative   | negative   | negative  | negative  | negative      |
| P136       | 0.0                  | negative       | negative       | positive   | positive   | positive  | negative  | positive      |
| P136       | 8.2                  | negative       | negative       | negative   | negative   | negative  | negative  | negative      |

**eTable 3.** Circulating Tumor DNA Results for All 1228 Plasma Samples

| Patient ID | Months after surgery | Septin9_1 Call | Septin9_2 Call | BCAT1 Call | IKZF1 Call | BCAN Call | VAV3 Call | ColonAiQ Call |
|------------|----------------------|----------------|----------------|------------|------------|-----------|-----------|---------------|
| P136       | 11.2                 | negative       | negative       | negative   | negative   | negative  | negative  | negative      |
| P136       | 16.2                 | negative       | negative       | negative   | negative   | negative  | negative  | negative      |
| P136       | 20.2                 | negative       | negative       | negative   | negative   | negative  | negative  | negative      |
| P137       | 0.0                  | negative       | negative       | negative   | negative   | negative  | negative  | negative      |
| P137       | 8.4                  | negative       | negative       | negative   | negative   | negative  | negative  | negative      |
| P137       | 14.0                 | negative       | negative       | negative   | negative   | negative  | negative  | negative      |
| P138       | 0.0                  | negative       | negative       | negative   | negative   | negative  | positive  | positive      |
| P138       | 7.7                  | negative       | negative       | negative   | negative   | positive  | negative  | positive      |
| P138       | 17.2                 | negative       | negative       | negative   | negative   | negative  | negative  | negative      |
| P139       | 0.0                  | positive       | positive       | negative   | negative   | positive  | positive  | positive      |
| P139       | 4.3                  | negative       | negative       | negative   | negative   | negative  | negative  | negative      |
| P140       | 0.0                  | positive       | positive       | positive   | positive   | positive  | positive  | positive      |
| P140       | 7.7                  | negative       | negative       | negative   | negative   | negative  | negative  | negative      |
| P141       | 0.0                  | negative       | negative       | negative   | negative   | negative  | negative  | negative      |
| P141       | 5.3                  | positive       | negative       | negative   | negative   | negative  | negative  | positive      |
| P142       | 0.0                  | negative       | negative       | positive   | positive   | negative  | positive  | positive      |
| P142       | 6.3                  | negative       | negative       | negative   | negative   | negative  | negative  | negative      |
| P142       | 15.3                 | negative       | negative       | negative   | negative   | negative  | negative  | negative      |
| P142       | 18.3                 | negative       | negative       | negative   | negative   | negative  | negative  | negative      |
| P143       | 0.0                  | negative       | negative       | negative   | negative   | negative  | negative  | negative      |
| P143       | 1.7                  | negative       | negative       | negative   | negative   | negative  | negative  | negative      |
| P144       | 0.0                  | positive       | negative       | negative   | positive   | negative  | negative  | positive      |
| P144       | 6.5                  | negative       | negative       | negative   | negative   | negative  | negative  | negative      |
| P145       | 0.0                  | negative       | negative       | negative   | negative   | negative  | negative  | negative      |
| P145       | 0.7                  | negative       | negative       | negative   | negative   | negative  | negative  | negative      |
| P146       | 0.0                  | positive       | negative       | negative   | positive   | negative  | negative  | positive      |
| P146       | 3.5                  | negative       | negative       | negative   | negative   | negative  | negative  | negative      |
| P146       | 7.8                  | negative       | negative       | negative   | negative   | negative  | negative  | negative      |
| P146       | 10.8                 | negative       | negative       | negative   | negative   | negative  | negative  | negative      |
| P147       | 0.0                  | negative       | negative       | negative   | negative   | negative  | negative  | negative      |
| P147       | 0.8                  | negative       | negative       | negative   | negative   | negative  | negative  | negative      |
| P147       | 9.4                  | negative       | negative       | negative   | negative   | negative  | negative  | negative      |
| P147       | 13.9                 | negative       | negative       | negative   | negative   | negative  | negative  | negative      |
| P148       | 0.0                  | negative       | negative       | negative   | negative   | negative  | negative  | negative      |
| P148       | 4.4                  | negative       | negative       | negative   | negative   | negative  | negative  | negative      |
| P148       | 8.8                  | negative       | negative       | negative   | negative   | negative  | negative  | negative      |
| P148       | 14.4                 | negative       | negative       | negative   | negative   | negative  | negative  | negative      |
| P148       | 17.5                 | negative       | negative       | negative   | negative   | negative  | negative  | negative      |
| P149       | 0.0                  | positive       | positive       | positive   | negative   | positive  | positive  | positive      |

**eTable 3.** Circulating Tumor DNA Results for All 1228 Plasma Samples

| Patient ID | Months after surgery | Septin9_1 Call | Septin9_2 Call | BCAT1 Call | IKZF1 Call | BCAN Call | VAV3 Call | ColonAiQ Call |
|------------|----------------------|----------------|----------------|------------|------------|-----------|-----------|---------------|
| P149       | 1.0                  | positive       | positive       | positive   | negative   | positive  | negative  | positive      |
| P149       | 4.6                  | negative       | negative       | negative   | negative   | negative  | negative  | negative      |
| P149       | 8.1                  | positive       | positive       | positive   | negative   | negative  | positive  | positive      |
| P149       | 10.4                 | positive       | negative       | negative   | negative   | negative  | negative  | positive      |
| P149       | 13.5                 | positive       | positive       | positive   | negative   | positive  | positive  | positive      |
| P150       | 0.0                  | negative       | negative       | negative   | negative   | negative  | negative  | negative      |
| P150       | 0.8                  | negative       | negative       | negative   | negative   | negative  | negative  | negative      |
| P150       | 3.6                  | negative       | negative       | negative   | negative   | negative  | negative  | negative      |
| P150       | 7.8                  | negative       | negative       | negative   | negative   | negative  | negative  | negative      |
| P150       | 10.6                 | negative       | negative       | negative   | negative   | negative  | negative  | negative      |
| P150       | 14.6                 | negative       | negative       | negative   | negative   | negative  | negative  | negative      |
| P151       | 0.0                  | positive       | positive       | positive   | negative   | positive  | positive  | positive      |
| P151       | 0.9                  | negative       | negative       | negative   | negative   | negative  | negative  | negative      |
| P151       | 4.1                  | negative       | negative       | negative   | negative   | negative  | negative  | negative      |
| P151       | 10.2                 | negative       | negative       | negative   | negative   | negative  | negative  | negative      |
| P152       | 0.0                  | positive       | positive       | positive   | negative   | positive  | positive  | positive      |
| P152       | 0.7                  | negative       | negative       | negative   | negative   | negative  | negative  | negative      |
| P152       | 4.0                  | negative       | negative       | negative   | negative   | negative  | negative  | negative      |
| P153       | 0.0                  | negative       | negative       | negative   | negative   | negative  | positive  | positive      |
| P153       | 0.7                  | negative       | negative       | negative   | negative   | negative  | negative  | negative      |
| P153       | 10.4                 | negative       | negative       | negative   | negative   | negative  | negative  | negative      |
| P153       | 15.7                 | negative       | negative       | negative   | negative   | negative  | negative  | negative      |
| P154       | 0.0                  | negative       | negative       | negative   | negative   | negative  | negative  | negative      |
| P154       | 0.7                  | negative       | negative       | negative   | negative   | negative  | negative  | negative      |
| P154       | 3.9                  | negative       | negative       | negative   | negative   | negative  | negative  | negative      |
| P154       | 10.5                 | negative       | negative       | negative   | negative   | negative  | negative  | negative      |
| P154       | 14.5                 | negative       | negative       | negative   | negative   | negative  | negative  | negative      |
| P154       | 17.7                 | negative       | negative       | negative   | negative   | negative  | negative  | negative      |
| P155       | 0.0                  | negative       | positive       | positive   | positive   | negative  | negative  | positive      |
| P155       | 0.9                  | negative       | negative       | negative   | negative   | positive  | negative  | positive      |
| P155       | 4.2                  | positive       | positive       | positive   | positive   | negative  | negative  | positive      |
| P155       | 7.9                  | positive       | positive       | positive   | positive   | negative  | positive  | positive      |
| P156       | 0.0                  | positive       | positive       | positive   | positive   | positive  | positive  | positive      |
| P156       | 1.3                  | negative       | negative       | negative   | negative   | negative  | negative  | negative      |
| P156       | 10.7                 | negative       | negative       | negative   | negative   | negative  | negative  | negative      |
| P156       | 15.5                 | negative       | negative       | negative   | negative   | negative  | negative  | negative      |
| P157       | 0.0                  | negative       | negative       | negative   | negative   | negative  | positive  | positive      |
| P157       | 0.7                  | negative       | negative       | negative   | negative   | negative  | negative  | negative      |
| P157       | 8.4                  | negative       | negative       | negative   | negative   | negative  | negative  | negative      |

**eTable 3.** Circulating Tumor DNA Results for All 1228 Plasma Samples

| Patient ID | Months after surgery | Septin9_1 Call | Septin9_2 Call | BCAT1 Call | IKZF1 Call | BCAN Call | VAV3 Call | ColonAiQ Call |
|------------|----------------------|----------------|----------------|------------|------------|-----------|-----------|---------------|
| P157       | 15.1                 | negative       | negative       | negative   | negative   | negative  | negative  | negative      |
| P158       | 0.0                  | positive       | positive       | positive   | positive   | positive  | negative  | positive      |
| P158       | 1.2                  | negative       | negative       | negative   | negative   | negative  | negative  | negative      |
| P158       | 8.2                  | negative       | negative       | negative   | negative   | negative  | negative  | negative      |
| P158       | 15.3                 | negative       | negative       | negative   | negative   | negative  | negative  | negative      |
| P159       | 0.0                  | positive       | negative       | positive   | negative   | negative  | negative  | positive      |
| P159       | 0.7                  | negative       | negative       | negative   | negative   | negative  | negative  | negative      |
| P159       | 8.6                  | negative       | negative       | positive   | negative   | negative  | negative  | positive      |
| P160       | 0.0                  | positive       | negative       | negative   | positive   | negative  | negative  | positive      |
| P160       | 0.7                  | negative       | negative       | negative   | negative   | negative  | negative  | negative      |
| P160       | 6.0                  | negative       | negative       | negative   | negative   | negative  | negative  | negative      |
| P160       | 10.8                 | negative       | negative       | negative   | negative   | negative  | negative  | negative      |
| P160       | 14.0                 | negative       | negative       | negative   | positive   | negative  | negative  | positive      |
| P161       | 0.0                  | negative       | negative       | negative   | negative   | negative  | negative  | negative      |
| P161       | 0.9                  | negative       | negative       | negative   | negative   | negative  | negative  | negative      |
| P162       | 0.0                  | positive       | positive       | positive   | positive   | positive  | positive  | positive      |
| P162       | 0.9                  | negative       | negative       | negative   | negative   | negative  | negative  | negative      |
| P163       | 0.0                  | negative       | negative       | negative   | negative   | negative  | negative  | negative      |
| P163       | 0.9                  | negative       | negative       | negative   | negative   | negative  | negative  | negative      |
| P164       | 0.0                  | negative       | negative       | negative   | negative   | negative  | negative  | negative      |
| P164       | 3.7                  | negative       | negative       | negative   | negative   | negative  | negative  | negative      |
| P165       | 0.0                  | negative       | negative       | negative   | negative   | negative  | negative  | negative      |
| P165       | 0.7                  | negative       | negative       | positive   | negative   | negative  | negative  | positive      |
| P165       | 3.6                  | negative       | negative       | negative   | negative   | negative  | negative  | negative      |
| P165       | 7.9                  | negative       | negative       | negative   | negative   | negative  | negative  | negative      |
| P165       | 10.6                 | negative       | negative       | negative   | negative   | negative  | negative  | negative      |
| P165       | 13.7                 | negative       | negative       | negative   | negative   | negative  | negative  | negative      |
| P165       | 17.7                 | negative       | negative       | negative   | negative   | negative  | negative  | negative      |
| P166       | 0.0                  | negative       | negative       | positive   | negative   | positive  | positive  | positive      |
| P166       | 3.7                  | negative       | negative       | negative   | negative   | negative  | negative  | negative      |
| P166       | 6.8                  | negative       | negative       | negative   | negative   | negative  | negative  | negative      |
| P166       | 10.2                 | negative       | negative       | negative   | negative   | negative  | negative  | negative      |
| P166       | 14.0                 | negative       | negative       | negative   | negative   | negative  | negative  | negative      |
| P166       | 17.9                 | negative       | negative       | negative   | negative   | negative  | negative  | negative      |
| P167       | 0.0                  | negative       | negative       | negative   | negative   | negative  | negative  | negative      |
| P167       | 3.4                  | negative       | negative       | negative   | negative   | negative  | negative  | negative      |
| P167       | 12.9                 | negative       | negative       | negative   | negative   | negative  | negative  | negative      |
| P168       | 0.0                  | negative       | negative       | negative   | negative   | negative  | negative  | negative      |
| P168       | 3.7                  | negative       | negative       | negative   | negative   | negative  | negative  | negative      |

**eTable 3.** Circulating Tumor DNA Results for All 1228 Plasma Samples

| Patient ID | Months after surgery | Septin9_1 Call | Septin9_2 Call | BCAT1 Call | IKZF1 Call | BCAN Call | VAV3 Call | ColonAiQ Call |
|------------|----------------------|----------------|----------------|------------|------------|-----------|-----------|---------------|
| P168       | 5.8                  | negative       | negative       | negative   | negative   | negative  | negative  | negative      |
| P168       | 11.0                 | negative       | negative       | negative   | negative   | negative  | negative  | negative      |
| P168       | 15.4                 | positive       | positive       | positive   | negative   | negative  | negative  | positive      |
| P169       | 0.0                  | positive       | positive       | positive   | positive   | positive  | positive  | positive      |
| P169       | 0.9                  | negative       | negative       | negative   | negative   | negative  | negative  | negative      |
| P170       | 0.0                  | negative       | negative       | negative   | positive   | negative  | positive  | positive      |
| P170       | 3.7                  | negative       | negative       | negative   | negative   | negative  | negative  | negative      |
| P170       | 7.7                  | negative       | negative       | negative   | negative   | negative  | negative  | negative      |
| P171       | 0.0                  | negative       | negative       | positive   | positive   | negative  | positive  | positive      |
| P171       | 0.9                  | negative       | negative       | negative   | negative   | negative  | negative  | negative      |
| P171       | 5.2                  | negative       | negative       | negative   | negative   | negative  | negative  | negative      |
| P171       | 6.9                  | negative       | negative       | negative   | negative   | negative  | negative  | negative      |
| P171       | 11.5                 | negative       | negative       | negative   | negative   | negative  | negative  | negative      |
| P171       | 17.6                 | negative       | negative       | negative   | negative   | negative  | negative  | negative      |
| P172       | 0.0                  | positive       | positive       | positive   | positive   | negative  | positive  | positive      |
| P172       | 0.7                  | negative       | negative       | negative   | negative   | negative  | negative  | negative      |
| P172       | 8.5                  | negative       | negative       | negative   | negative   | negative  | negative  | negative      |
| P172       | 13.7                 | negative       | negative       | negative   | negative   | negative  | negative  | negative      |
| P173       | 0.0                  | positive       | positive       | positive   | positive   | positive  | negative  | positive      |
| P173       | 0.6                  | negative       | negative       | negative   | negative   | negative  | negative  | negative      |
| P173       | 3.9                  | negative       | negative       | negative   | negative   | negative  | negative  | negative      |
| P173       | 7.3                  | negative       | negative       | negative   | negative   | negative  | negative  | negative      |
| P173       | 9.0                  | negative       | negative       | negative   | negative   | negative  | positive  | positive      |
| P173       | 12.1                 | negative       | negative       | negative   | negative   | negative  | negative  | negative      |
| P173       | 17.8                 | negative       | negative       | negative   | negative   | negative  | negative  | negative      |
| P174       | 0.0                  | positive       | positive       | positive   | negative   | negative  | negative  | positive      |
| P174       | 1.2                  | negative       | negative       | negative   | negative   | negative  | negative  | negative      |
| P174       | 4.0                  | negative       | negative       | negative   | negative   | negative  | negative  | negative      |
| P174       | 7.7                  | negative       | negative       | negative   | negative   | negative  | negative  | negative      |
| P175       | 0.0                  | negative       | negative       | negative   | negative   | negative  | negative  | negative      |
| P175       | 0.6                  | negative       | negative       | negative   | negative   | negative  | negative  | negative      |
| P175       | 7.1                  | negative       | negative       | negative   | negative   | negative  | negative  | negative      |
| P176       | 0.0                  | negative       | negative       | positive   | negative   | positive  | negative  | positive      |
| P176       | 0.7                  | negative       | negative       | negative   | negative   | negative  | negative  | negative      |
| P176       | 5.3                  | negative       | negative       | negative   | negative   | negative  | negative  | negative      |
| P176       | 7.9                  | negative       | negative       | negative   | negative   | negative  | negative  | negative      |
| P176       | 12.3                 | negative       | negative       | positive   | negative   | negative  | negative  | positive      |
| P177       | 0.0                  | positive       | negative       | negative   | negative   | negative  | negative  | positive      |
| P177       | 0.8                  | negative       | negative       | negative   | negative   | negative  | negative  | negative      |

**eTable 3.** Circulating Tumor DNA Results for All 1228 Plasma Samples

| Patient ID | Months after surgery | Septin9_1 Call | Septin9_2 Call | BCAT1 Call | IKZF1 Call | BCAN Call | VAV3 Call | ColonAiQ Call |
|------------|----------------------|----------------|----------------|------------|------------|-----------|-----------|---------------|
| P177       | 4.5                  | negative       | negative       | negative   | negative   | negative  | negative  | negative      |
| P177       | 9.4                  | negative       | negative       | negative   | negative   | negative  | negative  | negative      |
| P178       | 0.0                  | negative       | negative       | positive   | negative   | negative  | positive  | positive      |
| P178       | 1.6                  | negative       | negative       | negative   | negative   | negative  | negative  | negative      |
| P178       | 7.8                  | negative       | negative       | negative   | negative   | negative  | negative  | negative      |
| P178       | 10.3                 | positive       | negative       | negative   | negative   | negative  | negative  | positive      |
| P178       | 13.3                 | negative       | negative       | negative   | negative   | negative  | negative  | negative      |
| P178       | 17.7                 | positive       | negative       | negative   | negative   | negative  | negative  | positive      |
| P179       | 0.0                  | negative       | negative       | negative   | positive   | negative  | negative  | positive      |
| P179       | 3.4                  | negative       | positive       | negative   | negative   | negative  | negative  | positive      |
| P180       | 0.7                  | negative       | negative       | negative   | negative   | negative  | negative  | negative      |
| P180       | 4.0                  | negative       | negative       | negative   | negative   | negative  | negative  | negative      |
| P180       | 8.1                  | negative       | negative       | negative   | negative   | negative  | negative  | negative      |
| P181       | 0.0                  | positive       | positive       | negative   | negative   | negative  | negative  | positive      |
| P181       | 0.7                  | negative       | negative       | negative   | negative   | negative  | negative  | negative      |
| P181       | 3.0                  | negative       | negative       | negative   | negative   | negative  | negative  | negative      |
| P181       | 6.7                  | negative       | negative       | negative   | negative   | negative  | negative  | negative      |
| P181       | 11.4                 | negative       | negative       | negative   | negative   | negative  | negative  | negative      |
| P181       | 15.8                 | negative       | negative       | negative   | negative   | negative  | negative  | negative      |
| P182       | 0.0                  | positive       | negative       | negative   | negative   | negative  | negative  | positive      |
| P182       | 0.9                  | negative       | negative       | negative   | negative   | negative  | negative  | negative      |
| P182       | 4.8                  | negative       | negative       | negative   | negative   | negative  | negative  | negative      |
| P182       | 8.4                  | negative       | negative       | negative   | negative   | negative  | negative  | negative      |
| P182       | 10.9                 | negative       | negative       | negative   | negative   | negative  | negative  | negative      |
| P182       | 13.8                 | negative       | negative       | negative   | negative   | negative  | negative  | negative      |
| P182       | 16.7                 | negative       | negative       | negative   | negative   | negative  | negative  | negative      |
| P183       | 0.0                  | negative       | positive       | negative   | negative   | negative  | negative  | positive      |
| P183       | 0.6                  | negative       | negative       | negative   | negative   | negative  | negative  | negative      |
| P184       | 0.0                  | negative       | positive       | negative   | positive   | negative  | positive  | positive      |
| P184       | 0.8                  | negative       | negative       | negative   | negative   | negative  | negative  | negative      |
| P184       | 3.8                  | negative       | negative       | negative   | negative   | negative  | negative  | negative      |
| P184       | 7.8                  | negative       | negative       | negative   | negative   | negative  | negative  | negative      |
| P184       | 11.5                 | negative       | negative       | negative   | negative   | negative  | negative  | negative      |
| P184       | 16.7                 | negative       | negative       | negative   | negative   | negative  | negative  | negative      |
| P185       | 0.0                  | positive       | positive       | positive   | positive   | positive  | positive  | positive      |
| P185       | 0.9                  | positive       | positive       | negative   | positive   | positive  | positive  | positive      |
| P185       | 3.8                  | positive       | negative       | negative   | positive   | negative  | positive  | positive      |
| P185       | 8.8                  | positive       | positive       | positive   | positive   | positive  | positive  | positive      |
| P186       | 0.0                  | positive       | positive       | positive   | positive   | positive  | negative  | positive      |

**eTable 3.** Circulating Tumor DNA Results for All 1228 Plasma Samples

| Patient ID | Months after surgery | Septin9_1 Call | Septin9_2 Call | BCAT1 Call | IKZF1 Call | BCAN Call | VAV3 Call | ColonAiQ Call |
|------------|----------------------|----------------|----------------|------------|------------|-----------|-----------|---------------|
| P186       | 0.9                  | negative       | negative       | negative   | negative   | negative  | negative  | negative      |
| P186       | 3.5                  | negative       | negative       | negative   | negative   | negative  | negative  | negative      |
| P186       | 7.5                  | negative       | negative       | negative   | negative   | negative  | negative  | negative      |
| P186       | 10.0                 | negative       | negative       | negative   | negative   | negative  | negative  | negative      |
| P187       | 0.0                  | negative       | negative       | positive   | negative   | negative  | negative  | positive      |
| P187       | 0.6                  | negative       | negative       | negative   | negative   | negative  | negative  | negative      |
| P187       | 3.8                  | negative       | negative       | negative   | negative   | negative  | negative  | negative      |
| P187       | 6.9                  | negative       | negative       | negative   | negative   | negative  | negative  | negative      |
| P187       | 9.7                  | negative       | negative       | negative   | negative   | negative  | negative  | negative      |
| P187       | 13.4                 | negative       | negative       | negative   | negative   | negative  | negative  | negative      |
| P188       | 0.0                  | negative       | negative       | positive   | positive   | negative  | negative  | positive      |
| P188       | 0.8                  | positive       | positive       | negative   | negative   | negative  | negative  | positive      |
| P188       | 3.8                  | negative       | negative       | negative   | negative   | negative  | negative  | negative      |
| P189       | 0.0                  | positive       | negative       | negative   | negative   | negative  | negative  | positive      |
| P189       | 0.9                  | negative       | negative       | negative   | negative   | negative  | negative  | negative      |
| P190       | 0.0                  | positive       | negative       | negative   | negative   | negative  | negative  | positive      |
| P190       | 0.9                  | negative       | negative       | negative   | negative   | negative  | negative  | negative      |
| P191       | 0.0                  | negative       | negative       | negative   | negative   | negative  | negative  | negative      |
| P191       | 0.9                  | negative       | negative       | negative   | negative   | negative  | negative  | negative      |
| P191       | 7.8                  | negative       | negative       | negative   | negative   | negative  | negative  | negative      |
| P191       | 14.5                 | negative       | negative       | negative   | negative   | negative  | negative  | negative      |
| P192       | 0.0                  | positive       | positive       | positive   | positive   | positive  | positive  | positive      |
| P192       | 0.8                  | positive       | negative       | negative   | negative   | negative  | negative  | positive      |
| P192       | 3.8                  | negative       | negative       | negative   | negative   | negative  | negative  | negative      |
| P192       | 7.1                  | negative       | negative       | negative   | negative   | negative  | negative  | negative      |
| P192       | 10.1                 | negative       | negative       | negative   | negative   | negative  | negative  | negative      |
| P192       | 13.2                 | negative       | negative       | negative   | negative   | negative  | negative  | negative      |
| P193       | 0.0                  | negative       | positive       | negative   | negative   | negative  | negative  | positive      |
| P193       | 0.8                  | negative       | negative       | negative   | negative   | negative  | negative  | negative      |
| P194       | 0.0                  | positive       | negative       | negative   | negative   | negative  | negative  | positive      |
| P194       | 0.7                  | negative       | negative       | negative   | negative   | negative  | negative  | negative      |
| P195       | 0.0                  | negative       | negative       | negative   | negative   | negative  | negative  | negative      |
| P195       | 0.8                  | negative       | negative       | negative   | negative   | negative  | negative  | negative      |
| P195       | 3.6                  | negative       | negative       | negative   | negative   | negative  | negative  | negative      |
| P195       | 6.2                  | negative       | negative       | negative   | negative   | negative  | negative  | negative      |
| P195       | 10.0                 | negative       | negative       | negative   | negative   | negative  | negative  | negative      |
| P195       | 12.9                 | negative       | negative       | negative   | negative   | negative  | negative  | negative      |
| P195       | 16.0                 | negative       | negative       | negative   | negative   | negative  | negative  | negative      |
| P196       | 0.0                  | negative       | negative       | negative   | negative   | positive  | positive  | positive      |



**eTable 3.** Circulating Tumor DNA Results for All 1228 Plasma Samples

| Patient ID | Months after surgery | Septin9_1 Call | Septin9_2 Call | BCAT1 Call | IKZF1 Call | BCAN Call | VAV3 Call | ColonAiQ Call |
|------------|----------------------|----------------|----------------|------------|------------|-----------|-----------|---------------|
| P196       | 0.7                  | negative       | negative       | negative   | negative   | negative  | negative  | negative      |
| P196       | 13.7                 | negative       | negative       | negative   | negative   | negative  | negative  | negative      |
| P197       | 0.0                  | positive       | positive       | negative   | negative   | negative  | negative  | positive      |
| P197       | 0.6                  | negative       | negative       | negative   | negative   | negative  | negative  | negative      |
| P197       | 3.9                  | negative       | negative       | negative   | negative   | negative  | negative  | negative      |
| P197       | 12.4                 | negative       | negative       | positive   | negative   | negative  | negative  | positive      |
| P197       | 16.5                 | negative       | negative       | negative   | negative   | negative  | negative  | negative      |
| P198       | 0.0                  | positive       | positive       | positive   | positive   | positive  | positive  | positive      |
| P198       | 0.7                  | negative       | negative       | negative   | negative   | negative  | negative  | negative      |
| P198       | 7.0                  | negative       | negative       | negative   | negative   | negative  | negative  | negative      |
| P198       | 13.6                 | negative       | negative       | negative   | negative   | negative  | negative  | negative      |
| P199       | 0.0                  | negative       | negative       | negative   | negative   | negative  | negative  | negative      |
| P199       | 0.6                  | negative       | negative       | negative   | negative   | negative  | negative  | negative      |
| P200       | 0.0                  | negative       | positive       | positive   | negative   | negative  | negative  | positive      |
| P200       | 0.6                  | positive       | negative       | negative   | positive   | negative  | negative  | positive      |
| P200       | 6.9                  | negative       | negative       | positive   | negative   | negative  | negative  | positive      |
| P200       | 8.6                  | positive       | positive       | positive   | positive   | positive  | negative  | positive      |
| P200       | 11.3                 | positive       | positive       | positive   | positive   | positive  | negative  | positive      |
| P201       | 0.0                  | negative       | negative       | negative   | negative   | negative  | positive  | positive      |
| P201       | 0.9                  | negative       | negative       | negative   | negative   | negative  | negative  | negative      |
| P202       | 0.0                  | negative       | negative       | positive   | negative   | negative  | negative  | positive      |
| P202       | 0.7                  | negative       | negative       | negative   | negative   | negative  | negative  | negative      |
| P202       | 4.3                  | negative       | negative       | negative   | negative   | negative  | negative  | negative      |
| P202       | 8.4                  | negative       | negative       | negative   | negative   | negative  | negative  | negative      |
| P202       | 13.8                 | negative       | negative       | positive   | negative   | negative  | negative  | positive      |
| P202       | 16.6                 | negative       | negative       | positive   | positive   | negative  | negative  | positive      |
| P203       | 0.0                  | negative       | positive       | negative   | negative   | negative  | negative  | positive      |
| P203       | 1.1                  | negative       | negative       | negative   | negative   | negative  | negative  | negative      |
| P203       | 7.5                  | negative       | negative       | negative   | negative   | negative  | negative  | negative      |
| P203       | 10.3                 | negative       | negative       | negative   | negative   | negative  | negative  | negative      |
| P203       | 13.7                 | negative       | positive       | negative   | positive   | positive  | negative  | positive      |
| P203       | 16.5                 | negative       | negative       | negative   | negative   | negative  | negative  | negative      |
| P204       | 0.0                  | negative       | negative       | negative   | negative   | negative  | negative  | negative      |
| P204       | 0.8                  | negative       | negative       | negative   | negative   | negative  | negative  | negative      |
| P204       | 4.1                  | negative       | negative       | negative   | negative   | negative  | negative  | negative      |
| P204       | 8.3                  | negative       | negative       | negative   | negative   | negative  | negative  | negative      |
| P204       | 10.2                 | negative       | negative       | negative   | negative   | negative  | negative  | negative      |
| P205       | 0.0                  | negative       | positive       | positive   | positive   | negative  | positive  | positive      |
| P205       | 0.7                  | negative       | negative       | negative   | negative   | negative  | negative  | negative      |

**eTable 3.** Circulating Tumor DNA Results for All 1228 Plasma Samples

| Patient ID | Months after surgery | Septin9_1 Call | Septin9_2 Call | BCAT1 Call | IKZF1 Call | BCAN Call | VAV3 Call | ColonAiQ Call |
|------------|----------------------|----------------|----------------|------------|------------|-----------|-----------|---------------|
| P206       | 0.0                  | negative       | negative       | negative   | positive   | negative  | negative  | positive      |
| P206       | 0.6                  | negative       | negative       | positive   | negative   | negative  | negative  | positive      |
| P206       | 3.7                  | negative       | negative       | negative   | negative   | negative  | negative  | negative      |
| P206       | 6.7                  | negative       | negative       | negative   | negative   | negative  | negative  | negative      |
| P206       | 9.7                  | negative       | negative       | negative   | negative   | negative  | negative  | negative      |
| P206       | 13.0                 | negative       | negative       | negative   | negative   | negative  | negative  | negative      |
| P207       | 0.0                  | negative       | negative       | negative   | positive   | negative  | positive  | positive      |
| P207       | 1.1                  | negative       | negative       | negative   | negative   | negative  | negative  | negative      |
| P207       | 7.3                  | negative       | negative       | negative   | negative   | negative  | negative  | negative      |
| P207       | 10.7                 | negative       | negative       | negative   | negative   | negative  | negative  | negative      |
| P207       | 13.6                 | negative       | negative       | negative   | negative   | negative  | negative  | negative      |
| P207       | 16.5                 | negative       | negative       | negative   | negative   | negative  | negative  | negative      |
| P208       | 0.0                  | positive       | positive       | negative   | negative   | negative  | negative  | positive      |
| P208       | 0.7                  | negative       | negative       | negative   | negative   | negative  | negative  | negative      |
| P208       | 6.1                  | negative       | negative       | negative   | negative   | negative  | negative  | negative      |
| P208       | 9.8                  | negative       | negative       | negative   | negative   | negative  | negative  | negative      |
| P208       | 12.8                 | negative       | negative       | negative   | negative   | negative  | negative  | negative      |
| P209       | 0.0                  | negative       | negative       | negative   | negative   | negative  | negative  | negative      |
| P209       | 0.7                  | negative       | negative       | negative   | negative   | negative  | negative  | negative      |
| P210       | 0.0                  | positive       | negative       | positive   | negative   | negative  | negative  | positive      |
| P210       | 0.6                  | negative       | negative       | negative   | negative   | negative  | negative  | negative      |
| P210       | 7.7                  | negative       | negative       | negative   | negative   | negative  | negative  | negative      |
| P210       | 11.4                 | negative       | negative       | negative   | negative   | negative  | negative  | negative      |
| P210       | 14.5                 | negative       | negative       | negative   | negative   | negative  | negative  | negative      |
| P211       | 0.0                  | negative       | negative       | negative   | negative   | negative  | negative  | negative      |
| P211       | 1.0                  | negative       | negative       | negative   | negative   | negative  | negative  | negative      |
| P211       | 7.8                  | negative       | negative       | negative   | negative   | negative  | negative  | negative      |
| P211       | 10.3                 | negative       | negative       | negative   | negative   | negative  | negative  | negative      |
| P211       | 14.7                 | negative       | negative       | negative   | negative   | negative  | negative  | negative      |
| P212       | 0.0                  | positive       | negative       | negative   | negative   | negative  | negative  | positive      |
| P212       | 1.0                  | negative       | negative       | negative   | negative   | negative  | negative  | negative      |
| P212       | 7.6                  | negative       | negative       | negative   | negative   | negative  | negative  | negative      |
| P212       | 10.4                 | negative       | negative       | positive   | negative   | positive  | negative  | positive      |
| P212       | 13.9                 | negative       | negative       | negative   | negative   | negative  | negative  | negative      |
| P213       | 0.0                  | negative       | negative       | negative   | negative   | negative  | positive  | positive      |
| P213       | 1.1                  | negative       | negative       | negative   | negative   | negative  | negative  | negative      |
| P213       | 7.0                  | negative       | negative       | negative   | negative   | negative  | negative  | negative      |
| P213       | 9.8                  | negative       | negative       | negative   | negative   | negative  | negative  | negative      |
| P213       | 13.7                 | negative       | negative       | negative   | negative   | negative  | negative  | negative      |

**eTable 3.** Circulating Tumor DNA Results for All 1228 Plasma Samples

| Patient ID | Months after surgery | Septin9_1 Call | Septin9_2 Call | BCAT1 Call | IKZF1 Call | BCAN Call | VAV3 Call | ColonAiQ Call |
|------------|----------------------|----------------|----------------|------------|------------|-----------|-----------|---------------|
| P213       | 16.1                 | negative       | negative       | negative   | negative   | positive  | negative  | positive      |
| P214       | 0.0                  | negative       | negative       | negative   | negative   | negative  | negative  | negative      |
| P214       | 0.9                  | negative       | negative       | negative   | negative   | negative  | negative  | negative      |
| P214       | 3.8                  | negative       | negative       | negative   | negative   | negative  | negative  | negative      |
| P214       | 7.0                  | negative       | negative       | negative   | negative   | negative  | negative  | negative      |
| P215       | 0.0                  | negative       | negative       | positive   | negative   | negative  | negative  | positive      |
| P215       | 1.1                  | positive       | negative       | negative   | negative   | negative  | negative  | positive      |
| P215       | 9.3                  | negative       | negative       | negative   | negative   | negative  | negative  | negative      |
| P216       | 0.0                  | negative       | positive       | negative   | negative   | negative  | negative  | positive      |
| P216       | 0.8                  | negative       | negative       | negative   | negative   | negative  | negative  | negative      |
| P216       | 5.7                  | negative       | negative       | negative   | negative   | negative  | negative  | negative      |
| P216       | 12.8                 | negative       | negative       | negative   | negative   | negative  | negative  | negative      |
| P217       | 0.0                  | positive       | negative       | negative   | negative   | negative  | negative  | positive      |
| P217       | 1.0                  | negative       | negative       | negative   | negative   | negative  | negative  | negative      |
| P217       | 5.9                  | negative       | negative       | negative   | negative   | negative  | negative  | negative      |
| P218       | 0.0                  | negative       | negative       | negative   | positive   | negative  | negative  | positive      |
| P218       | 0.9                  | negative       | negative       | negative   | negative   | negative  | negative  | negative      |
| P218       | 6.5                  | negative       | negative       | negative   | negative   | negative  | negative  | negative      |
| P218       | 12.1                 | negative       | negative       | negative   | negative   | negative  | negative  | negative      |
| P219       | 0.0                  | negative       | negative       | negative   | negative   | negative  | negative  | negative      |
| P219       | 0.9                  | negative       | negative       | negative   | negative   | negative  | negative  | negative      |
| P219       | 3.0                  | negative       | positive       | negative   | negative   | negative  | negative  | positive      |
| P220       | 0.0                  | negative       | negative       | negative   | negative   | negative  | positive  | positive      |
| P220       | 1.0                  | negative       | negative       | negative   | negative   | negative  | negative  | negative      |
| P220       | 8.3                  | negative       | negative       | negative   | negative   | negative  | negative  | negative      |
| P220       | 15.9                 | negative       | negative       | negative   | negative   | negative  | negative  | negative      |
| P221       | 0.0                  | positive       | negative       | negative   | negative   | negative  | negative  | positive      |
| P221       | 1.0                  | negative       | negative       | negative   | negative   | negative  | negative  | negative      |
| P221       | 6.0                  | negative       | negative       | negative   | negative   | negative  | negative  | negative      |
| P221       | 9.5                  | negative       | negative       | negative   | negative   | negative  | negative  | negative      |
| P221       | 13.1                 | negative       | negative       | positive   | negative   | negative  | negative  | positive      |
| P222       | 0.0                  | negative       | negative       | negative   | negative   | negative  | positive  | positive      |
| P222       | 8.4                  | negative       | negative       | negative   | negative   | negative  | negative  | negative      |
| P222       | 11.5                 | positive       | positive       | positive   | positive   | negative  | positive  | positive      |
| P222       | 16.2                 | negative       | negative       | negative   | negative   | negative  | negative  | negative      |
| P223       | 0.0                  | positive       | positive       | positive   | positive   | positive  | positive  | positive      |
| P223       | 8.0                  | negative       | negative       | negative   | negative   | negative  | negative  | negative      |
| P223       | 18.0                 | negative       | negative       | negative   | negative   | negative  | negative  | negative      |
| P224       | 0.0                  | positive       | positive       | positive   | negative   | positive  | negative  | positive      |

**eTable 3.** Circulating Tumor DNA Results for All 1228 Plasma Samples

| Patient ID | Months after surgery | Septin9_1 Call | Septin9_2 Call | BCAT1 Call | IKZF1 Call | BCAN Call | VAV3 Call | ColonAiQ Call |
|------------|----------------------|----------------|----------------|------------|------------|-----------|-----------|---------------|
| P224       | 1.0                  | negative       | negative       | negative   | negative   | negative  | negative  | negative      |
| P224       | 4.4                  | negative       | negative       | negative   | negative   | negative  | negative  | negative      |
| P224       | 8.3                  | negative       | negative       | negative   | negative   | negative  | negative  | negative      |
| P224       | 11.7                 | negative       | negative       | negative   | negative   | negative  | negative  | negative      |
| P225       | 0.0                  | negative       | negative       | negative   | negative   | negative  | negative  | negative      |
| P225       | 8.1                  | negative       | negative       | negative   | negative   | negative  | negative  | negative      |
| P226       | 0.0                  | positive       | negative       | negative   | negative   | negative  | negative  | positive      |
| P226       | 0.7                  | negative       | negative       | negative   | negative   | negative  | negative  | negative      |
| P227       | 0.0                  | positive       | negative       | negative   | negative   | negative  | negative  | positive      |
| P227       | 0.8                  | positive       | negative       | negative   | negative   | negative  | negative  | positive      |
| P227       | 3.9                  | negative       | negative       | negative   | negative   | negative  | negative  | negative      |
| P227       | 8.1                  | negative       | negative       | negative   | negative   | negative  | negative  | negative      |
| P227       | 11.8                 | negative       | negative       | negative   | negative   | negative  | negative  | negative      |
| P228       | 0.0                  | negative       | negative       | negative   | positive   | negative  | negative  | positive      |
| P228       | 0.7                  | negative       | negative       | negative   | negative   | negative  | negative  | negative      |
| P229       | 0.0                  | negative       | negative       | negative   | positive   | negative  | negative  | positive      |
| P229       | 0.7                  | negative       | negative       | negative   | negative   | negative  | positive  | positive      |
| P229       | 4.8                  | negative       | negative       | negative   | negative   | negative  | negative  | negative      |
| P229       | 6.3                  | negative       | negative       | negative   | negative   | negative  | negative  | negative      |
| P229       | 9.1                  | negative       | negative       | negative   | negative   | negative  | negative  | negative      |
| P229       | 12.6                 | negative       | negative       | negative   | negative   | negative  | negative  | negative      |
| P230       | 0.0                  | positive       | positive       | positive   | positive   | positive  | positive  | positive      |
| P230       | 6.3                  | negative       | negative       | negative   | negative   | negative  | negative  | negative      |
| P231       | 0.0                  | negative       | negative       | positive   | negative   | negative  | negative  | positive      |
| P231       | 5.0                  | negative       | negative       | negative   | negative   | negative  | negative  | negative      |
| P231       | 7.8                  | negative       | negative       | negative   | positive   | negative  | negative  | positive      |
| P232       | 0.0                  | negative       | negative       | negative   | negative   | positive  | negative  | positive      |
| P232       | 0.7                  | negative       | negative       | negative   | negative   | negative  | negative  | negative      |
| P232       | 4.4                  | negative       | negative       | negative   | negative   | negative  | negative  | negative      |
| P232       | 6.8                  | negative       | negative       | negative   | negative   | negative  | negative  | negative      |
| P232       | 11.2                 | negative       | negative       | negative   | negative   | negative  | negative  | negative      |
| P232       | 14.5                 | negative       | negative       | negative   | negative   | negative  | negative  | negative      |
| P233       | 0.0                  | negative       | negative       | negative   | negative   | negative  | positive  | positive      |
| P233       | 0.8                  | negative       | negative       | negative   | negative   | negative  | negative  | negative      |
| P233       | 4.3                  | negative       | negative       | negative   | negative   | negative  | negative  | negative      |
| P233       | 6.6                  | negative       | negative       | negative   | negative   | negative  | negative  | negative      |
| P233       | 9.9                  | negative       | negative       | negative   | negative   | negative  | negative  | negative      |
| P234       | 0.0                  | negative       | negative       | negative   | negative   | negative  | positive  | positive      |
| P234       | 0.9                  | negative       | negative       | negative   | negative   | negative  | negative  | negative      |

**eTable 3.** Circulating Tumor DNA Results for All 1228 Plasma Samples

| Patient ID | Months after surgery | Septin9_1 Call | Septin9_2 Call | BCAT1 Call | IKZF1 Call | BCAN Call | VAV3 Call | ColonAiQ Call |
|------------|----------------------|----------------|----------------|------------|------------|-----------|-----------|---------------|
| P234       | 3.4                  | negative       | negative       | negative   | negative   | negative  | negative  | negative      |
| P234       | 7.8                  | negative       | negative       | negative   | negative   | negative  | negative  | negative      |
| P234       | 12.7                 | negative       | negative       | negative   | negative   | negative  | negative  | negative      |
| P235       | 0.0                  | negative       | negative       | negative   | negative   | negative  | negative  | negative      |
| P235       | 0.7                  | negative       | negative       | negative   | negative   | negative  | negative  | negative      |
| P235       | 4.7                  | negative       | negative       | negative   | negative   | negative  | negative  | negative      |
| P235       | 6.8                  | negative       | negative       | negative   | negative   | negative  | negative  | negative      |
| P235       | 9.8                  | negative       | negative       | negative   | negative   | negative  | negative  | negative      |
| P235       | 14.4                 | negative       | negative       | negative   | negative   | negative  | negative  | negative      |
| P236       | 0.0                  | negative       | negative       | negative   | negative   | negative  | negative  | negative      |
| P236       | 0.7                  | negative       | negative       | negative   | negative   | negative  | negative  | negative      |
| P236       | 4.7                  | negative       | negative       | negative   | negative   | negative  | negative  | negative      |
| P236       | 9.6                  | negative       | positive       | negative   | negative   | negative  | negative  | positive      |
| P236       | 14.4                 | positive       | positive       | negative   | negative   | negative  | negative  | positive      |
| P237       | 0.0                  | negative       | negative       | negative   | negative   | negative  | negative  | negative      |
| P237       | 0.7                  | negative       | negative       | negative   | negative   | negative  | negative  | negative      |
| P237       | 5.2                  | negative       | negative       | negative   | negative   | negative  | negative  | negative      |
| P238       | 0.0                  | positive       | negative       | negative   | negative   | negative  | negative  | positive      |
| P238       | 0.6                  | negative       | negative       | negative   | negative   | negative  | negative  | negative      |
| P238       | 4.1                  | negative       | negative       | negative   | negative   | negative  | negative  | negative      |
| P238       | 6.4                  | negative       | positive       | negative   | negative   | negative  | negative  | positive      |
| P239       | 0.0                  | positive       | negative       | negative   | positive   | negative  | positive  | positive      |
| P239       | 0.9                  | negative       | negative       | negative   | negative   | negative  | negative  | negative      |
| P239       | 4.2                  | negative       | negative       | negative   | negative   | negative  | negative  | negative      |
| P239       | 11.5                 | negative       | negative       | negative   | negative   | negative  | negative  | negative      |
| P240       | 0.0                  | negative       | negative       | negative   | positive   | negative  | positive  | positive      |
| P240       | 0.8                  | negative       | negative       | negative   | negative   | negative  | negative  | negative      |
| P240       | 4.0                  | negative       | negative       | negative   | positive   | negative  | negative  | positive      |
| P240       | 6.6                  | negative       | negative       | negative   | negative   | negative  | negative  | negative      |
| P240       | 11.6                 | negative       | negative       | positive   | negative   | negative  | negative  | positive      |
| P241       | 0.0                  | positive       | positive       | negative   | negative   | negative  | negative  | positive      |
| P241       | 1.0                  | negative       | negative       | negative   | negative   | negative  | negative  | negative      |
| P241       | 3.8                  | positive       | negative       | negative   | negative   | negative  | negative  | positive      |
| P241       | 5.9                  | negative       | negative       | negative   | negative   | negative  | negative  | negative      |
| P241       | 9.1                  | negative       | negative       | negative   | negative   | negative  | negative  | negative      |
| P241       | 12.8                 | negative       | negative       | negative   | negative   | negative  | negative  | negative      |
| P242       | 0.0                  | positive       | negative       | negative   | negative   | negative  | negative  | positive      |
| P242       | 0.7                  | negative       | negative       | negative   | negative   | negative  | negative  | negative      |
| P242       | 3.5                  | negative       | negative       | negative   | positive   | negative  | negative  | positive      |

**eTable 3.** Circulating Tumor DNA Results for All 1228 Plasma Samples

| Patient ID | Months after surgery | Septin9_1 Call | Septin9_2 Call | BCAT1 Call | IKZF1 Call | BCAN Call | VAV3 Call | ColonAiQ Call |
|------------|----------------------|----------------|----------------|------------|------------|-----------|-----------|---------------|
| P242       | 6.8                  | negative       | negative       | negative   | negative   | negative  | negative  | negative      |
| P242       | 10.8                 | negative       | negative       | negative   | negative   | negative  | negative  | negative      |
| P243       | 0.0                  | negative       | negative       | negative   | negative   | negative  | negative  | negative      |
| P243       | 0.8                  | negative       | negative       | negative   | negative   | negative  | negative  | negative      |
| P243       | 3.8                  | negative       | negative       | negative   | negative   | negative  | negative  | negative      |
| P243       | 6.2                  | positive       | negative       | negative   | negative   | negative  | negative  | positive      |
| P244       | 0.0                  | positive       | negative       | negative   | negative   | negative  | negative  | positive      |
| P244       | 0.7                  | negative       | negative       | negative   | negative   | negative  | negative  | negative      |
| P244       | 8.4                  | negative       | negative       | negative   | negative   | negative  | negative  | negative      |
| P245       | 0.0                  | negative       | negative       | negative   | negative   | negative  | positive  | positive      |
| P245       | 0.8                  | negative       | negative       | negative   | negative   | negative  | negative  | negative      |
| P245       | 6.4                  | negative       | negative       | negative   | negative   | negative  | negative  | negative      |
| P245       | 9.4                  | negative       | negative       | negative   | negative   | negative  | negative  | negative      |
| P246       | 0.0                  | positive       | negative       | negative   | negative   | negative  | negative  | positive      |
| P246       | 0.7                  | negative       | negative       | negative   | negative   | negative  | negative  | negative      |
| P246       | 6.3                  | negative       | negative       | negative   | negative   | negative  | negative  | negative      |
| P247       | 0.0                  | positive       | positive       | negative   | negative   | positive  | negative  | positive      |
| P247       | 0.7                  | negative       | negative       | negative   | negative   | negative  | negative  | negative      |
| P247       | 3.7                  | negative       | negative       | negative   | negative   | negative  | negative  | negative      |
| P247       | 7.4                  | negative       | negative       | negative   | negative   | negative  | negative  | negative      |
| P247       | 12.1                 | negative       | negative       | negative   | negative   | negative  | negative  | negative      |
| P248       | 0.0                  | negative       | negative       | positive   | negative   | negative  | negative  | positive      |
| P248       | 0.8                  | negative       | negative       | negative   | positive   | negative  | negative  | positive      |
| P249       | 0.0                  | positive       | positive       | positive   | positive   | positive  | positive  | positive      |
| P249       | 0.7                  | positive       | positive       | positive   | positive   | negative  | positive  | positive      |
| P249       | 3.1                  | negative       | negative       | negative   | negative   | negative  | negative  | negative      |
| P249       | 6.1                  | negative       | negative       | negative   | negative   | negative  | negative  | negative      |
| P249       | 12.6                 | negative       | negative       | negative   | negative   | negative  | negative  | negative      |
| P250       | 0.0                  | negative       | negative       | negative   | positive   | negative  | positive  | positive      |
| P250       | 0.9                  | negative       | negative       | negative   | negative   | negative  | negative  | negative      |
| P250       | 4.5                  | negative       | negative       | negative   | negative   | negative  | negative  | negative      |
| P250       | 7.5                  | negative       | negative       | negative   | negative   | negative  | negative  | negative      |
| P250       | 11.0                 | negative       | negative       | negative   | negative   | negative  | negative  | negative      |
| P251       | 0.0                  | negative       | negative       | negative   | negative   | negative  | negative  | negative      |
| P251       | 3.2                  | negative       | negative       | negative   | negative   | negative  | negative  | negative      |
| P251       | 5.1                  | negative       | negative       | negative   | negative   | negative  | negative  | negative      |
| P251       | 8.2                  | negative       | negative       | negative   | negative   | negative  | negative  | negative      |
| P251       | 11.1                 | negative       | negative       | negative   | negative   | negative  | negative  | negative      |
| P252       | 0.0                  | positive       | positive       | positive   | positive   | positive  | negative  | positive      |

**eTable 3.** Circulating Tumor DNA Results for All 1228 Plasma Samples

| Patient ID | Months after surgery | Septin9_1 Call | Septin9_2 Call | BCAT1 Call | IKZF1 Call | BCAN Call | VAV3 Call | ColonAiQ Call |
|------------|----------------------|----------------|----------------|------------|------------|-----------|-----------|---------------|
| P252       | 0.7                  | negative       | negative       | negative   | negative   | negative  | negative  | negative      |
| P252       | 3.9                  | negative       | negative       | negative   | negative   | negative  | negative  | negative      |
| P252       | 7.1                  | negative       | negative       | negative   | negative   | negative  | negative  | negative      |
| P252       | 10.5                 | positive       | negative       | negative   | negative   | negative  | negative  | positive      |
| P253       | 0.0                  | negative       | negative       | positive   | positive   | negative  | positive  | positive      |
| P253       | 0.8                  | negative       | negative       | negative   | negative   | negative  | negative  | negative      |
| P253       | 3.6                  | negative       | negative       | negative   | negative   | negative  | negative  | negative      |
| P253       | 6.2                  | negative       | negative       | negative   | negative   | negative  | negative  | negative      |
| P253       | 9.5                  | negative       | negative       | negative   | negative   | negative  | negative  | negative      |
| P253       | 12.2                 | negative       | positive       | negative   | negative   | negative  | negative  | positive      |
| P254       | 0.0                  | negative       | negative       | negative   | negative   | negative  | negative  | negative      |
| P254       | 0.8                  | negative       | negative       | negative   | negative   | negative  | negative  | negative      |
| P254       | 4.3                  | negative       | negative       | negative   | negative   | negative  | negative  | negative      |
| P254       | 8.0                  | negative       | negative       | negative   | negative   | negative  | negative  | negative      |
| P255       | 0.0                  | negative       | negative       | negative   | negative   | negative  | negative  | negative      |
| P255       | 0.9                  | negative       | negative       | negative   | negative   | negative  | negative  | negative      |
| P255       | 3.9                  | negative       | negative       | negative   | negative   | negative  | negative  | negative      |
| P255       | 7.2                  | negative       | negative       | negative   | negative   | negative  | negative  | negative      |
| P256       | 0.0                  | positive       | positive       | positive   | negative   | negative  | positive  | positive      |
| P256       | 0.9                  | negative       | negative       | negative   | negative   | negative  | negative  | negative      |
| P256       | 3.5                  | negative       | negative       | negative   | negative   | negative  | negative  | negative      |
| P256       | 6.8                  | negative       | negative       | negative   | negative   | negative  | negative  | negative      |
| P256       | 10.3                 | negative       | negative       | negative   | negative   | negative  | negative  | negative      |
| P256       | 13.3                 | negative       | negative       | negative   | negative   | negative  | negative  | negative      |
| P257       | 0.0                  | positive       | negative       | positive   | positive   | negative  | positive  | positive      |
| P257       | 0.7                  | negative       | negative       | negative   | negative   | negative  | negative  | negative      |
| P257       | 6.8                  | negative       | negative       | negative   | negative   | negative  | negative  | negative      |
| P257       | 11.0                 | negative       | negative       | negative   | negative   | negative  | negative  | negative      |
| P258       | 0.0                  | negative       | negative       | positive   | negative   | negative  | negative  | positive      |
| P258       | 0.7                  | negative       | negative       | negative   | negative   | negative  | negative  | negative      |
| P258       | 3.2                  | negative       | negative       | negative   | negative   | negative  | negative  | negative      |
| P258       | 10.2                 | negative       | negative       | negative   | negative   | negative  | negative  | negative      |
| P259       | 0.0                  | negative       | negative       | positive   | negative   | negative  | negative  | positive      |
| P259       | 0.9                  | negative       | negative       | negative   | negative   | negative  | negative  | negative      |
| P259       | 4.0                  | negative       | negative       | negative   | negative   | negative  | negative  | negative      |
| P260       | 0.0                  | positive       | positive       | positive   | positive   | positive  | positive  | positive      |
| P260       | 4.4                  | positive       | positive       | positive   | positive   | positive  | positive  | positive      |
| P261       | 0.0                  | negative       | negative       | negative   | negative   | negative  | negative  | negative      |
| P261       | 1.0                  | negative       | negative       | negative   | negative   | negative  | negative  | negative      |

**eTable 3.** Circulating Tumor DNA Results for All 1228 Plasma Samples

| Patient ID | Months after surgery | Septin9_1 Call | Septin9_2 Call | BCAT1 Call | IKZF1 Call | BCAN Call | VAV3 Call | ColonAiQ Call |
|------------|----------------------|----------------|----------------|------------|------------|-----------|-----------|---------------|
| P261       | 3.1                  | negative       | negative       | negative   | negative   | negative  | negative  | negative      |
| P261       | 9.1                  | negative       | negative       | negative   | negative   | negative  | negative  | negative      |
| P262       | 0.0                  | positive       | positive       | positive   | positive   | positive  | positive  | positive      |
| P262       | 0.7                  | negative       | negative       | negative   | negative   | negative  | negative  | negative      |
| P262       | 3.5                  | negative       | negative       | negative   | negative   | negative  | negative  | negative      |
| P262       | 6.4                  | negative       | negative       | negative   | negative   | negative  | negative  | negative      |
| P263       | 0.0                  | positive       | positive       | positive   | positive   | positive  | positive  | positive      |
| P263       | 0.6                  | negative       | negative       | negative   | negative   | negative  | negative  | negative      |
| P263       | 3.2                  | negative       | negative       | negative   | negative   | negative  | negative  | negative      |
| P263       | 9.7                  | negative       | negative       | negative   | negative   | negative  | negative  | negative      |
| P263       | 13.0                 | negative       | negative       | negative   | negative   | negative  | negative  | negative      |
| P264       | 0.0                  | negative       | negative       | negative   | positive   | negative  | negative  | positive      |
| P264       | 0.7                  | negative       | negative       | negative   | negative   | negative  | negative  | negative      |
| P265       | 0.0                  | positive       | positive       | positive   | positive   | positive  | positive  | positive      |
| P265       | 4.2                  | negative       | negative       | negative   | negative   | negative  | negative  | negative      |
| P265       | 6.9                  | negative       | negative       | negative   | negative   | negative  | negative  | negative      |
| P265       | 10.5                 | negative       | negative       | negative   | negative   | negative  | negative  | negative      |
| P266       | 0.0                  | negative       | negative       | negative   | negative   | negative  | negative  | negative      |
| P266       | 0.8                  | negative       | negative       | negative   | negative   | negative  | negative  | negative      |
| P266       | 3.1                  | negative       | negative       | negative   | negative   | negative  | negative  | negative      |
| P266       | 7.6                  | negative       | negative       | negative   | negative   | negative  | negative  | negative      |
| P266       | 11.1                 | negative       | negative       | negative   | negative   | negative  | negative  | negative      |
| P267       | 0.0                  | negative       | negative       | positive   | positive   | negative  | positive  | positive      |
| P267       | 4.6                  | negative       | negative       | positive   | negative   | negative  | negative  | positive      |
| P267       | 9.4                  | negative       | negative       | negative   | negative   | negative  | negative  | negative      |
| P268       | 3.4                  | negative       | negative       | negative   | negative   | negative  | negative  | negative      |
| P268       | 10.2                 | negative       | negative       | negative   | negative   | negative  | negative  | negative      |
| P269       | 0.0                  | positive       | negative       | negative   | negative   | negative  | negative  | positive      |
| P269       | 0.7                  | negative       | negative       | negative   | negative   | negative  | negative  | negative      |
| P269       | 3.9                  | negative       | negative       | negative   | negative   | negative  | negative  | negative      |
| P269       | 6.7                  | negative       | negative       | negative   | negative   | negative  | negative  | negative      |
| P269       | 9.6                  | negative       | negative       | negative   | negative   | negative  | negative  | negative      |
| P269       | 12.6                 | negative       | negative       | negative   | negative   | negative  | negative  | negative      |
| P270       | 0.0                  | negative       | negative       | negative   | positive   | negative  | negative  | positive      |
| P270       | 3.4                  | negative       | negative       | negative   | negative   | negative  | negative  | negative      |
| P271       | 0.0                  | negative       | negative       | negative   | negative   | negative  | negative  | negative      |
| P271       | 0.8                  | negative       | negative       | negative   | negative   | negative  | negative  | negative      |
| P271       | 3.6                  | negative       | negative       | negative   | negative   | negative  | negative  | negative      |
| P271       | 7.1                  | negative       | negative       | negative   | negative   | negative  | negative  | negative      |



**eTable 3.** Circulating Tumor DNA Results for All 1228 Plasma Samples

| Patient ID | Months after surgery | Septin9_1 Call | Septin9_2 Call | BCAT1 Call | IKZF1 Call | BCAN Call | VAV3 Call | ColonAiQ Call |
|------------|----------------------|----------------|----------------|------------|------------|-----------|-----------|---------------|
| P272       | 0.0                  | negative       | positive       | negative   | negative   | negative  | negative  | positive      |
| P272       | 3.5                  | negative       | negative       | negative   | negative   | negative  | negative  | negative      |
| P272       | 6.1                  | negative       | negative       | negative   | negative   | negative  | negative  | negative      |
| P272       | 11.7                 | negative       | negative       | negative   | negative   | negative  | negative  | negative      |
| P273       | 0.0                  | negative       | negative       | negative   | negative   | negative  | negative  | negative      |
| P273       | 0.7                  | negative       | negative       | negative   | negative   | negative  | negative  | negative      |
| P273       | 3.0                  | negative       | negative       | negative   | negative   | negative  | negative  | negative      |
| P273       | 6.4                  | negative       | negative       | negative   | negative   | negative  | negative  | negative      |
| P273       | 9.8                  | negative       | negative       | negative   | negative   | negative  | negative  | negative      |
| P273       | 13.0                 | negative       | negative       | negative   | negative   | negative  | negative  | negative      |
| P274       | 0.0                  | positive       | positive       | positive   | positive   | positive  | positive  | positive      |
| P274       | 1.4                  | positive       | positive       | positive   | positive   | positive  | positive  | positive      |
| P275       | 0.0                  | negative       | positive       | negative   | negative   | negative  | negative  | positive      |
| P275       | 0.7                  | negative       | negative       | negative   | negative   | negative  | negative  | negative      |
| P275       | 4.6                  | negative       | negative       | negative   | negative   | negative  | negative  | negative      |
| P275       | 7.7                  | negative       | negative       | positive   | negative   | negative  | negative  | positive      |
| P275       | 12.6                 | negative       | negative       | negative   | negative   | negative  | negative  | negative      |
| P276       | 0.0                  | negative       | negative       | negative   | positive   | negative  | negative  | positive      |
| P276       | 0.8                  | negative       | negative       | positive   | positive   | positive  | positive  | positive      |
| P276       | 4.2                  | negative       | negative       | negative   | negative   | negative  | negative  | negative      |
| P276       | 7.2                  | negative       | negative       | negative   | negative   | negative  | negative  | negative      |
| P276       | 10.3                 | negative       | negative       | negative   | negative   | negative  | negative  | negative      |
| P276       | 13.2                 | positive       | positive       | negative   | negative   | negative  | negative  | positive      |
| P277       | 0.0                  | negative       | negative       | positive   | positive   | negative  | positive  | positive      |
| P277       | 0.8                  | negative       | negative       | negative   | negative   | negative  | negative  | negative      |
| P277       | 3.2                  | negative       | negative       | negative   | negative   | negative  | negative  | negative      |
| P277       | 6.2                  | negative       | negative       | negative   | negative   | negative  | negative  | negative      |
| P277       | 9.2                  | negative       | negative       | negative   | negative   | negative  | negative  | negative      |
| P278       | 0.0                  | negative       | negative       | negative   | negative   | negative  | positive  | positive      |
| P278       | 1.0                  | negative       | negative       | negative   | negative   | negative  | negative  | negative      |
| P278       | 8.0                  | negative       | negative       | negative   | negative   | negative  | negative  | negative      |
| P279       | 0.0                  | positive       | negative       | negative   | negative   | negative  | negative  | positive      |
| P279       | 0.8                  | negative       | negative       | negative   | negative   | negative  | negative  | negative      |
| P279       | 2.3                  | negative       | negative       | negative   | negative   | negative  | negative  | negative      |
| P279       | 5.8                  | negative       | negative       | negative   | negative   | negative  | negative  | negative      |
| P279       | 8.9                  | negative       | negative       | negative   | negative   | negative  | negative  | negative      |
| P279       | 12.6                 | negative       | negative       | negative   | negative   | negative  | negative  | negative      |
| P280       | 0.0                  | negative       | negative       | negative   | negative   | negative  | negative  | negative      |
| P280       | 1.8                  | negative       | negative       | negative   | negative   | negative  | negative  | negative      |

**eTable 3.** Circulating Tumor DNA Results for All 1228 Plasma Samples

| Patient ID | Months after surgery | Septin9_1 Call | Septin9_2 Call | BCAT1 Call | IKZF1 Call | BCAN Call | VAV3 Call | ColonAiQ Call |
|------------|----------------------|----------------|----------------|------------|------------|-----------|-----------|---------------|
| P280       | 3.0                  | negative       | negative       | negative   | negative   | negative  | negative  | negative      |
| P281       | 0.0                  | negative       | negative       | positive   | positive   | negative  | negative  | positive      |
| P281       | 1.2                  | negative       | negative       | negative   | negative   | negative  | negative  | negative      |
| P281       | 4.3                  | negative       | negative       | negative   | negative   | negative  | negative  | negative      |
| P281       | 8.7                  | negative       | negative       | negative   | negative   | negative  | negative  | negative      |
| P281       | 10.5                 | negative       | negative       | negative   | negative   | negative  | negative  | negative      |
| P282       | 0.0                  | negative       | negative       | negative   | negative   | positive  | negative  | positive      |
| P282       | 1.3                  | negative       | negative       | negative   | negative   | negative  | negative  | negative      |
| P282       | 4.1                  | negative       | negative       | negative   | negative   | negative  | negative  | negative      |
| P282       | 7.1                  | negative       | negative       | negative   | negative   | negative  | negative  | negative      |
| P282       | 9.9                  | negative       | negative       | negative   | negative   | negative  | negative  | negative      |
| P283       | 0.0                  | negative       | negative       | negative   | negative   | negative  | negative  | negative      |
| P283       | 1.8                  | negative       | negative       | negative   | negative   | negative  | negative  | negative      |
| P283       | 7.5                  | negative       | negative       | negative   | negative   | negative  | negative  | negative      |
| P284       | 0.0                  | negative       | negative       | negative   | positive   | negative  | negative  | positive      |
| P284       | 1.4                  | negative       | negative       | negative   | negative   | positive  | negative  | positive      |
| P284       | 4.6                  | negative       | negative       | negative   | negative   | negative  | negative  | negative      |
| P284       | 7.8                  | negative       | negative       | negative   | negative   | negative  | negative  | negative      |
| P285       | 0.0                  | positive       | positive       | negative   | negative   | negative  | negative  | positive      |
| P285       | 1.2                  | negative       | negative       | negative   | negative   | negative  | negative  | negative      |
| P285       | 4.5                  | negative       | negative       | negative   | negative   | negative  | negative  | negative      |
| P285       | 7.5                  | negative       | negative       | negative   | negative   | positive  | negative  | positive      |
| P286       | 0.0                  | negative       | negative       | negative   | positive   | negative  | negative  | positive      |
| P286       | 1.1                  | negative       | negative       | negative   | negative   | negative  | negative  | negative      |
| P286       | 5.2                  | negative       | negative       | negative   | negative   | negative  | negative  | negative      |
| P287       | 0.0                  | positive       | positive       | positive   | positive   | negative  | negative  | positive      |
| P287       | 1.0                  | negative       | negative       | positive   | positive   | negative  | negative  | positive      |
| P287       | 4.2                  | negative       | negative       | negative   | negative   | positive  | negative  | positive      |
| P288       | 0.0                  | positive       | negative       | positive   | negative   | negative  | negative  | positive      |
| P288       | 1.6                  | negative       | negative       | negative   | negative   | negative  | negative  | negative      |
| P288       | 6.8                  | negative       | negative       | negative   | negative   | negative  | negative  | negative      |
| P289       | 0.0                  | negative       | negative       | negative   | negative   | negative  | negative  | negative      |
| P289       | 2.0                  | negative       | negative       | negative   | negative   | negative  | negative  | negative      |
| P289       | 5.2                  | positive       | positive       | positive   | positive   | negative  | positive  | positive      |
| P290       | 0.0                  | positive       | negative       | positive   | positive   | negative  | positive  | positive      |
| P290       | 1.2                  | negative       | negative       | negative   | positive   | negative  | negative  | positive      |
| P290       | 4.4                  | negative       | negative       | negative   | negative   | negative  | negative  | negative      |
| P290       | 7.2                  | negative       | negative       | negative   | negative   | negative  | negative  | negative      |
| P291       | 0.0                  | positive       | negative       | positive   | negative   | negative  | negative  | positive      |

**eTable 3.** Circulating Tumor DNA Results for All 1228 Plasma Samples

| Patient ID | Months after surgery | Septin9_1 Call | Septin9_2 Call | BCAT1 Call | IKZF1 Call | BCAN Call | VAV3 Call | ColonAiQ Call |
|------------|----------------------|----------------|----------------|------------|------------|-----------|-----------|---------------|
| P291       | 1.1                  | negative       | negative       | negative   | negative   | negative  | negative  | negative      |
| P291       | 4.7                  | negative       | negative       | negative   | negative   | negative  | negative  | negative      |
| P292       | 0.0                  | negative       | negative       | positive   | negative   | negative  | negative  | positive      |
| P292       | 2.8                  | positive       | positive       | positive   | negative   | positive  | negative  | positive      |
| P292       | 4.9                  | positive       | positive       | positive   | negative   | positive  | positive  | positive      |
| P293       | 0.0                  | positive       | positive       | positive   | negative   | positive  | negative  | positive      |
| P293       | 0.7                  | positive       | positive       | positive   | negative   | positive  | negative  | positive      |
| P294       | 0.0                  | positive       | positive       | positive   | positive   | positive  | positive  | positive      |
| P294       | 0.7                  | positive       | positive       | positive   | positive   | positive  | positive  | positive      |
| P295       | 0.0                  | negative       | negative       | positive   | positive   | negative  | positive  | positive      |
| P295       | 0.9                  | negative       | negative       | negative   | negative   | negative  | negative  | negative      |
| P296       | 0.0                  | positive       | positive       | positive   | positive   | positive  | positive  | positive      |
| P296       | 0.8                  | positive       | positive       | positive   | positive   | positive  | positive  | positive      |
| P297       | 0.0                  | positive       | positive       | positive   | positive   | positive  | negative  | positive      |
| P297       | 0.9                  | positive       | positive       | positive   | positive   | positive  | negative  | positive      |
| P298       | 0.0                  | positive       | positive       | positive   | positive   | positive  | positive  | positive      |
| P298       | 1.0                  | positive       | positive       | positive   | positive   | positive  | positive  | positive      |
| P299       | 0.0                  | positive       | positive       | positive   | negative   | positive  | negative  | positive      |
| P299       | 0.7                  | positive       | positive       | positive   | negative   | positive  | negative  | positive      |

**eTable 4.** Preoperative and Postoperative (POM1) Carcinoembryonic Antigen (CEA) Results

| Patient ID | CEA value (ng/mL; Pre-op) | CEA result (Pre-op) | CEA value (ng/mL; POM1) | CEA result (POM1) |
|------------|---------------------------|---------------------|-------------------------|-------------------|
| P1         | 3.21                      | negative            | 3.1                     | negative          |
| P2         | 3.83                      | negative            | 6.1                     | positive          |
| P3         | 7.71                      | positive            | 4.81                    | negative          |
| P4         | 7.18                      | positive            | 2.31                    | negative          |
| P5         | 6.86                      | positive            | 3.69                    | negative          |
| P6         | 54.1                      | positive            | 4.72                    | negative          |
| P7         | 1.87                      | negative            | 1.2                     | negative          |
| P8         | 2.76                      | negative            | 1.8                     | negative          |
| P9         | 14.8                      | positive            | 1.74                    | negative          |
| P10        | 1.3                       | negative            | 0.95                    | negative          |
| P11        | 2.27                      | negative            | 3.21                    | negative          |
| P12        | 4.2                       | negative            | 1.98                    | negative          |
| P13        | 3.89                      | negative            | 1.31                    | negative          |
| P14        | 73.4                      | positive            | 21.5                    | positive          |
| P15        | 2.71                      | negative            | 4.5                     | negative          |
| P16        | 36.5                      | positive            | 23.81                   | positive          |
| P17        | 16.3                      | positive            | 2.81                    | negative          |
| P18        | 3.37                      | negative            | 2.3                     | negative          |
| P19        | 3.11                      | negative            | 2.31                    | negative          |
| P20        | 31.2                      | positive            | 3.91                    | negative          |
| P21        | 2.29                      | negative            | 1.7                     | negative          |
| P22        | 46.1                      | positive            | 4.58                    | negative          |
| P23        | 11.2                      | positive            | 3.6                     | negative          |
| P24        | 6.54                      | positive            | 4.1                     | negative          |
| P25        | 7.7                       | positive            | 3.3                     | negative          |
| P26        | 7.94                      | positive            | 4.4                     | negative          |
| P27        | 1.99                      | negative            | 1.2                     | negative          |
| P28        | 11.11                     | positive            | 2.1                     | negative          |
| P29        | 9.05                      | positive            | 1.5                     | negative          |
| P30        | 1.88                      | negative            | 1.1                     | negative          |
| P31        | 1.75                      | negative            | 1.2                     | negative          |
| P32        | 1.91                      | negative            | 1.11                    | negative          |
| P33        | 9.28                      | positive            | 5.8                     | positive          |
| P34        | 37.2                      | positive            | 8.9                     | positive          |
| P35        | 2.17                      | negative            | 2.2                     | negative          |
| P36        | 1.2                       | negative            | 1.02                    | negative          |
| P37        | 3.11                      | negative            | 3.3                     | negative          |
| P38        | 1.33                      | negative            | 1.27                    | negative          |

**eTable 4.** Preoperative and Postoperative (POM1) Carcinoembryonic Antigen (CEA) Results

| Patient ID | CEA value (ng/mL; Pre-op) | CEA result (Pre-op) | CEA value (ng/mL; POM1) | CEA result (POM1) |
|------------|---------------------------|---------------------|-------------------------|-------------------|
| P39        | 2.48                      | negative            | 2.76                    | negative          |
| P40        | 3.78                      | negative            | 3.56                    | negative          |
| P41        | 3.03                      | negative            | 2.3                     | negative          |
| P42        | 7.08                      | positive            | 3.2                     | negative          |
| P43        | 4.04                      | negative            | 1.3                     | negative          |
| P44        | 1.3                       | negative            | 3.4                     | negative          |
| P45        | 7.62                      | positive            | 3.6                     | negative          |
| P46        | 4.34                      | negative            | 4.1                     | negative          |
| P47        | 4.61                      | negative            | 3.67                    | negative          |
| P48        | 4.31                      | negative            | 2.39                    | negative          |
| P49        | 7.94                      | positive            | 1.81                    | negative          |
| P50        | 36                        | positive            | 2.75                    | negative          |
| P51        | 3.87                      | negative            | 2.1                     | negative          |
| P52        | 60                        | positive            | 4.8                     | negative          |
| P53        | 7.63                      | positive            | 4.1                     | negative          |
| P54        | 3.33                      | negative            | 2.1                     | negative          |
| P55        | 5.58                      | positive            | 1.2                     | negative          |
| P56        | 0.42                      | negative            | 2.1                     | negative          |
| P57        | 3.17                      | negative            | 2.12                    | negative          |
| P58        | 4.67                      | negative            | 2.1                     | negative          |
| P59        | 2.66                      | negative            | 1.85                    | negative          |
| P60        | 13.2                      | positive            | 1.88                    | negative          |
| P61        | 7.98                      | positive            | 1.96                    | negative          |
| P62        | 21.91                     | positive            | 4.43                    | negative          |
| P63        | 2.73                      | negative            | 3.2                     | negative          |
| P64        | 2.55                      | negative            | 1.28                    | negative          |
| P65        | 2.63                      | negative            | 1.2                     | negative          |
| P66        | 3.23                      | negative            | 2.93                    | negative          |
| P67        | 1.22                      | negative            | 1.4                     | negative          |
| P68        | 1.36                      | negative            | 2.6                     | negative          |
| P69        | 1.68                      | negative            | 1.3                     | negative          |
| P70        | 19.3                      | positive            | 1.42                    | negative          |
| P71        | 3.31                      | negative            | 1.88                    | negative          |
| P72        | 4.63                      | negative            | 3.13                    | negative          |
| P73        | 9.74                      | positive            | 1.76                    | negative          |
| P74        | 2.9                       | negative            | 3.1                     | negative          |
| P75        | 2.67                      | negative            | 1.07                    | negative          |
| P76        | 13.19                     | positive            | 3.98                    | negative          |

**eTable 4.** Preoperative and Postoperative (POM1) Carcinoembryonic Antigen (CEA) Results

| Patient ID | CEA value (ng/mL; Pre-op) | CEA result (Pre-op) | CEA value (ng/mL; POM1) | CEA result (POM1) |
|------------|---------------------------|---------------------|-------------------------|-------------------|
| P77        | 1.18                      | negative            | 0.62                    | negative          |
| P78        | 1.63                      | negative            | 0.95                    | negative          |
| P79        | 2.16                      | negative            | 1.49                    | negative          |
| P80        | 2.19                      | negative            | 2.1                     | negative          |
| P81        | 4.3                       | negative            | 1.64                    | negative          |
| P82        | 10.6                      | positive            | 4.2                     | negative          |
| P83        | 2.6                       | negative            | 4.1                     | negative          |
| P84        | 25.2                      | positive            | 2.06                    | negative          |
| P85        | 3.59                      | negative            | 2.3                     | negative          |
| P86        | 1.66                      | negative            | 3.2                     | negative          |
| P87        | 2.79                      | negative            | 1.83                    | negative          |
| P88        | 1.12                      | negative            | 0.88                    | negative          |
| P89        | 1.81                      | negative            | 1.93                    | negative          |
| P90        | 116                       | positive            | 4.6                     | negative          |
| P91        | 2.79                      | negative            | 3.3                     | negative          |
| P92        | 2.62                      | negative            | 2.1                     | negative          |
| P93        | 11.5                      | positive            | 1.8                     | negative          |
| P94        | 1.15                      | negative            | 2.1                     | negative          |
| P95        | 2.64                      | negative            | 2.1                     | negative          |
| P96        | 53.88                     | positive            | 5.9                     | positive          |
| P97        | 8.12                      | positive            | 5.72                    | positive          |
| P98        | 1.84                      | negative            | 1.31                    | negative          |
| P99        | 49.4                      | positive            | 6.45                    | positive          |
| P100       | 1.92                      | negative            | 1.87                    | negative          |
| P101       | 9.58                      | positive            | 3.3                     | negative          |
| P102       | 0.69                      | negative            | 4.2                     | negative          |
| P103       | 5.05                      | negative            | 2.54                    | negative          |
| P104       | 7.24                      | positive            | 2.1                     | negative          |
| P105       | 2.06                      | negative            | 1.2                     | negative          |
| P106       | 28.6                      | positive            | 2.6                     | negative          |
| P107       | 1.18                      | negative            | 0.88                    | negative          |
| P108       | 1.94                      | negative            | 1.51                    | negative          |
| P109       | 1.15                      | negative            | 4.3                     | negative          |
| P110       | 5.95                      | positive            | 2.6                     | negative          |
| P111       | 1.2                       | negative            | 3.1                     | negative          |
| P112       | 4.83                      | negative            | 4.2                     | negative          |
| P113       | 13.4                      | positive            | 3.62                    | negative          |
| P114       | 0.87                      | negative            | 1.5                     | negative          |

---

**eTable 4.** Preoperative and Postoperative (POM1) Carcinoembryonic Antigen (CEA) Results

---

| Patient ID | CEA value (ng/mL; Pre-op) | CEA result (Pre-op) | CEA value (ng/mL; POM1) | CEA result (POM1) |
|------------|---------------------------|---------------------|-------------------------|-------------------|
| P115       | 1.8                       | negative            | 1.3                     | negative          |
| P116       | 5.63                      | positive            | 4.35                    | negative          |
| P117       | 1.61                      | negative            | 1.1                     | negative          |
| P118       | 48.6                      | positive            | 10.5                    | positive          |
| P119       | 19.4                      | positive            | 7.77                    | positive          |
| P120       | 1.48                      | negative            | 1.8                     | negative          |
| P121       | 0.41                      | negative            | 0.47                    | negative          |
| P122       | 7.37                      | positive            | 3.43                    | negative          |
| P123       | 5.15                      | negative            | 4.2                     | negative          |
| P124       | 24.4                      | positive            | 3.2                     | negative          |
| P125       | 3.08                      | negative            | 0.68                    | negative          |
| P126       | 3.96                      | negative            | 3.74                    | negative          |
| P127       | 3.84                      | negative            | 1.69                    | negative          |
| P128       | 3.12                      | negative            | 1.6                     | negative          |
| P129       | 6.72                      | positive            | 2.3                     | negative          |
| P130       | 1.08                      | negative            | 0.9                     | negative          |
| P131       | 2.57                      | negative            | 2.1                     | negative          |
| P132       | 1.16                      | negative            | 1.1                     | negative          |
| P133       | 3.16                      | negative            | 1.5                     | negative          |
| P134       | 1.86                      | negative            | 1.64                    | negative          |
| P135       | 1.84                      | negative            | 1                       | negative          |
| P136       | 3.71                      | negative            | 2.3                     | negative          |
| P137       | 9.51                      | positive            | 1.32                    | negative          |
| P138       | 20.2                      | positive            | 4.91                    | negative          |
| P139       | 1.83                      | negative            | 1.52                    | negative          |
| P140       | 2.9                       | negative            | 0.99                    | negative          |
| P141       | 3.77                      | negative            | 1.3                     | negative          |
| P142       | 8.02                      | positive            | 4.5                     | negative          |
| P143       | 2.45                      | negative            | 2.3                     | negative          |
| P144       | 0.51                      | negative            | 0.62                    | negative          |
| P145       | 3.01                      | negative            | 1.96                    | negative          |
| P146       | 3.23                      | negative            | 2.67                    | negative          |
| P147       | 3.31                      | negative            | 2.07                    | negative          |
| P148       | 1.11                      | negative            | 0.99                    | negative          |
| P149       | 4.57                      | negative            | 3.56                    | negative          |
| P150       | 2.18                      | negative            | 1.2                     | negative          |
| P151       | 3.81                      | negative            | 4.1                     | negative          |
| P152       | 10.3                      | positive            | 2.1                     | negative          |

---

---

**eTable 4.** Preoperative and Postoperative (POM1) Carcinoembryonic Antigen (CEA) Results

---

| Patient ID | CEA value (ng/mL; Pre-op) | CEA result (Pre-op) | CEA value (ng/mL; POM1) | CEA result (POM1) |
|------------|---------------------------|---------------------|-------------------------|-------------------|
| P153       | 324                       | positive            | 22.9                    | positive          |
| P154       | 1.32                      | negative            | 1.13                    | negative          |
| P155       | 4.24                      | negative            | 3.2                     | negative          |
| P156       | 10.7                      | positive            | 1.33                    | negative          |
| P157       | 0.96                      | negative            | 0.8                     | negative          |
| P158       | 8.96                      | positive            | 1.41                    | negative          |
| P159       | 2.69                      | negative            | 2.1                     | negative          |
| P160       | 2.08                      | negative            | 1.22                    | negative          |
| P161       | 0.98                      | negative            | 0.85                    | negative          |
| P162       | 25.1                      | positive            | 50.09                   | positive          |
| P163       | 3.17                      | negative            | 3.3                     | negative          |
| P164       | 7.12                      | positive            | 1.65                    | negative          |
| P165       | 12.2                      | positive            | 2.08                    | negative          |
| P166       | 188                       | positive            | 17.8                    | positive          |
| P167       | 1.87                      | negative            | 1.2                     | negative          |
| P168       | 2.4                       | negative            | 1.2                     | negative          |
| P169       | 3.33                      | negative            | 2.9                     | negative          |
| P170       | 1.82                      | negative            | 3.1                     | negative          |
| P171       | 53.7                      | positive            | 3.54                    | negative          |
| P172       | 2.01                      | negative            | 2.6                     | negative          |
| P173       | 4.88                      | negative            | 2.61                    | negative          |
| P174       | 17.86                     | positive            | 1.83                    | negative          |
| P175       | 3.53                      | negative            | 2.23                    | negative          |
| P176       | 20.6                      | positive            | 2.52                    | negative          |
| P177       | 1.46                      | negative            | 1.31                    | negative          |
| P178       | 4.1                       | negative            | 3.23                    | negative          |
| P179       | 5.49                      | positive            | 5                       | negative          |
| P180       | 2.44                      | negative            | 2.14                    | negative          |
| P181       | 1.12                      | negative            | 0.45                    | negative          |
| P182       | 0.87                      | negative            | 0.88                    | negative          |
| P183       | 3.06                      | negative            | 2.4                     | negative          |
| P184       | 18.27                     | positive            | 1.83                    | negative          |
| P185       | 12.46                     | positive            | 3.39                    | negative          |
| P186       | 6.79                      | positive            | 1.56                    | negative          |
| P187       | 1.82                      | negative            | 1.3                     | negative          |
| P188       | 7.67                      | positive            | 3                       | negative          |
| P189       | 1.33                      | negative            | 1.05                    | negative          |
| P190       | 2.28                      | negative            | 2.1                     | negative          |

---



**eTable 4.** Preoperative and Postoperative (POM1) Carcinoembryonic Antigen (CEA) Results

| Patient ID | CEA value (ng/mL; Pre-op) | CEA result (Pre-op) | CEA value (ng/mL; POM1) | CEA result (POM1) |
|------------|---------------------------|---------------------|-------------------------|-------------------|
| P191       | 4.47                      | negative            | 3.2                     | negative          |
| P192       | 1.46                      | negative            | 1.75                    | negative          |
| P193       | 6.07                      | positive            | 3.2                     | negative          |
| P194       | 4.14                      | negative            | 3.9                     | negative          |
| P195       | 3.43                      | negative            | 1.6                     | negative          |
| P196       | 16.29                     | positive            | 4.2                     | negative          |
| P197       | 4.98                      | negative            | 1.96                    | negative          |
| P198       | 18.82                     | positive            | 4.9                     | negative          |
| P199       | 2.96                      | negative            | 2.73                    | negative          |
| P200       | 1.48                      | negative            | 1.2                     | negative          |
| P201       | 4.54                      | negative            | 3.9                     | negative          |
| P202       | 2.58                      | negative            | 2.6                     | negative          |
| P203       | 3.47                      | negative            | 2.1                     | negative          |
| P204       | 10.4                      | positive            | 2.33                    | negative          |
| P205       | 3.68                      | negative            | 3.1                     | negative          |
| P206       | 3.34                      | negative            | 1.82                    | negative          |
| P207       | 5.09                      | negative            | 2.87                    | negative          |
| P208       | 1.13                      | negative            | 0.81                    | negative          |
| P209       | 1.59                      | negative            | 1.66                    | negative          |
| P210       | 3.81                      | negative            | 2.1                     | negative          |
| P211       | 1.2                       | negative            | 1.2                     | negative          |
| P212       | 20.9                      | positive            | 2.49                    | negative          |
| P213       | 2.49                      | negative            | 1.8                     | negative          |
| P214       | 14.8                      | positive            | 2.67                    | negative          |
| P215       | 5.52                      | positive            | 3.6                     | negative          |
| P216       | 1.91                      | negative            | 2.6                     | negative          |
| P217       | 37                        | positive            | 3.64                    | negative          |
| P218       | 11.5                      | positive            | 1.69                    | negative          |
| P219       | 2.78                      | negative            | 2.1                     | negative          |
| P220       | 2.56                      | negative            | 2.4                     | negative          |
| P221       | 1.93                      | negative            | 0.81                    | negative          |
| P222       | 2.84                      | negative            | 4.8                     | negative          |
| P223       | 2.81                      | negative            | 1.86                    | negative          |
| P224       | 6.95                      | positive            | 1.92                    | negative          |
| P225       | 2.83                      | negative            | 2.1                     | negative          |
| P226       | 1.58                      | negative            | 1.15                    | negative          |
| P227       | 4.38                      | negative            | 1.89                    | negative          |
| P228       | 2.35                      | negative            | 1.8                     | negative          |

---

**eTable 4.** Preoperative and Postoperative (POM1) Carcinoembryonic Antigen (CEA) Results

---

| Patient ID | CEA value (ng/mL; Pre-op) | CEA result (Pre-op) | CEA value (ng/mL; POM1) | CEA result (POM1) |
|------------|---------------------------|---------------------|-------------------------|-------------------|
| P229       | 3.23                      | negative            | 1.58                    | negative          |
| P230       | 1.43                      | negative            | 1.1                     | negative          |
| P231       | 7.23                      | positive            | 4.1                     | negative          |
| P232       | 3.81                      | negative            | 2.34                    | negative          |
| P233       | 25.6                      | positive            | 3.22                    | negative          |
| P234       | 2.84                      | negative            | 1.18                    | negative          |
| P235       | 1.87                      | negative            | 1.3                     | negative          |
| P236       | 1.78                      | negative            | 1.2                     | negative          |
| P237       | 1.35                      | negative            | 1.1                     | negative          |
| P238       | 1.37                      | negative            | 0.7                     | negative          |
| P239       | 3.68                      | negative            | 1.77                    | negative          |
| P240       | 2.73                      | negative            | 2.5                     | negative          |
| P241       | 4.48                      | negative            | 4.1                     | negative          |
| P242       | 6.99                      | positive            | 2.2                     | negative          |
| P243       | 17.5                      | positive            | 4.6                     | negative          |
| P244       | 4.65                      | negative            | 2.63                    | negative          |
| P245       | 1.56                      | negative            | 1.4                     | negative          |
| P246       | 1.28                      | negative            | 1.1                     | negative          |
| P247       | 1.39                      | negative            | 1.2                     | negative          |
| P248       | 3.13                      | negative            | 3.8                     | negative          |
| P249       | 2.17                      | negative            | 1.81                    | negative          |
| P250       | 2.29                      | negative            | 2.1                     | negative          |
| P251       | 1.98                      | negative            | 1.1                     | negative          |
| P252       | 2.31                      | negative            | 2.2                     | negative          |
| P253       | 2.06                      | negative            | 3.1                     | negative          |
| P254       | 2.99                      | negative            | 2.1                     | negative          |
| P255       | 4.78                      | negative            | 7.1                     | positive          |
| P256       | 27.9                      | positive            | 7.8                     | positive          |
| P257       | 3.4                       | negative            | 2.15                    | negative          |
| P258       | 1.81                      | negative            | 1.1                     | negative          |
| P259       | 2.49                      | negative            | 2.1                     | negative          |
| P260       | 6.9                       | positive            | 4.8                     | negative          |
| P261       | 1.79                      | negative            | 1.28                    | negative          |
| P262       | 41.4                      | positive            | 1.8                     | negative          |
| P263       | 1.56                      | negative            | 1.53                    | negative          |
| P264       | 37.4                      | positive            | 3.3                     | negative          |
| P265       | 1.39                      | negative            | NA                      | NA                |
| P266       | 58.7                      | positive            | 6.1                     | positive          |

---

**eTable 4.** Preoperative and Postoperative (POM1) Carcinoembryonic Antigen (CEA) Results

| Patient ID | CEA value (ng/mL; Pre-op) | CEA result (Pre-op) | CEA value (ng/mL; POM1) | CEA result (POM1) |
|------------|---------------------------|---------------------|-------------------------|-------------------|
| P267       | 2.29                      | negative            | 5.4                     | positive          |
| P268       | 2.65                      | negative            | 1.2                     | negative          |
| P269       | 29.2                      | positive            | 7.3                     | positive          |
| P270       | 7.83                      | positive            | NA                      | NA                |
| P271       | 1.2                       | negative            | 5.4                     | positive          |
| P272       | 5.93                      | positive            | 1.06                    | negative          |
| P273       | 2.97                      | negative            | 2.1                     | negative          |
| P274       | 392                       | positive            | 872                     | positive          |
| P275       | 2.28                      | negative            | 1.01                    | negative          |
| P276       | 2.64                      | negative            | NA                      | NA                |
| P277       | 10.8                      | positive            | 1.67                    | negative          |
| P278       | 29.1                      | positive            | 4.04                    | negative          |
| P279       | 1.62                      | negative            | NA                      | NA                |
| P280       | 1.45                      | negative            | NA                      | NA                |
| P281       | 1.59                      | negative            | NA                      | NA                |
| P282       | 1.28                      | negative            | NA                      | NA                |
| P283       | 2.71                      | negative            | NA                      | NA                |
| P284       | 2.05                      | negative            | NA                      | NA                |
| P285       | 1.81                      | negative            | NA                      | NA                |
| P286       | 8.31                      | positive            | NA                      | NA                |
| P287       | 10.2                      | positive            | NA                      | NA                |
| P288       | 0.97                      | negative            | NA                      | NA                |
| P289       | 2.11                      | negative            | NA                      | NA                |
| P290       | 1.5                       | negative            | 1.53                    | negative          |
| P291       | 3.35                      | negative            | NA                      | NA                |
| P292       | NA                        | NA                  | NA                      | NA                |
| P293       | 316                       | positive            | 292                     | positive          |
| P294       | 7.63                      | positive            | 26.7                    | positive          |
| P295       | 17.9                      | positive            | 2.01                    | negative          |
| P296       | 5.64                      | positive            | 5.89                    | positive          |
| P297       | 15.9                      | positive            | 20.76                   | positive          |
| P298       | 3.69                      | negative            | 1.2                     | negative          |
| P299       | 145                       | positive            | 266.4                   | positive          |

---

**eTable 5.** Number of Recurrent Patients According to Circulating Tumor DNA Status at Postoperative Month 1 (POM1)

|     | ctDNA positive |                 | ctDNA negative |                 |
|-----|----------------|-----------------|----------------|-----------------|
|     | Recurrence     | Recurrence-free | Recurrence     | Recurrence-free |
| NO. | 39             | 20              | 11             | 185             |

---

**eTable 6.** Multivariable Cox Analysis of Recurrence-Free Survival by Circulating Tumor DNA and Carcinoembryonic Antigen (CEA) Status at Postoperative Month 1

| Variable                              | HR (95% CI)     | P      |
|---------------------------------------|-----------------|--------|
| CEA at POM1 (positive vs. negative)   | 9.3 (4.5-19.0)  | <0.001 |
| ctDNA at POM1 (positive vs. negative) | 19.2 (9.5-38.7) | <0.001 |

---

**eTable 7.** Performance of 6 Methylated DNA Markers of ColonAiQ in Detecting Colorectal Cancer Recurrence

|           | Recurrence |          | Recurrence-free |          | Sensitivity (%) | Specificity (%) |
|-----------|------------|----------|-----------------|----------|-----------------|-----------------|
|           | positive   | negative | positive        | negative |                 |                 |
| Septin9_1 | 26         | 24       | 10              | 195      | 52.0            | 95.1            |
| Septin9_2 | 23         | 27       | 3               | 202      | 46.0            | 98.5            |
| BCAT1     | 23         | 27       | 6               | 199      | 46.0            | 97.1            |
| IKZF1     | 22         | 28       | 6               | 199      | 44.0            | 97.1            |
| BCAN      | 19         | 31       | 5               | 200      | 38.0            | 97.6            |
| VAV3      | 13         | 37       | 5               | 200      | 26.0            | 97.6            |
| ColonAiQ  | 39         | 11       | 20              | 185      | 78.0            | 90.2            |

Septin9\_1: Septin9 locus 1; Septin9\_2: Septin9 locus 2.

**eTable 8.** Performance Estimates of Circulating Tumor DNA and Carcinoembryonic Antigen (CEA) Status at Postoperative Month 1 for Detecting Recurrence in Single and Combined Diagnoses

|                 |                 | ctDNA | CEA  | Combination |
|-----------------|-----------------|-------|------|-------------|
| positive        | Recurrence      | 37    | 14   | 40          |
|                 | Recurrence-free | 18    | 9    | 26          |
| negative        | Recurrence      | 11    | 34   | 8           |
|                 | Recurrence-free | 175   | 184  | 167         |
| Sensitivity (%) |                 | 77.1  | 29.2 | 83.3        |
| Specificity (%) |                 | 90.7  | 95.3 | 86.5        |

**eTable 9.** Number of Recurring Patients According to Circulating Tumor DNA Status at Postoperative Month 1 (POM1) in Stage II and III ACT-Treated Patients in the Subgroup Analysis

| Stage III (100)             | ctDNA status (POM1) | Recurrence | Recurrence-free | Sensitivity | Specificity |
|-----------------------------|---------------------|------------|-----------------|-------------|-------------|
| Clinical high risk          | Positive            | 11         | 4               | 73.3%       | 88.9%       |
|                             | Negative            | 4          | 32              |             |             |
| Clinical low risk           | Positive            | 7          | 5               | 77.8%       | 87.5%       |
|                             | Negative            | 2          | 35              |             |             |
| 3 months                    | Positive            | 8          | 5               | 80.0%       | 79.2%       |
|                             | Negative            | 2          | 19              |             |             |
| 6 months                    | Positive            | 10         | 4               | 71.4%       | 92.3%       |
|                             | Negative            | 4          | 48              |             |             |
| Clinical high risk-3 months | Positive            | 4          | 0               | 80.0%       | 100.0%      |
|                             | Negative            | 1          | 5               |             |             |
| Clinical high risk-6 months | Positive            | 7          | 4               | 70.0%       | 87.1%       |
|                             | Negative            | 3          | 27              |             |             |
| Clinical low risk-3 months  | Positive            | 4          | 5               | 80.0%       | 73.7%       |
|                             | Negative            | 1          | 14              |             |             |
| Clinical low risk-6 months  | Positive            | 3          | 0               | 75.0%       | 100.0%      |
|                             | Negative            | 1          | 21              |             |             |
| <b>Stage II (62)</b>        |                     |            |                 |             |             |
| Clinical high risk          | Positive            | 2          | 4               | 66.7%       | 88.9%       |
|                             | Negative            | 1          | 32              |             |             |
| Clinical low risk           | Positive            | 1          | 2               | 50.0%       | 90.5%       |
|                             | Negative            | 1          | 19              |             |             |
| 3 months                    | Positive            | 1          | 2               | 100.0%      | 91.7%       |
|                             | Negative            | 0          | 22              |             |             |
| 6 months                    | Positive            | 2          | 4               | 50.0%       | 87.9%       |
|                             | Negative            | 2          | 29              |             |             |
| Clinical high risk-3 months | Positive            | 1          | 2               | 100.0%      | 88.2%       |
|                             | Negative            | 0          | 15              |             |             |
| Clinical high risk-6 months | Positive            | 1          | 2               | 50.0%       | 89.5%       |
|                             | Negative            | 1          | 17              |             |             |
| Clinical low risk-3 months  | Positive            | 0          | 0               | NA          | 100.0%      |
|                             | Negative            | 0          | 7               |             |             |
| Clinical low risk-6 months  | Positive            | 1          | 2               | 50.0%       | 85.7%       |
|                             | Negative            | 1          | 12              |             |             |



**eTable 10.** Univariate Cox Analysis of Recurrence-Free Survival by Postoperative Circulating Tumor DNA Status at Postoperative Month 1 in Patients With Stage III Cancer With Different Clinical Risk Stratification and Adjuvant Chemotherapy (ACT) Treatment Durations

P values were determined using the log-rank test. POM1: Postoperative month 1.

| Stage III-ctDNA status (POM1) | HR (95% CI)        | P value          |
|-------------------------------|--------------------|------------------|
| Clinical high risk            | 11.6 (3.6-36.9)    | <b>&lt;0.001</b> |
| Clinical low risk             | 12.3 (2.5-59.7)    | <b>&lt;0.001</b> |
| 3 months                      | 7.5 (1.6-35.8)     | <b>0.0038</b>    |
| 6 months                      | 15.6 (4.8-50.3)    | <b>&lt;0.001</b> |
| Clinical high risk-3 months   | 8543000000 (0-Inf) | <b>0.0011</b>    |
| Clinical high risk-6 months   | 9.2 (2.4-36.0)     | <b>&lt;0.001</b> |
| Clinical low risk-3 months    | 5.5 (0.6-51.3)     | 0.095            |
| Clinical low risk-6 months    | 55.7 (5.3-590.4)   | <b>&lt;0.001</b> |

---

**eTable 11.** Compliance Rates at the Key Times

| Time point | Planned patients | Available patients | Compliance rate |
|------------|------------------|--------------------|-----------------|
| POM1       | 299              | 255                | 85.3%           |
| Post-ACT   | 211              | 149                | 70.6%           |

POM1: Postoperative month 1; Post-ACT: Post adjuvant chemotherapy

**Figure 1.** Preoperative Detection of Circulating Tumor DNA and Carcinoembryonic Antigen (CEA) in Patients With Stage I to III Colorectal Cancer

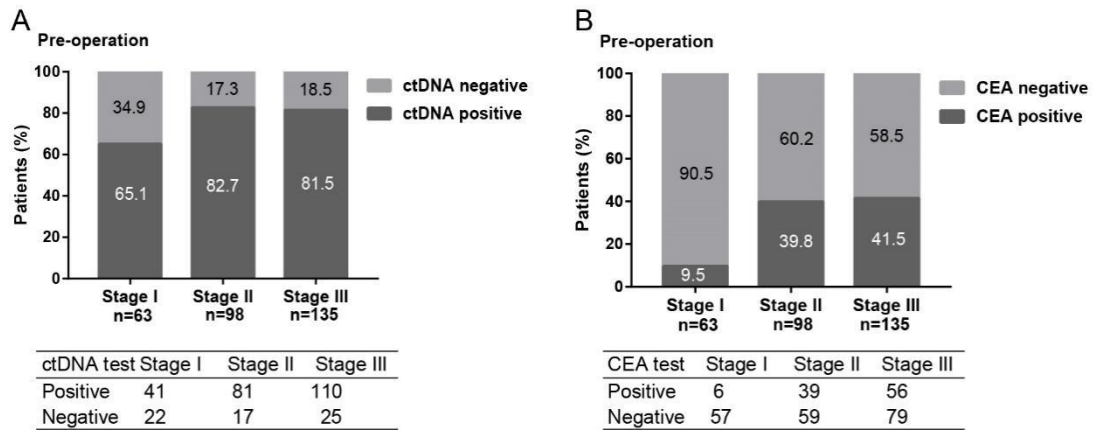

**eFigure 2.** Patients With Recurrence in Preoperative Circulating Tumor DNA (Carcinoembryonic Antigen [CEA])–positive and Circulating Tumor DNA (CEA)–Negative Patients

A. ctDNA and CEA positivity rates in patients with recurrence are shown. B. Recurrence rates in ctDNA and CEA-negative patients. Pre-op: pre-operation.

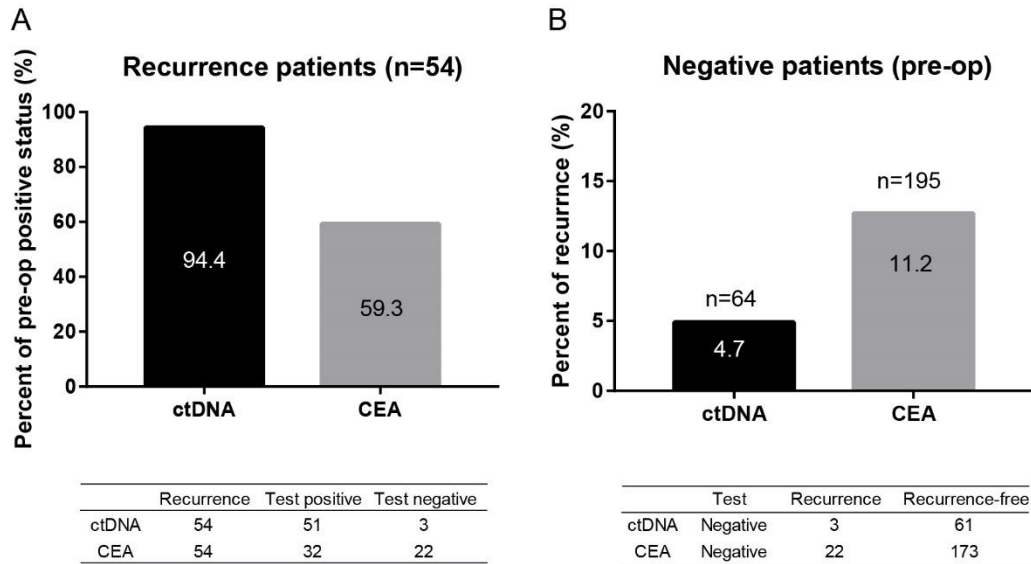

**eFigure 3. Prognostic Value by Stages**

Kaplan–Meier estimates of recurrence-free survival (RFS) stratified by ctDNA status at postoperative month 1 for patients with stage I-III disease (A-C). P values were determined using the log-rank test. D. ColonAiQ results in patients with stage I-III disease. CI: confidence interval; HR: hazard ratio.

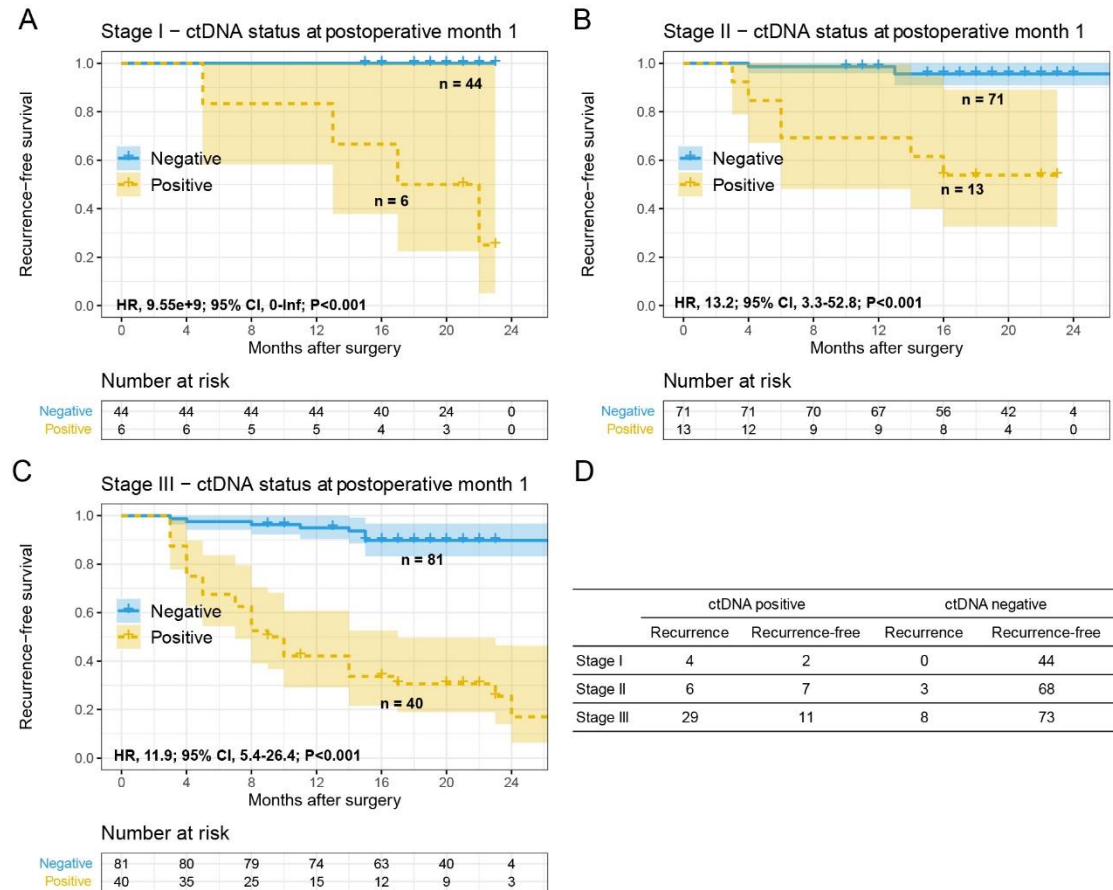

**eFigure 4.** Kaplan-Meier Estimates of Recurrence-Free Survival (RFS) Stratified by Carcinoembryonic Antigen (CEA) Status at Postoperative Month 1 for Patients Whose Preoperative CEA Levels Were Positive or Negative  
 CI: confidence interval; HR: hazard ratio; Pre-op: pre-operation; POM1: Postoperative month 1.

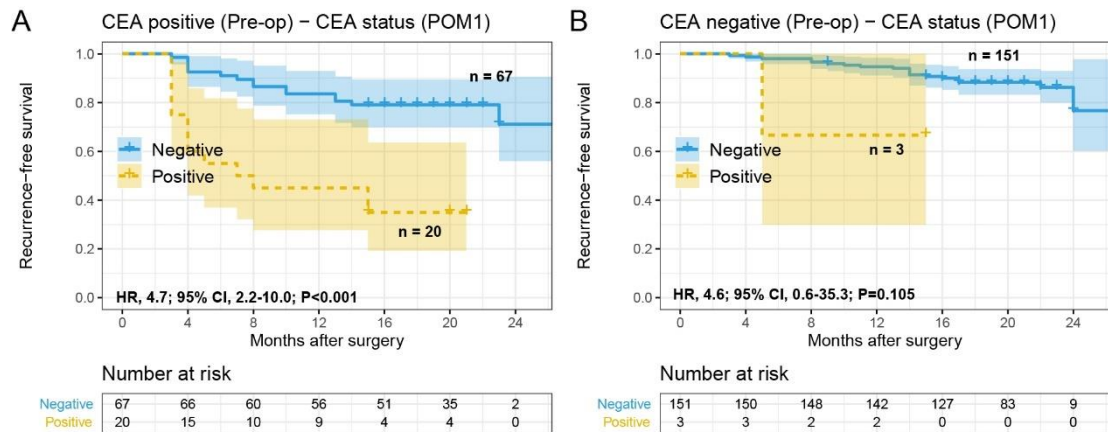

**Figure 5.** Subgroup Analysis of Circulating Tumor DNA Status in Patients With Preoperative and Postoperative Carcinoembryonic Antigen (CEA) Test Kaplan–Meier estimates of recurrence-free survival (RFS) stratified by ctDNA status at postoperative month 1 for patients whose preoperative CEA was positive (**A**) and negative (**B**). **C**, Receiver operator characteristic (ROC) for recurrences of ctDNA, CEA, and combination of ctDNA and CEA at postoperative month 1 (POM1). **D**, Kaplan–Meier estimates of RFS stratified by ctDNA and CEA combination status at POM1. A patient was classified as positive if the combined score was  $> -1.987$ . P values were determined using the log-rank test. CI: confidence interval; HR: hazard ratio; Pre-op: pre-operation.

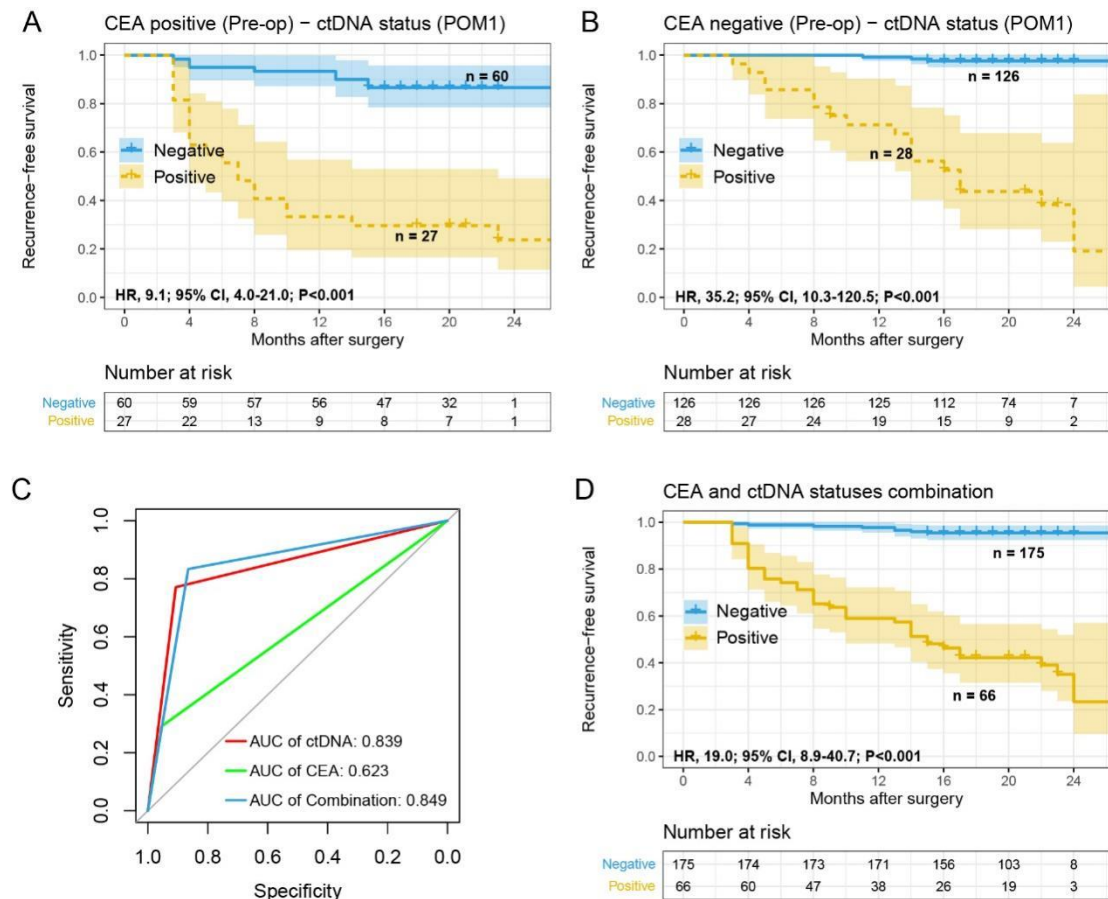

**eFigure 6.** Circulating Tumor DNA Status Postoperatively as a Prognostic Factor for Recurrence-Free Survival (RFS) in Patients With Stage III Cancer With Different Clinical Risk Stratifications and Adjuvant Chemotherapy (ACT) Treatment Durations Kaplan–Meier estimate of RFS in stage III patients receiving ACT according to ctDNA and clinical risk stratification (A) or ACT treatment duration (3 versus 6 months) (B). Kaplan–Meier estimate of RFS in high-risk stage III patients (C) and low-risk stage III patients (D) according to ctDNA status at postoperative month 1 (POM1) and treatment duration. P values were determined using the log-rank test. CI: confidence interval; HR: hazard ratio.

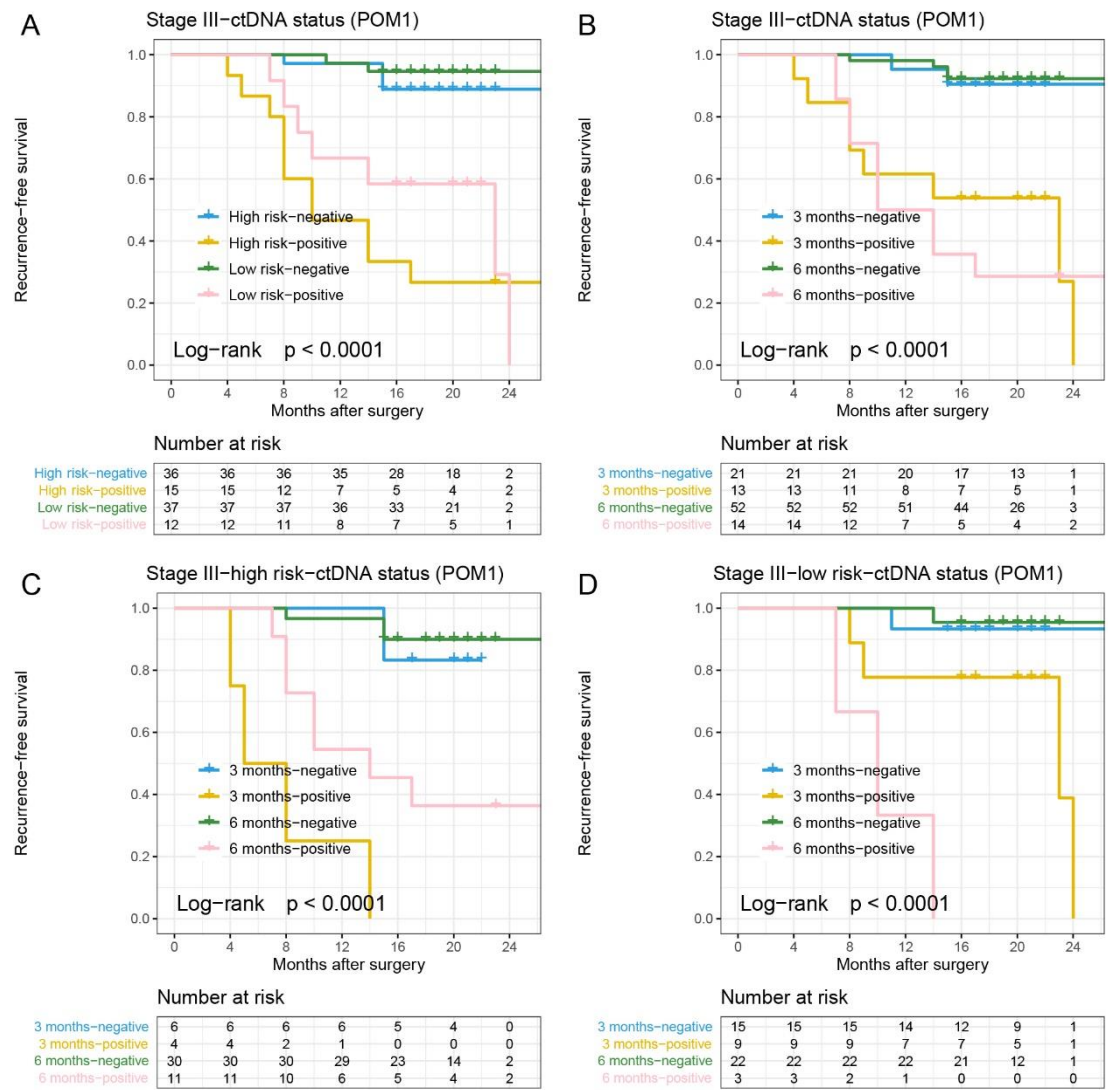



---

**eFigure 7.** Circulating Tumor DNA Status Postoperatively as a Prognostic Factor for Recurrence-Free Survival (RFS) in Patients With Stage II Cancer With Different Clinical Risk Stratifications and Adjuvant Chemotherapy (ACT) Treatment Durations

Kaplan–Meier estimate of recurrence-free survival (RFS) in stage II patients receiving ACT according to ctDNA and clinical risk stratification (A) or ACT treatment duration (3 versus 6 months) (B). Kaplan–Meier estimate of DFS in high-risk stage II patients (C) and low-risk stage II patients (D) according to ctDNA status at postoperative month 1 (POM1) and treatment duration. P values were determined using the log-rank test. E, Univariate Cox analysis of recurrence-free survival by postoperative ctDNA status at POM1. P values were determined using the log-rank test. CI: confidence interval; HR: hazard ratio.

**eFigure 7.** Circulating Tumor DNA Status Postoperatively as a Prognostic Factor for Recurrence-Free Survival (RFS) in Patients With Stage II Cancer With Different Clinical Risk Stratifications and Adjuvant Chemotherapy (ACT) Treatment Durations

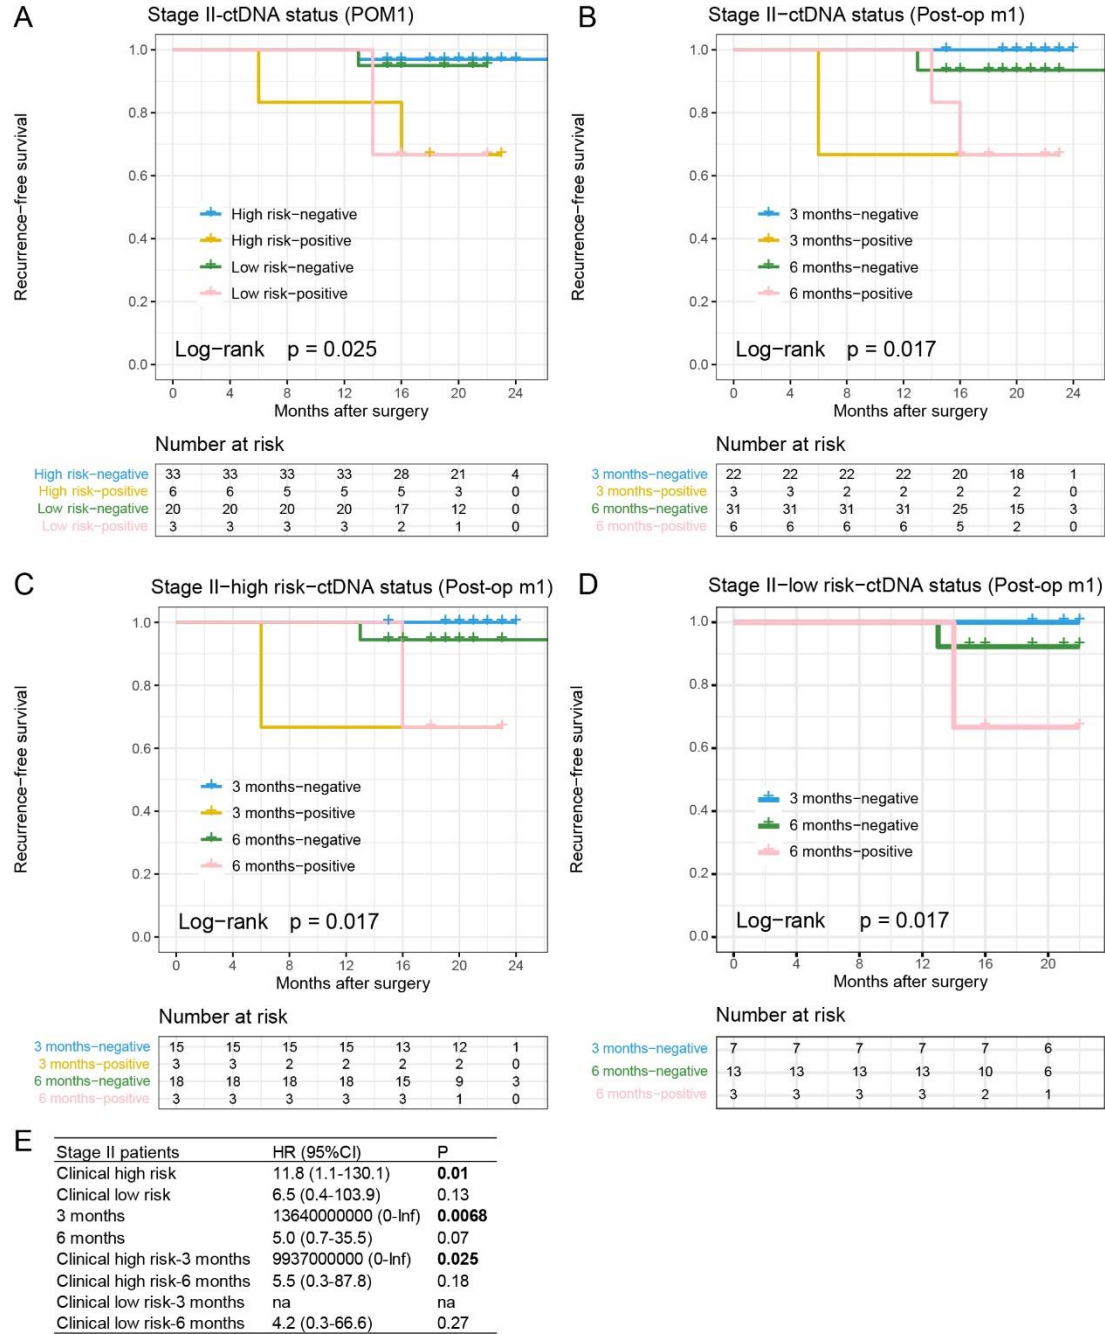

**eFigure 8.** Kaplan-Meier Estimates of Recurrence-Free Survival (RFS) Stratified by Circulating Tumor DNA Status at Postoperative Month 1 in Low-Risk Patients Without Adjuvant Chemotherapy (ACT)

P values were determined using the log-rank test. POM1: Postoperative month 1. CI: confidence interval; HR: hazard ratio.

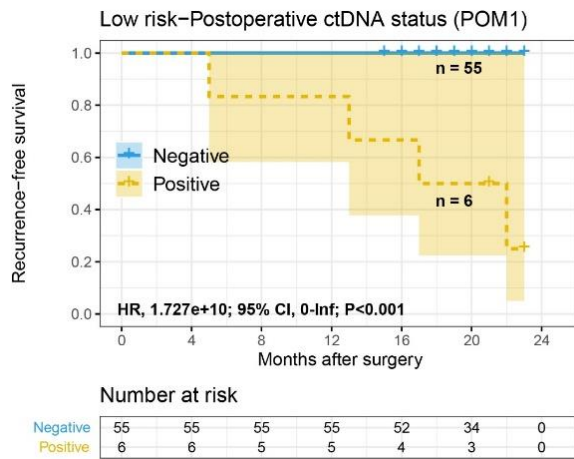

**eFigure 9.** Postadjuvant Chemotherapy (ACT) Analysis for Detecting Colorectal Cancer Recurrence

Kaplan–Meier estimates of recurrence-free survival (RFS) for ACT-treated patients stratified by ctDNA status at the first post-ACT visit. P values were determined using the log-rank test. CI: confidence interval; HR: hazard ratio.

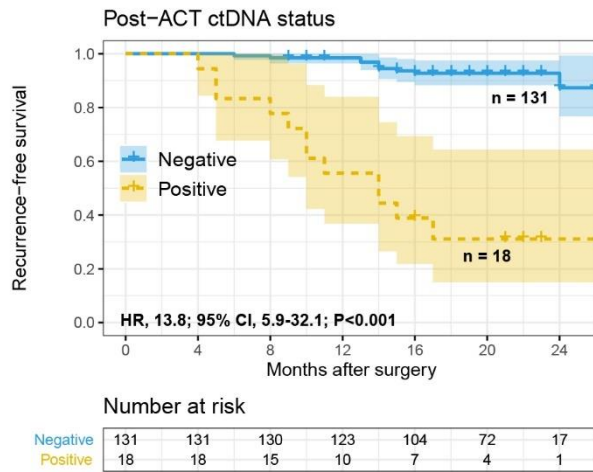

**Figure 10.** Risk Stratification by Circulating Tumor DNA in Patients Whose Plasma Was Collected at Both Postadjuvant Chemotherapy (ACT) and Postoperative Month 1 (POM1)

Kaplan–Meier estimates of recurrence-free survival (RFS) for ACT-treated patients whose plasma was collected at POM1, stratified by ctDNA status at postoperative month 1 (A) and at the first post-ACT visit (B). P values were determined using the log-rank test. Kaplan–Meier estimates of RFS for ctDNA-positive (B) and ctDNA-negative (C) patients at POM1 stratified by ctDNA status at the first post-ACT visit. E, ColonAiQ result. P values were determined using the log-rank test. CI: confidence interval; HR: hazard ratio.

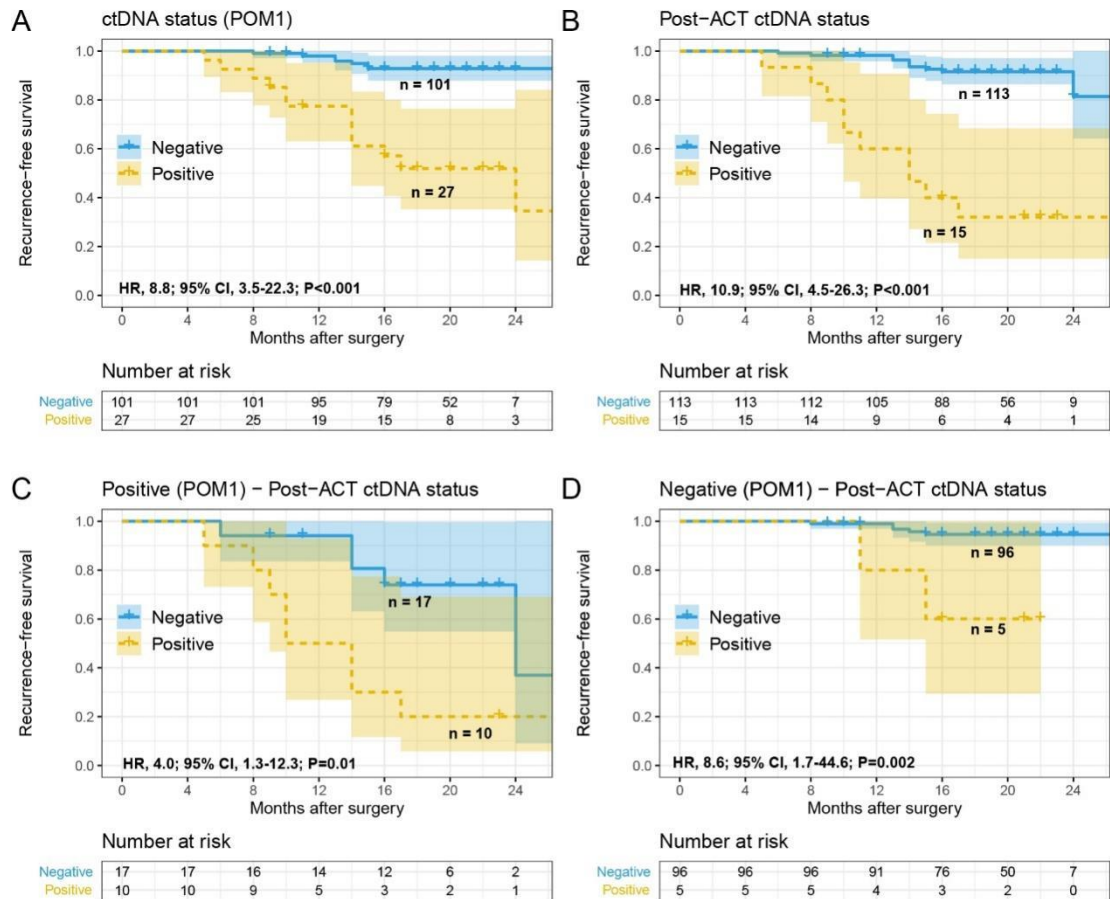

**E**

|          | ctDNA positive |                 | ctDNA negative |                 |
|----------|----------------|-----------------|----------------|-----------------|
|          | Recurrence     | Recurrence-free | Recurrence     | Recurrence-free |
| Post-ACT | 10             | 5               | 10             | 103             |
| POM1     | 13             | 14              | 7              | 94              |

**eFigure 11.** Longitudinal Plot of Circulating Tumor DNA Status During Treatment in 299 Patients

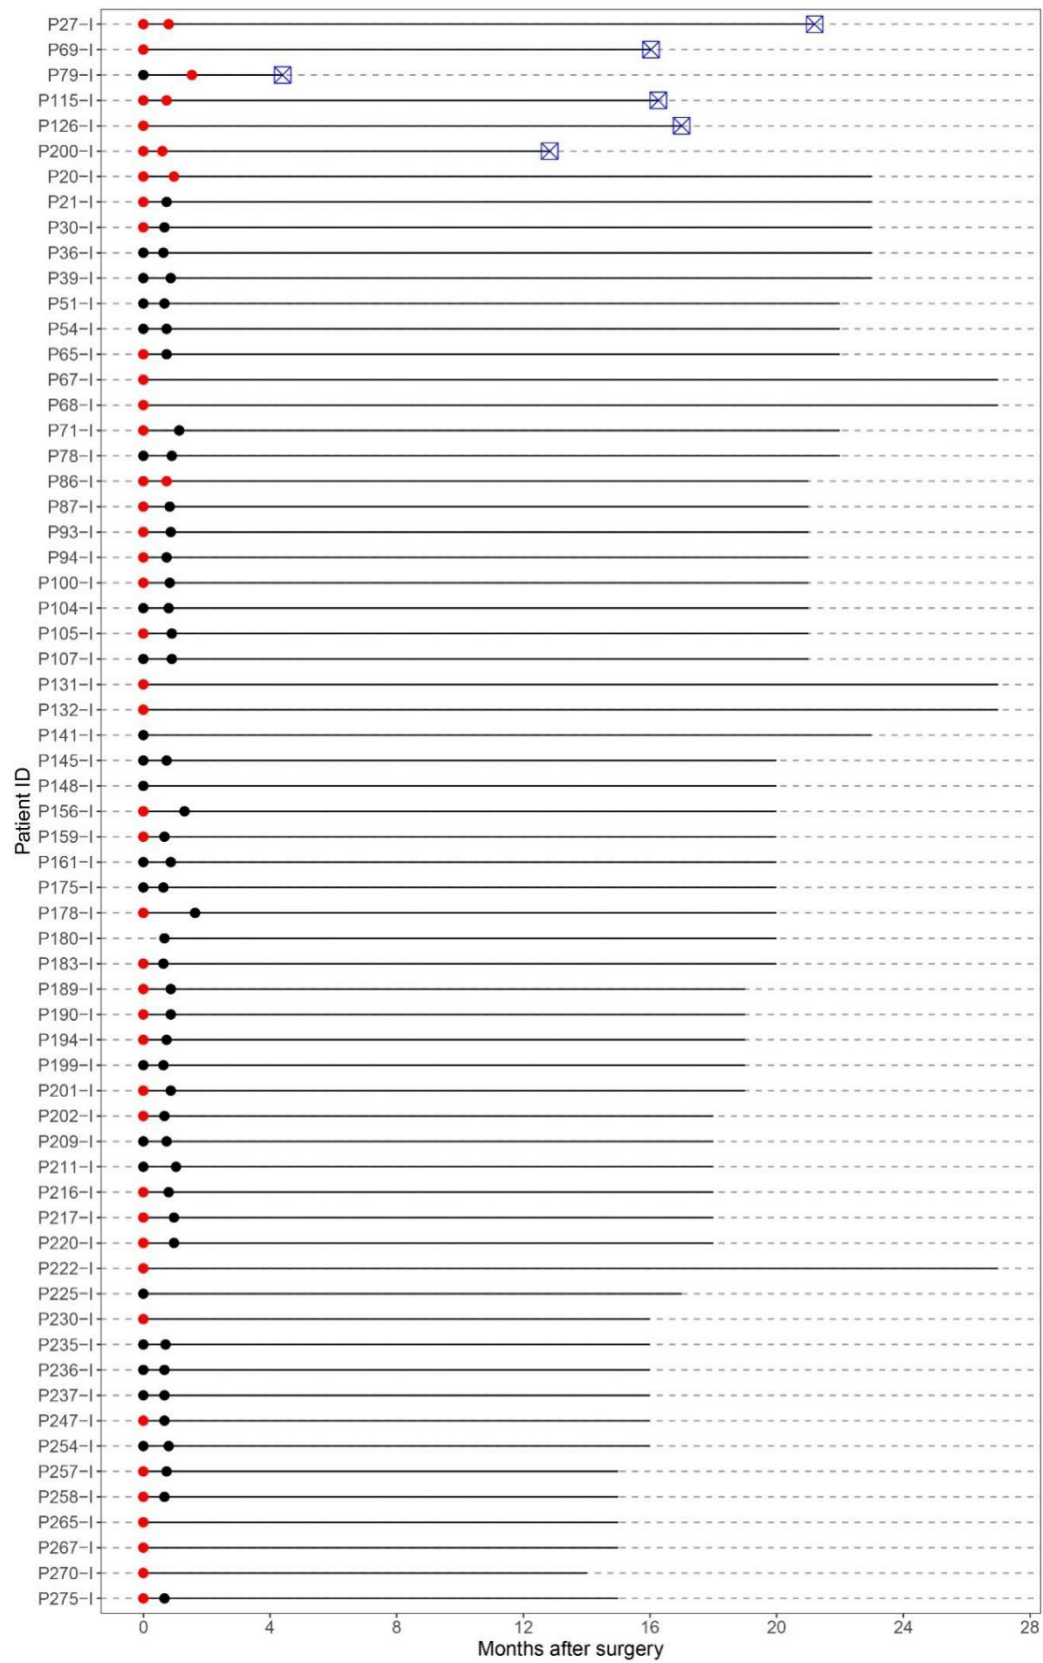

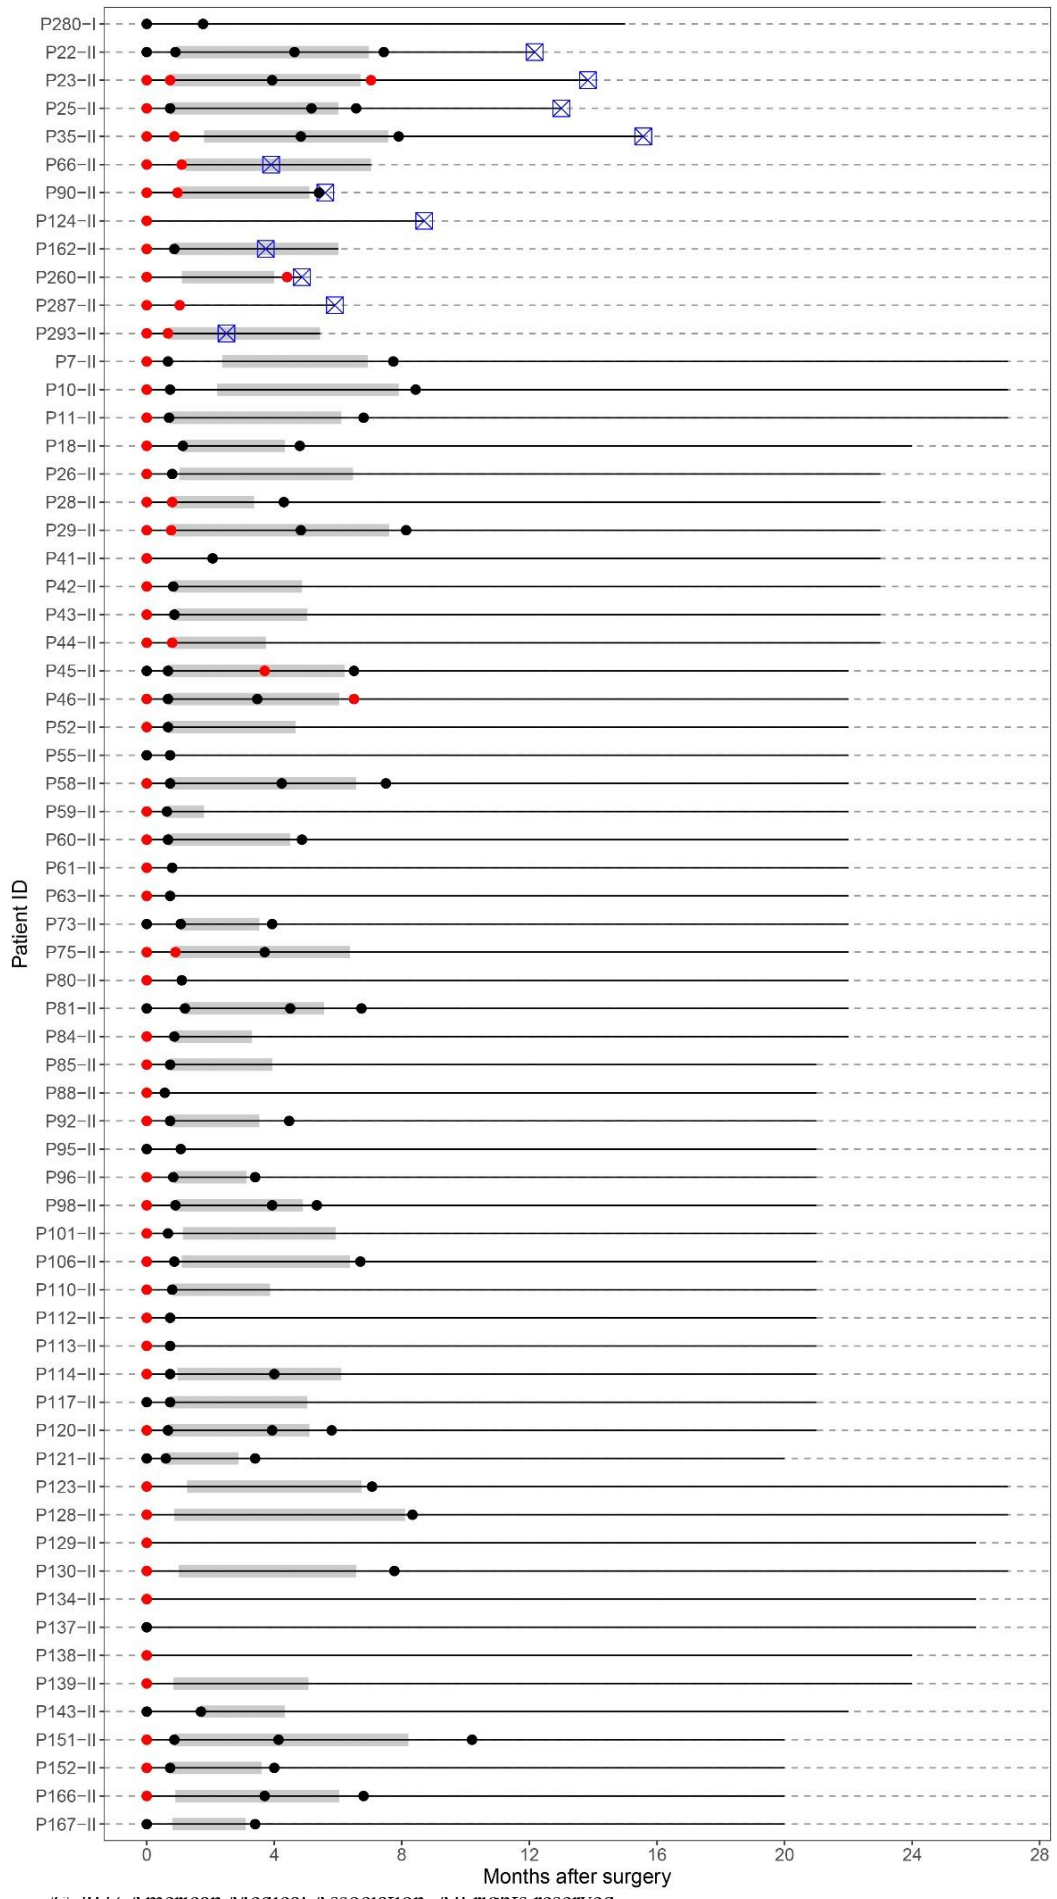

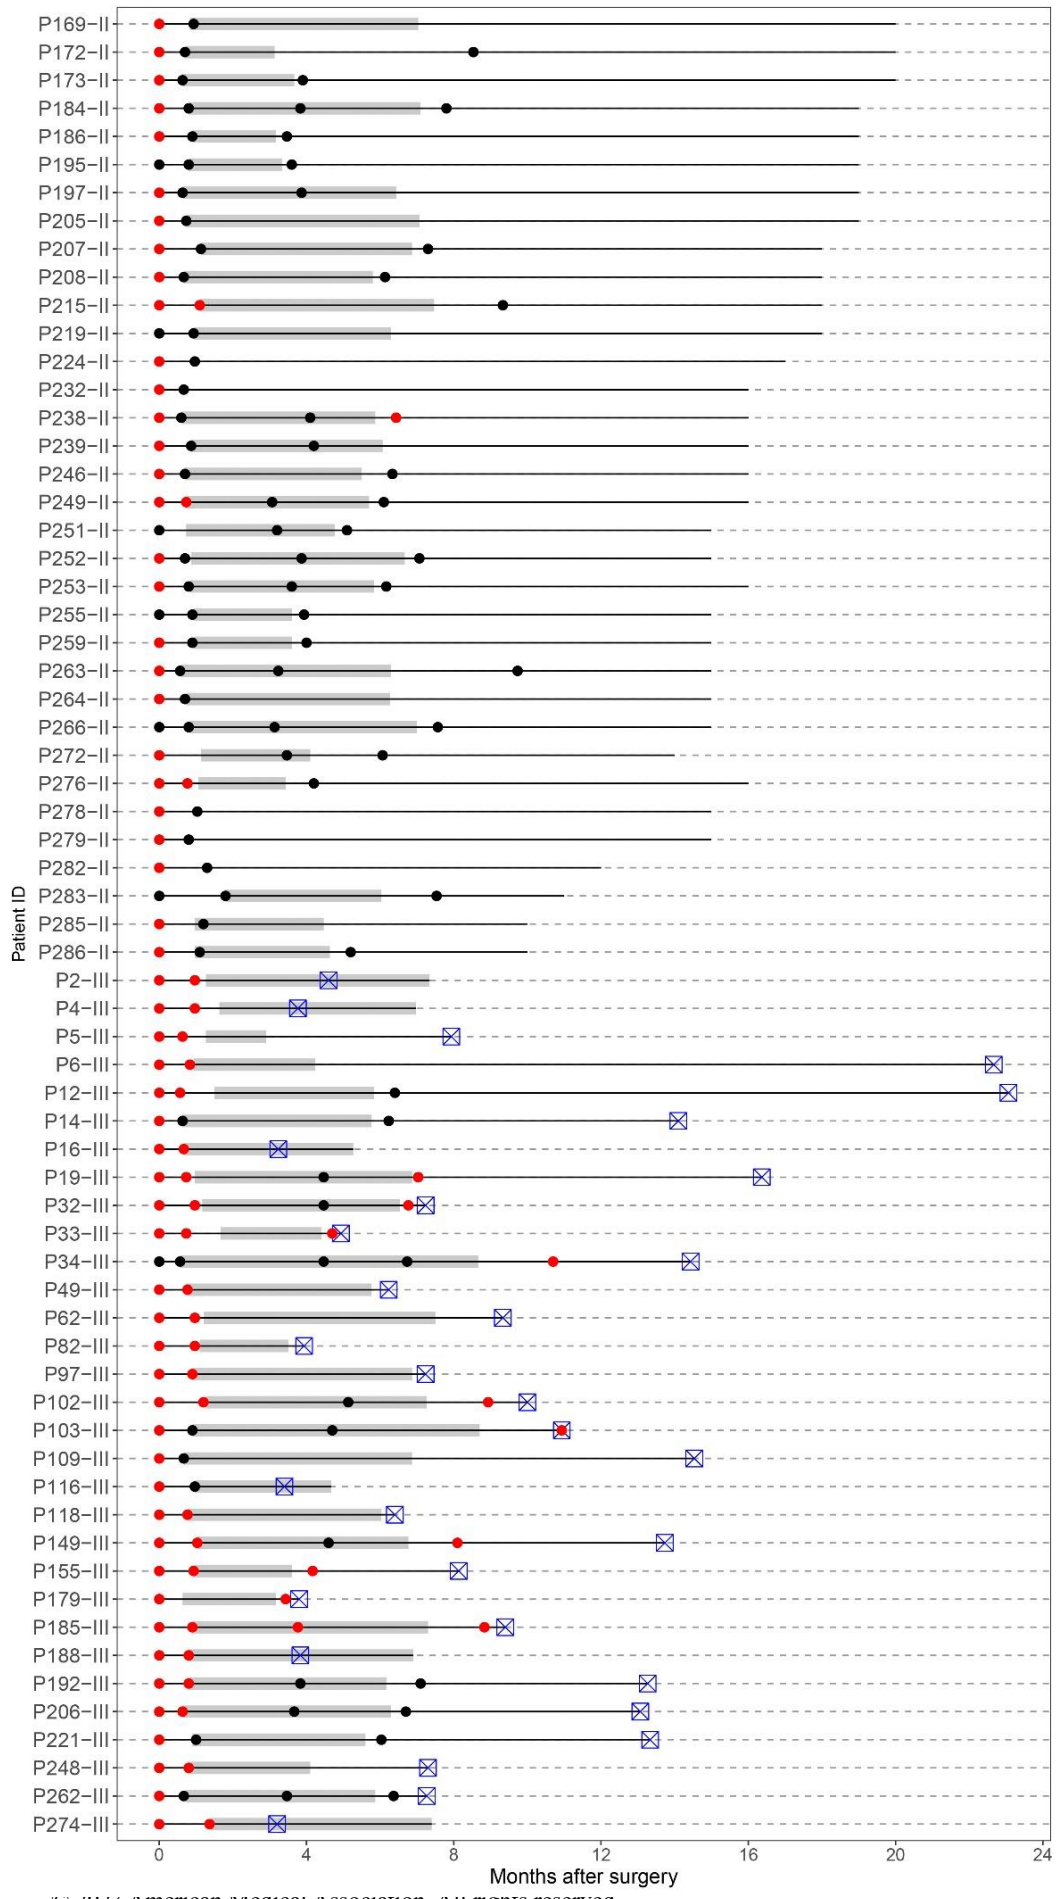



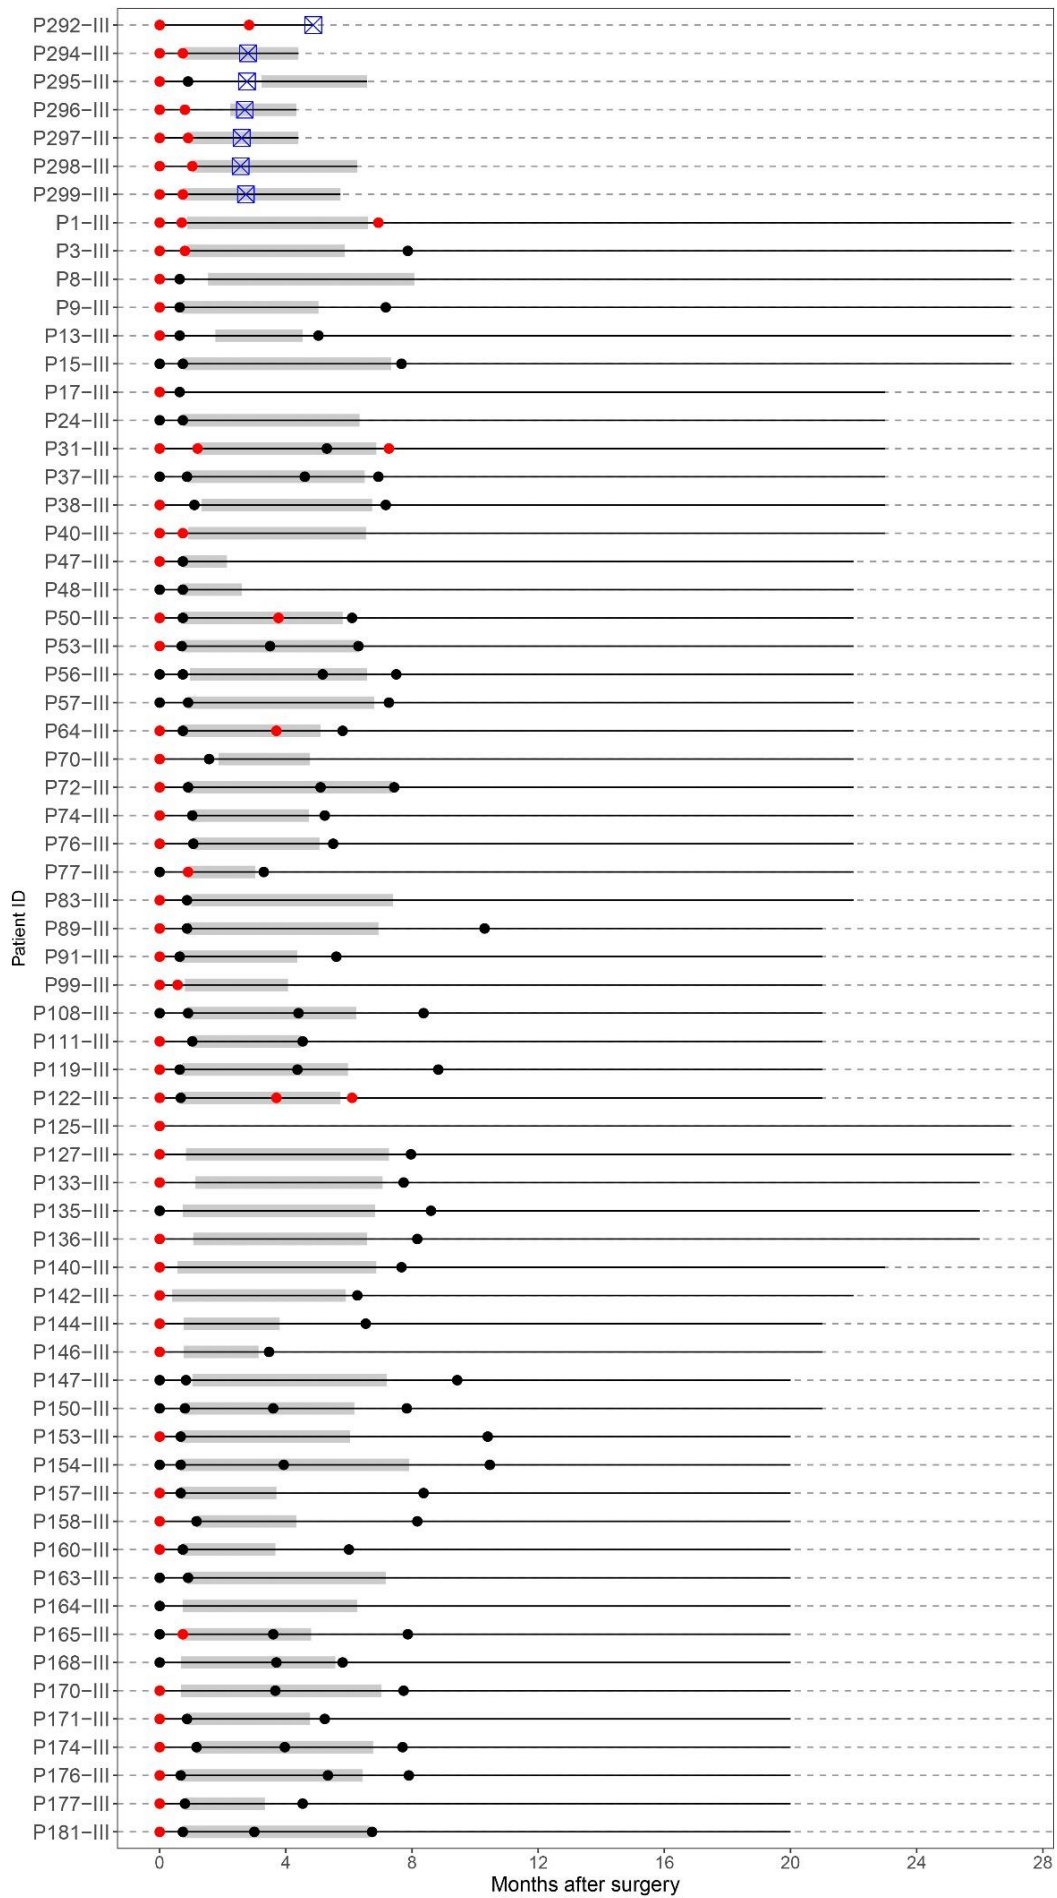

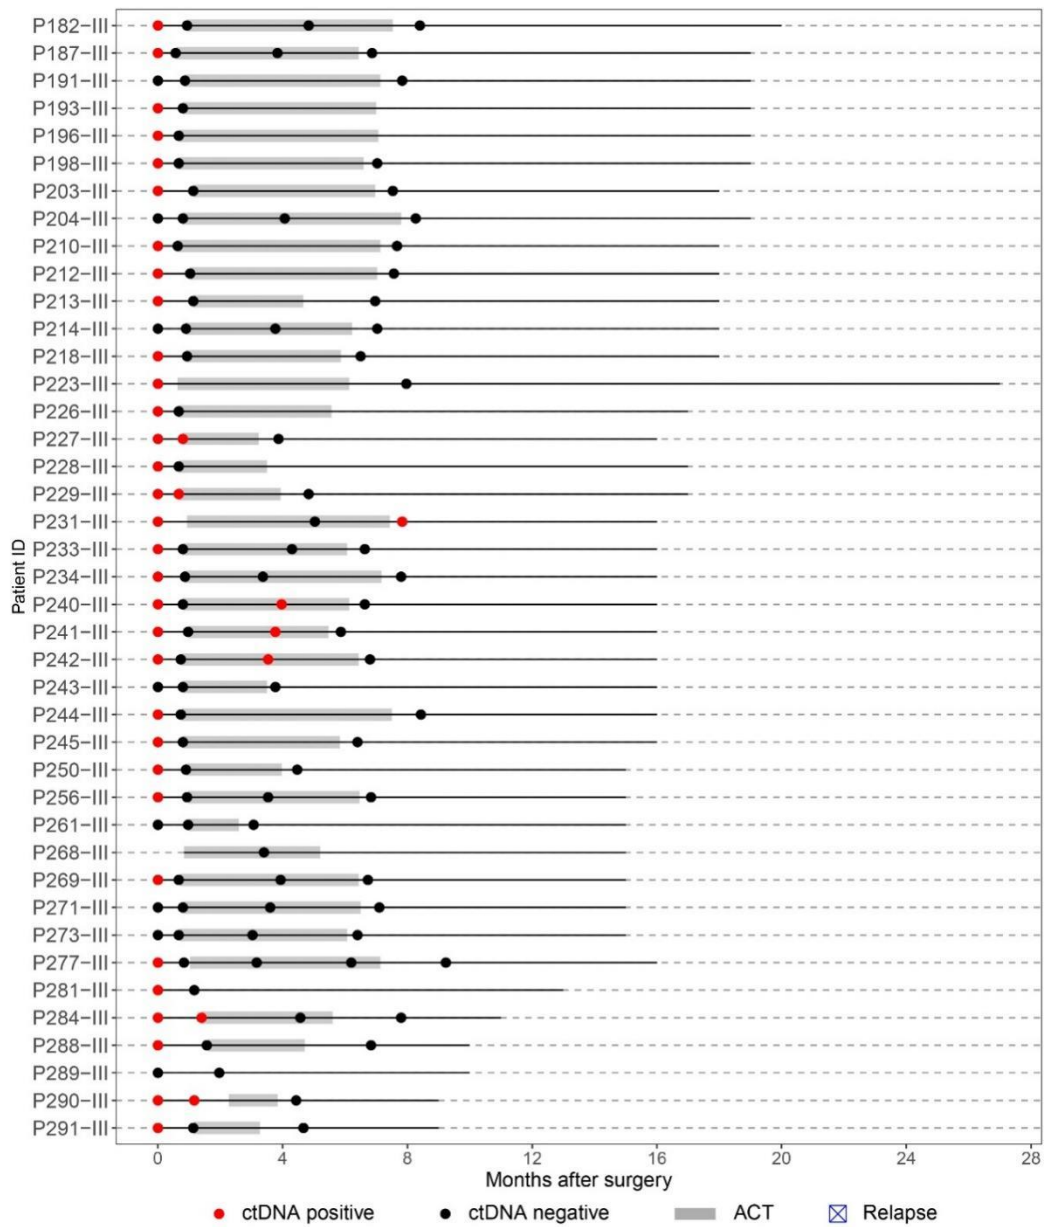

Patient ID-Stage, such as P1-III, P108-III.
