# Supplementary material
Source: PubMed Central journal article supplement (PMC10119774)
Supplement: jamaoncol-e230425-s002.pdf [file jamaoncol-e230425-s002.pdf]

## Data Sharing Statement

Mo. Early Detection of Molecular Residual Disease and Risk Stratification for Stage I to III Colorectal Cancer via Circulating Tumor DNA Methylation. *JAMA Oncol.* Published April 20, 2023. doi:10.1001/jamaoncol.2023.0425

### Data

**Data available:** Yes

**Data types:** Deidentified participant data

**How to access data:** Individual participant data that underlie the results reported in this article, after deidentification will be shared if investigators whose proposed use of the data has been approved by the investigators from the core research team members identified for this purpose. Proposals should be directed to [gxcai@fudan.edu.cn](mailto:gxcai@fudan.edu.cn).

**When available:** With publication

### Supporting Documents

**Document types:** None

### Additional Information

**Who can access the data:** Researchers whose proposed use of the data

**Types of analyses:** Academic Use, Application for Approval

**Mechanisms of data availability:** With/without investigator support (it depends on case), After approval of a proposal, or with a signed data access agreement
